# Supplementary material for: Photoredox-catalysed hydroaminoalkylation of on-DNA N -arylamines
Source: Royal Society of Chemistry journal article supplement (doi:10.1039/d2ob01956f), 2023-01-01
Supplement: d2ob01956f1.pdf [file d2ob01956f1.pdf]

## Supporting Information

### Photoredox-catalysed Hydroaminoalkylation of on-DNA *N*-Arylamines

Yasaman Mahdavi-Amiri<sup>a</sup>, Molly S. J. Hu<sup>a</sup>, Nicole Frias<sup>a</sup>, Matina Movahedi<sup>a</sup>, Adam Csakai<sup>b</sup>, Lisa A. Marcaurelle, Ryan Hili<sup>a</sup>

<sup>a</sup>Department of Chemistry, York University, Toronto, Ontario M3J 1P3, Canada.

<sup>b</sup>Encoded Library Technologies/NCE Molecular Discovery, R&D Medicinal Science and Technology, GSK, 200 Cambridge Park Drive, Cambridge, MA 02140, USA

|                                                                                  |           |
|----------------------------------------------------------------------------------|-----------|
| <b>Supporting Methods</b> .....                                                  | <b>2</b>  |
| General Information .....                                                        | 2         |
| DNA headpiece .....                                                              | 2         |
| Photocatalysts.....                                                              | 3         |
| Vinylarenes.....                                                                 | 4         |
| Synthetic procedures .....                                                       | 5         |
| General procedure for the preparation of DNA conjugates .....                    | 7         |
| HPLC purification.....                                                           | 14        |
| General procedure for ethanol precipitation .....                                | 14        |
| Photocatalysis reaction setup .....                                              | 15        |
| LCMS analysis.....                                                               | 16        |
| <b>Supporting Data</b> .....                                                     | <b>18</b> |
| Stability of DNA under photoredox conditions.....                                | 18        |
| Analysis of HAT catalyst requirement.....                                        | 19        |
| Table S1: examination of HAT catalyst (quinuclidine) dependence on reaction..... | 19        |
| LCMS spectra and deconvolution results for 1a derivatives.....                   | 20        |
| LCMS spectra and deconvolution results for 1b derivatives .....                  | 34        |
| LCMS spectra and deconvolution results for 1c derivatives.....                   | 47        |
| LCMS spectra and deconvolution results for 1d derivatives .....                  | 54        |
| LCMS spectra and deconvolution results for 1e derivatives .....                  | 61        |
| LCMS spectra and deconvolution results for 1f derivatives .....                  | 69        |
| Analysis of post-reaction DNA integrity.....                                     | 79        |
| <b>References</b> .....                                                          | <b>82</b> |

# Supporting Methods

## General Information

Purifications were performed by reverse-phase high-performance liquid chromatography (HPLC, Agilent 1260 Infinity II) using a C18 stationary phase (5 $\mu$ m Eclipse XDB-C18 9.4 x 250 mm). Liquid chromatography–mass spectrometry (LC–MS) analyses were performed using Agilent Infinity Lab LC/MSD system on a C18 stationary phase (HALO 400 A, ES-C18, 3.4  $\mu$ M, 2.1 x 30 mm).  $^1$ H NMR spectra were recorded at 400 MHz on a Bruker spectrometer. Processing of the spectra was performed with TopSpin software. Analytical thin-layer chromatography (TLC) was performed on aluminum plates pre-coated with silica gel 60F<sub>254</sub> as the adsorbent (Sigma-Aldrich, 1.05554). The developed plates were air-dried and exposed to UV light.

## DNA headpiece

DNA headpiece was prepared according to literature methods<sup>1</sup>.

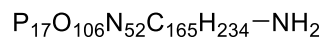

Molecular Weight: 5184 D

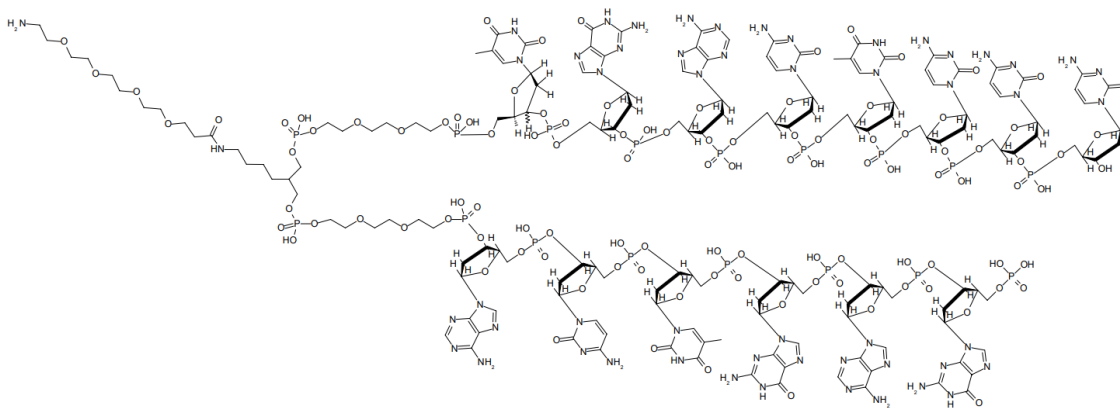

**Figure S1.** Structure of DNA headpiece

## Photocatalysts

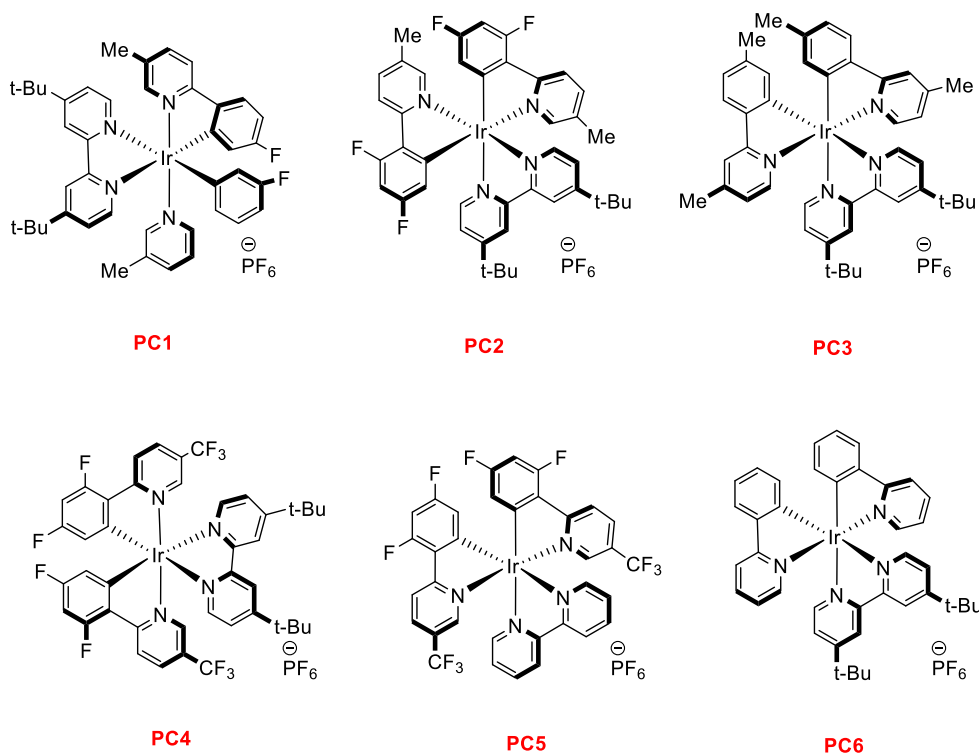

**Figure S2.** Structures of photocatalysts **PC1-PC6**

**PC1** [(4,4'-di-tert-butyl-2,2'-bipyridine)-bis-(5-methyl-2-(5-fluoro-phenyl)-pyridine)-iridium(III)] hexafluorophosphate (Sigma-Aldrich, 908703)

**PC2** [4,4'-Bis(1,1-dimethylethyl)-2,2'-bipyridine-κN,κN]bis[3,5-difluoro-2-(5-methyl-2-pyridinyl)phenyl] iridium hexafluorophosphate (Strem Chemicals, 77-0330)

**PC3** 4,4'-Bis(t-butyl-2,2'-bipyridine]bis[5-methyl-2-(4-methyl-2-pyridinyl-κN)phenyl-κC]iridium hexafluorophosphate (Strem Chemicals, 77-0218)

**PC4** (4,4'-Di-t-butyl-2,2'-bipyridine)bis[3,5-difluoro-2-[5-(trifluoromethyl)-2-pyridinyl-κN]phenyl-κC]iridium(III) hexafluorophosphate (Strem Chemicals, 77-0425)

**PC5** (2,2'-Bipyridine)bis[3,5-difluoro-2-[5-(trifluoromethyl)-2-pyridinyl-κN]][phenyl-κC]iridium(III) hexafluorophosphate (Strem Chemicals, 77-0220)

**PC6** (4,4'-Di-t-butyl-2,2'-bipyridine)bis[2-(2-pyridinyl-κN)phenyl-κC]iridium(III) hexafluorophosphate (Strem Chemicals, 77-0410)

## Vinylarenes

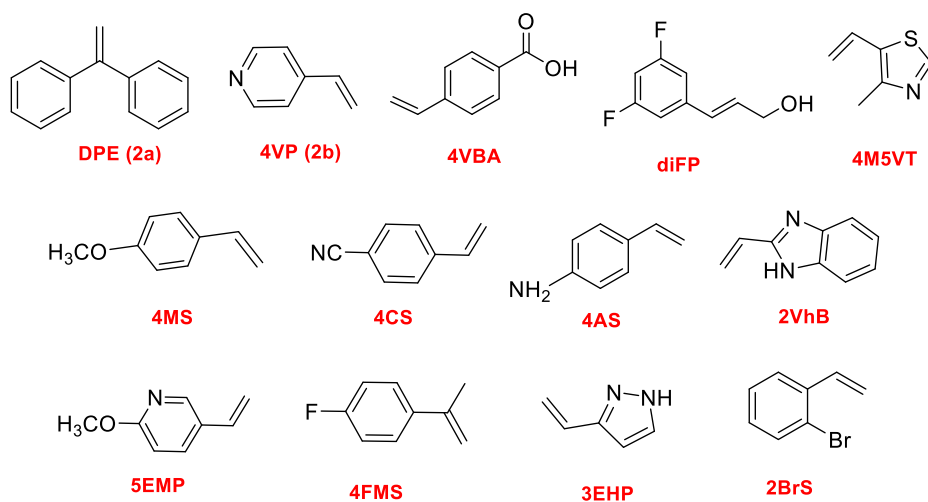

**Figure S3.** Structures of vinylarenes

|                 |                                                           |
|-----------------|-----------------------------------------------------------|
| <b>DPE (2a)</b> | 1,1-Diphenylethylene (Sigma-Aldrich, D206806)             |
| <b>4VP (2b)</b> | 4-Vinylpyridine (Sigma-Aldrich, V3204-5ML)                |
| <b>5EMP</b>     | 5-Ethenyl-2 methoxy-pyridine (Combi Blocks, QE-5274)      |
| <b>4M5VT</b>    | 4-Methyl-5-vinylthiazole (Combi Blocks, OR-0987)          |
| <b>diFP</b>     | 3-(3,5-Difluorophenyl)propenol (Combi Blocks, SS-9410)    |
| <b>4MS</b>      | 4-Methoxystyrene (Combi Blocks, QB-0479)                  |
| <b>4AS</b>      | 4-Aminostyrene (Combi Blocks, 4640)                       |
| <b>4CS</b>      | 4-Cyanostyrene (Combi Blocks, QF-7194)                    |
| <b>2VhB</b>     | 2-Vinyl-1h-benzimidazole (Combi Blocks, OR-7720)          |
| <b>2BrS</b>     | 2-Bromostyrene (Combi Blocks, OT-0650)                    |
| <b>4VBA</b>     | 4-Vinylbenzoic acid (Combi Blocks, ST-3506)               |
| <b>3EHP</b>     | 3-Ethenyl-1h-pyrazole (Combi Blocks, QE-0558)             |
| <b>4FMS</b>     | 4-Fluoro- $\alpha$ -methylstyrene (Combi Blocks, QC-4533) |

## Synthetic procedures

### 4-(N-Butylamino)benzoic acid

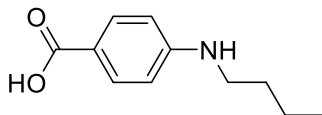

4-(N-Butylamino)benzoic acid was made by a procedure adapted from literature<sup>2</sup>: 4-Aminobenzoic acid (Sigma-Aldrich, A9878) (0.5 g, 3.65 mmol), butyraldehyde (Sigma-Aldrich, 8.01555.0100) (0.428 mL, 4.75 mmol, 1.3 eq) and 2-Methylpyridine borane complex (Sigma-Aldrich, 654213) (0.411 g, 3.76 mmol, 1.03 eq) were stirred at room temperature in methanol (5 mL) for 14 h. TLC showed that the reaction was complete (TLC system: 10% MeOH/DCM). The reaction mixture was then concentrated and partitioned between EtOAc (7 mL) and aqueous acid (1N HCl, 2 x 5 mL). The organic fractions were combined, dried over MgSO<sub>4</sub> (Sigma-Aldrich, MX0075-1) and concentrated to yield the product as a white powder. NMR spectrum matched literature data: <sup>1</sup>H NMR (400 MHz, CDCl<sub>3</sub>): δ 7.92 (d, J = 8.8 Hz, 2H), 6.55 (d, J = 8.8 Hz, 2H), 3.18 (t, J = 7.2 Hz, 2H), 1.63 (m, 2H), 1.44 (m, 2H), 0.97 (t, J = 7.4 Hz, 3H). HRMS Calcd for C<sub>11</sub>H<sub>16</sub>NO<sub>2</sub> (M+H): 194.1181 Found: 194.1158.

### 4-[(Cyclopentylmethyl)amino]benzoic acid

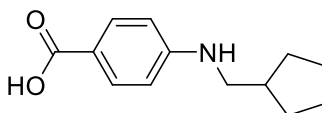

4-Aminobenzoic acid (Sigma-Aldrich, A9878) (0.25 g, 1.823 mmol), cyclopentanecarboxaldehyde 95% (Sigma-Aldrich, 526037) (0.24 mL, 2.188 mmol, 1.2 eq) and 2-Methylpyridine borane complex (Sigma-Aldrich, 654213) (0.22 g, 2 mmol, 1.1 eq) were stirred at room temperature in methanol (10 mL) for 14 hours. TLC of the top liquid showed that the reaction was complete (TLC system: 40% EtOAc/Hex). The resulting precipitate was collected, and the filtrate was acidified with 1 N hydrochloric acid to induce further precipitation. The solids were combined and dried under high vacuum to yield target material as a white powder. <sup>1</sup>H NMR (400 MHz, CDCl<sub>3</sub>): δ 7.92 (d, J = 8.9 Hz, 2H), 6.56 (d, J = 8.9 Hz, 2H), 3.10 (d, J = 7.2 Hz, 2H), 2.17 (sep, J = 7.5, 1H), 1.88-1.79 (m, 2H), 1.71-1.52 (m, 4H), 1.32-1.21 (m, 2H). <sup>13</sup>C NMR (MHz, CDCl<sub>3</sub>): δ 172.08, 152.96, 132.47, 117.05, 111.44, 48.81, 39.46, 30.73, 25.38. HRMS Calcd for C<sub>13</sub>H<sub>18</sub>NO<sub>2</sub> (M+H): 220.1337 Found: 220.1326 Calcd for C<sub>13</sub>H<sub>17</sub>NaNO<sub>2</sub> (M+Na): 242.1156 Found: 242.1146

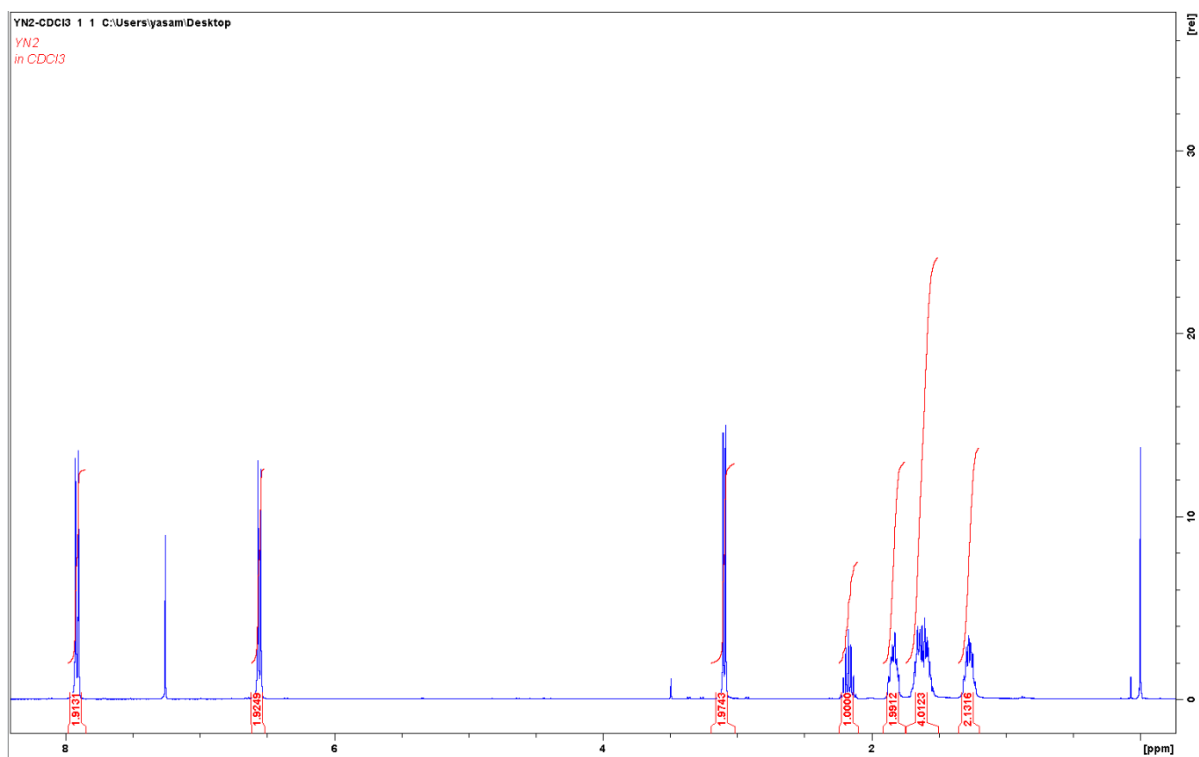

Figure S4. <sup>1</sup>H NMR spectrum of 4-[(Cyclopentylmethyl)amino]benzoic acid

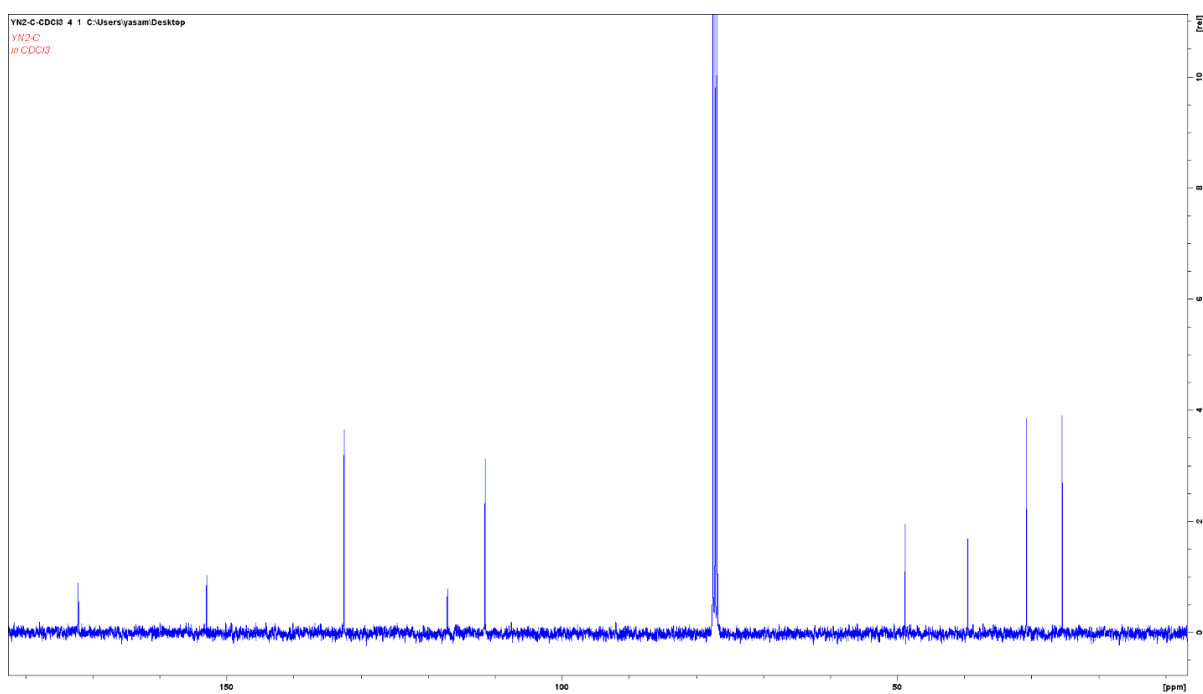

Figure S5. <sup>13</sup>C NMR spectrum of 4-[(Cyclopentylmethyl)amino]benzoic acid

#### 4-(Cycloheptylamino)benzoic acid

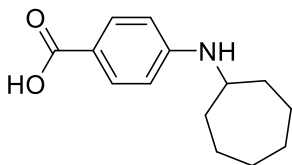

4-(Cycloheptylamino)benzoic acid was made by a procedure adapted from literature<sup>3</sup>: 4-amino benzoic acid (Sigma-Aldrich, A9878) (0.137 g, 1 mmol), cycloheptanone (Sigma-Aldrich, C99000) (236  $\mu$ L, 2 mmol), and glacial AcOH (Fisher Scientific, A38-212) (300  $\mu$ L, 5 mmol) were mixed in 1,2-dichloroethane (4.5 mL). Sodium triacetoxyborohydride (Sigma-Aldrich, 316393) (0.6 g, 2.8 mmol) was added to the above solution and the reaction mixture stirred at room temperature for 27 h. Then cycloheptanone (59  $\mu$ L, 0.5 mmol), glacial AcOH (75  $\mu$ L, 1.25 mmol), 1,2-dichloroethane (1.5 mL) and sodium triacetoxyborohydride (0.15 g, 0.7 mmol) were again added to the reaction mixture and the reaction stirred at room temperature for another 5 h after which TLC showed that the reaction was complete (TLC system: 40% Hex/EtOAc). The reaction was quenched with saturated aqueous NaHCO<sub>3</sub> (Fisher Chemical, S233-500), then the product was extracted with EtOAc (3  $\times$  7.5 mL). The EtOAc extracts were combined, dried over MgSO<sub>4</sub> (Sigma-Aldrich, MX0075-1) and concentrated to yield the crude product as a white powder. The product was triturated with ether/hexane (7:3) and the solid was filtered. The pure sample was then recrystallized from EtOAc/hexane. NMR spectrum matched literature data: <sup>1</sup>H NMR (DMSO-d<sub>6</sub>):  $\delta$  11.95 (s, 1H), 7.68 (d, J = 8.6 Hz, 2H), 6.52 (d, J = 8.6 Hz, 2H), 6.29 (d, J = 7.4 Hz, 1H), 3.45 (bs, 1H), 1.94-1.82 (m, 2H), 1.71-1.39 (m, 10H). HRMS Calcd for C<sub>14</sub>H<sub>20</sub>NO<sub>2</sub> (M+H): 234.1494 Found: 234.1494. Calcd for C<sub>14</sub>H<sub>19</sub>NaNO<sub>2</sub> (M+Na): 256.1314 Found: 256.1317

#### General procedure for the preparation of DNA conjugates

HATU (Combi Blocks, OR-0618) (400  $\mu$ L of 0.2 M in DMF), DIPEA (Alfa Aesar, A11801) (400  $\mu$ L of 0.2 M in DMF) and the respective carboxylic acid (400  $\mu$ L of 0.2 M in DMF) were mixed. The stock was cooled at 4 °C for 10 minutes then transferred to 1000  $\mu$ L of 1 mM solution of DNA headpiece in 250 mM sodium phosphate buffer (pH=9.4). The resulting solution was shaken at room temperature. After 16 h the DNA was recovered from the mixture by ethanol precipitation and then purified by HPLC.

## DNA conjugate 1a:

1a was synthesized according to the general procedure using 4-(N-Butylamino) benzoic acid.

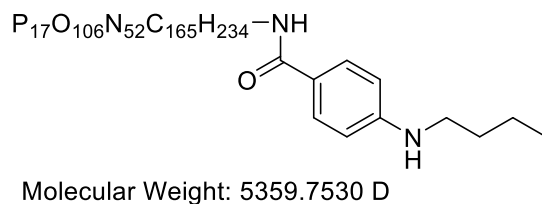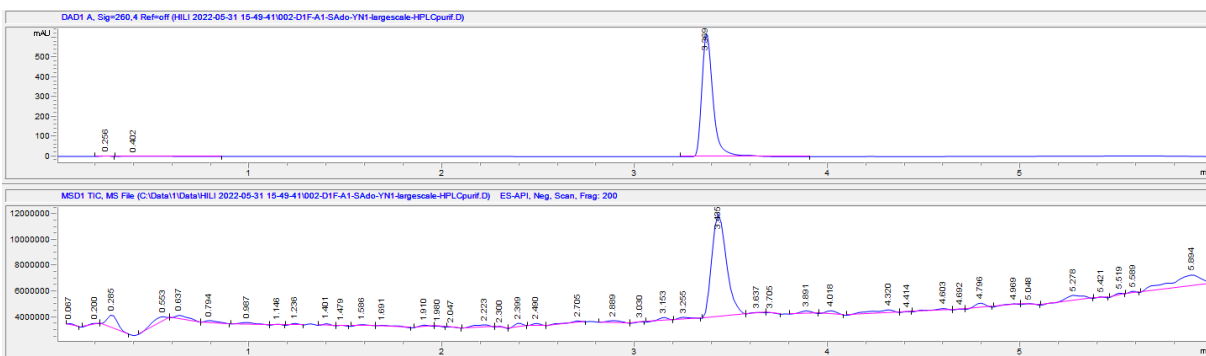

Deconvolution of Spectrum # 1 @ 2.458 - 4.148 min

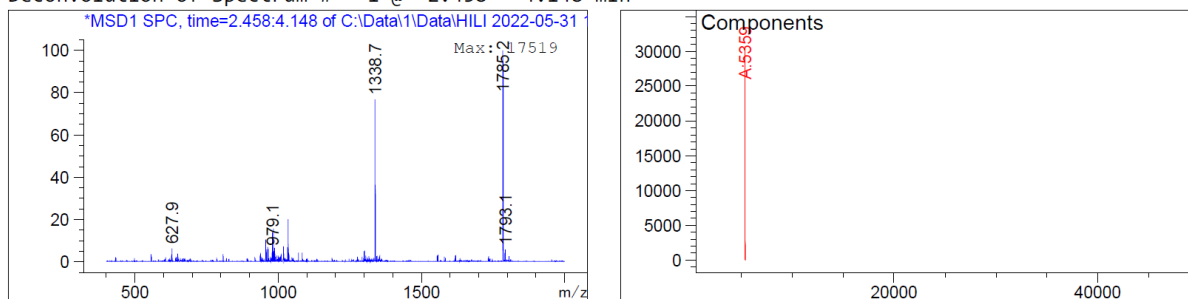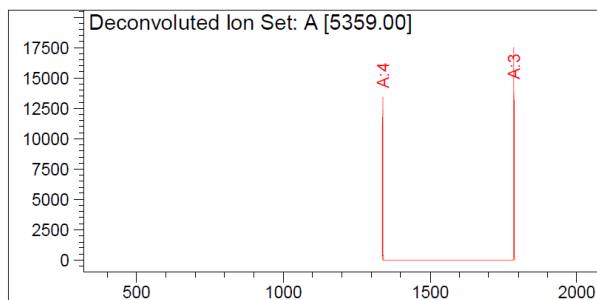

| Component | Molecular Weight | Absolute Abundance | Relative Abundance |
|-----------|------------------|--------------------|--------------------|
| A         | 5359.00          | 30540              | 100.00             |

Figure S6. Deconvoluted LCMS data for DNA conjugate 1a



## DNA conjugate 1b:

**1b** was synthesized according to the general procedure using 4-[(Cyclopentyl methyl) amino] benzoic acid.

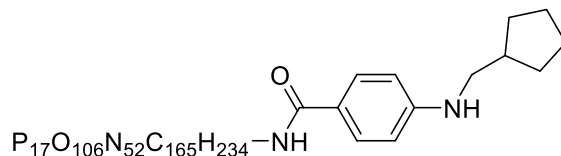

Molecular Weight: 5385.7910 D

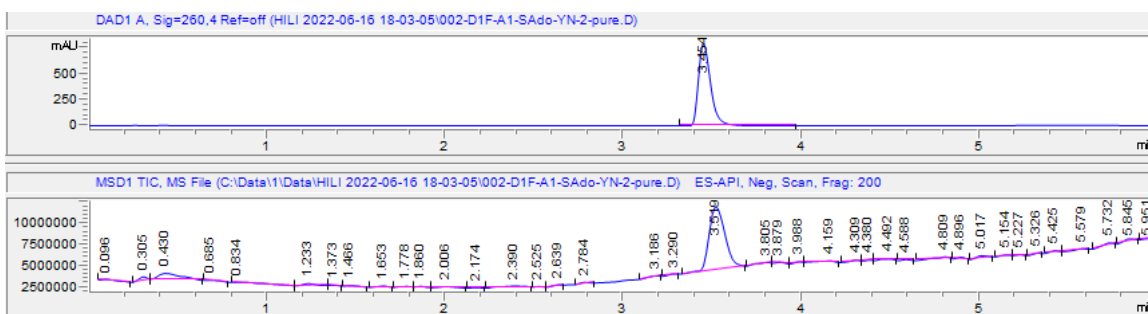

Deconvolution of Spectrum # 1 @ 3.417 - 3.742 min

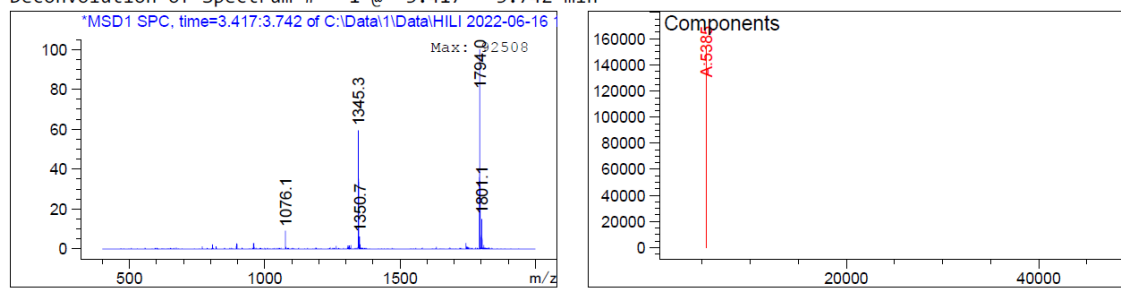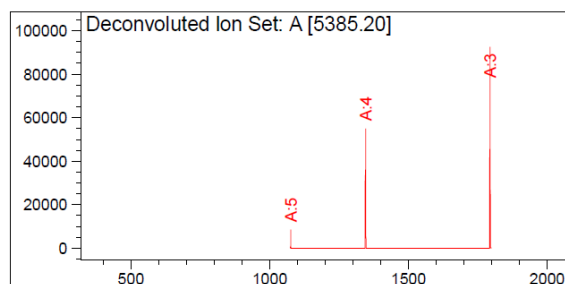

| Component | Molecular Weight | Absolute Abundance | Relative Abundance |
|-----------|------------------|--------------------|--------------------|
| A         | 5385.20          | 153884             | 100.00             |

**Figure S7.** Deconvoluted LCMS data for DNA conjugate **1b**

## DNA conjugate 1c:

**1c** was synthesized according to the general procedure using 4-(Cycloheptylamino) benzoic acid.

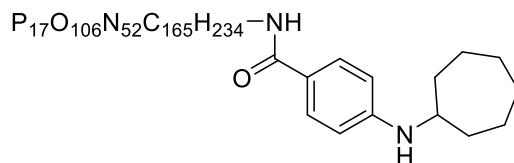

Molecular Weight: 5399.8180 D

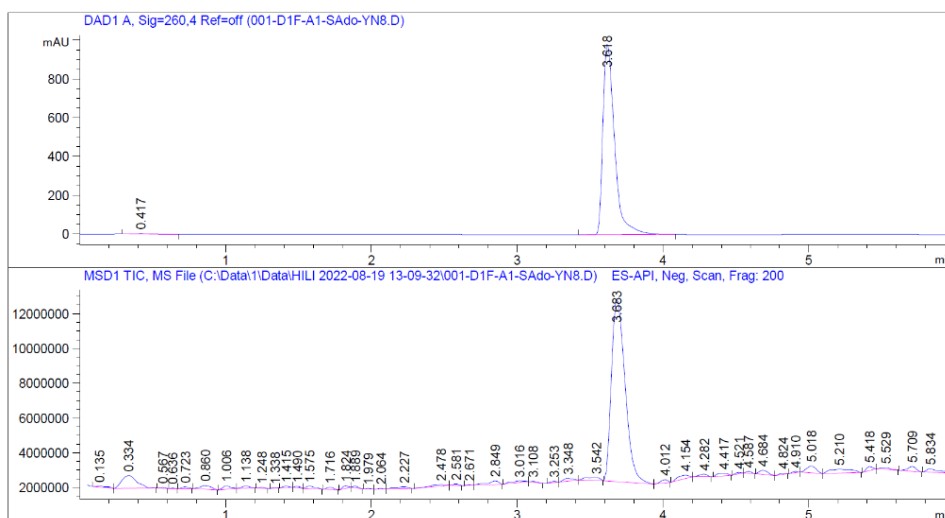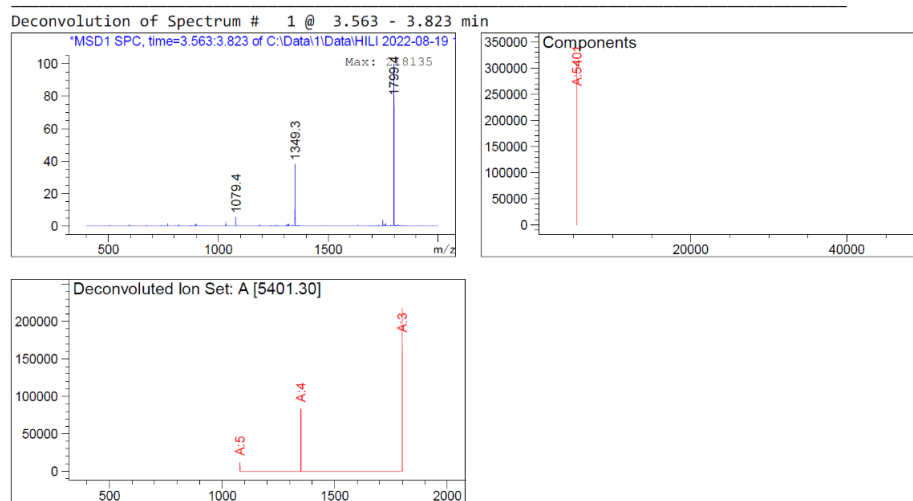

| Component | Molecular Weight | Absolute Abundance | Relative Abundance |
|-----------|------------------|--------------------|--------------------|
| A         | 5401.30          | 312393             | 100.00             |

**Figure S8.** Deconvoluted LCMS data for DNA conjugate **1c**

## DNA conjugate 1d:

**1d** was synthesized according to the general procedure using 4-(Benzylamino) benzoic acid (Sigma Aldrich, L127728).

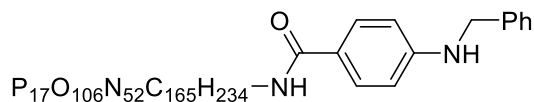

Molecular Weight: 5393.7700 D

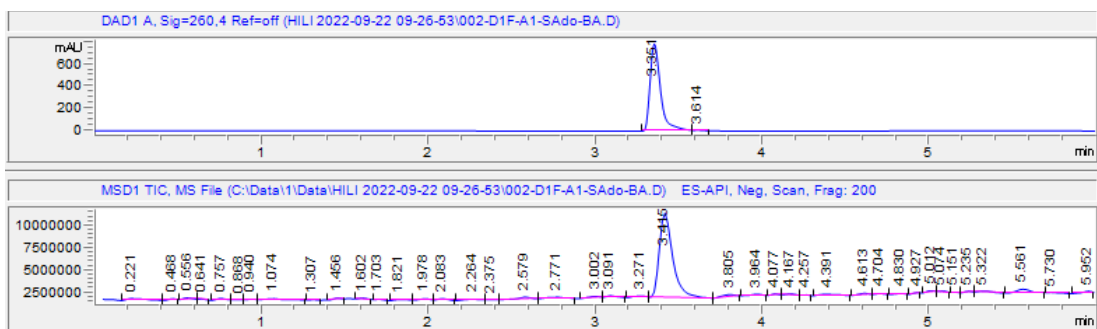

Deconvolution of Spectrum # 1 @ 3.254 - 3.563 min

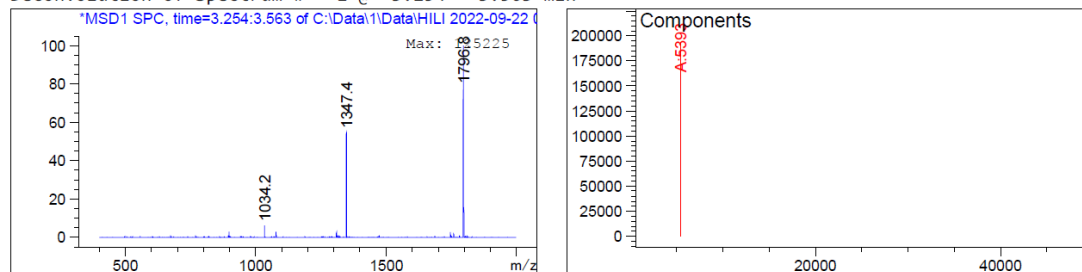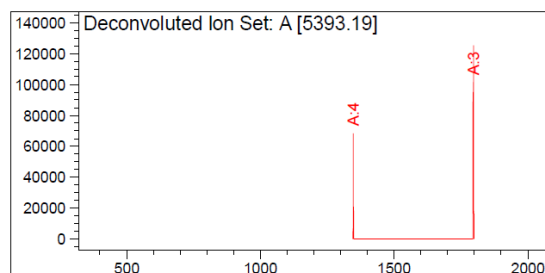

| Component | Molecular Weight | Absolute Abundance | Relative Abundance |
|-----------|------------------|--------------------|--------------------|
| A         | 5393.19          | 192952             | 100.00             |

**Figure S9.** Deconvoluted LCMS data for DNA conjugate **1d**

## DNA conjugate 1e:

**1e** was synthesized according to the general procedure using 2-[(4-pyridinylmethyl) amino] isonicotinic acid (Sigma-Aldrich, CDS021130).

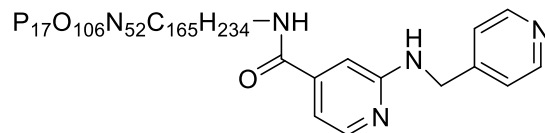

Molecular Weight: 5395.7460 D

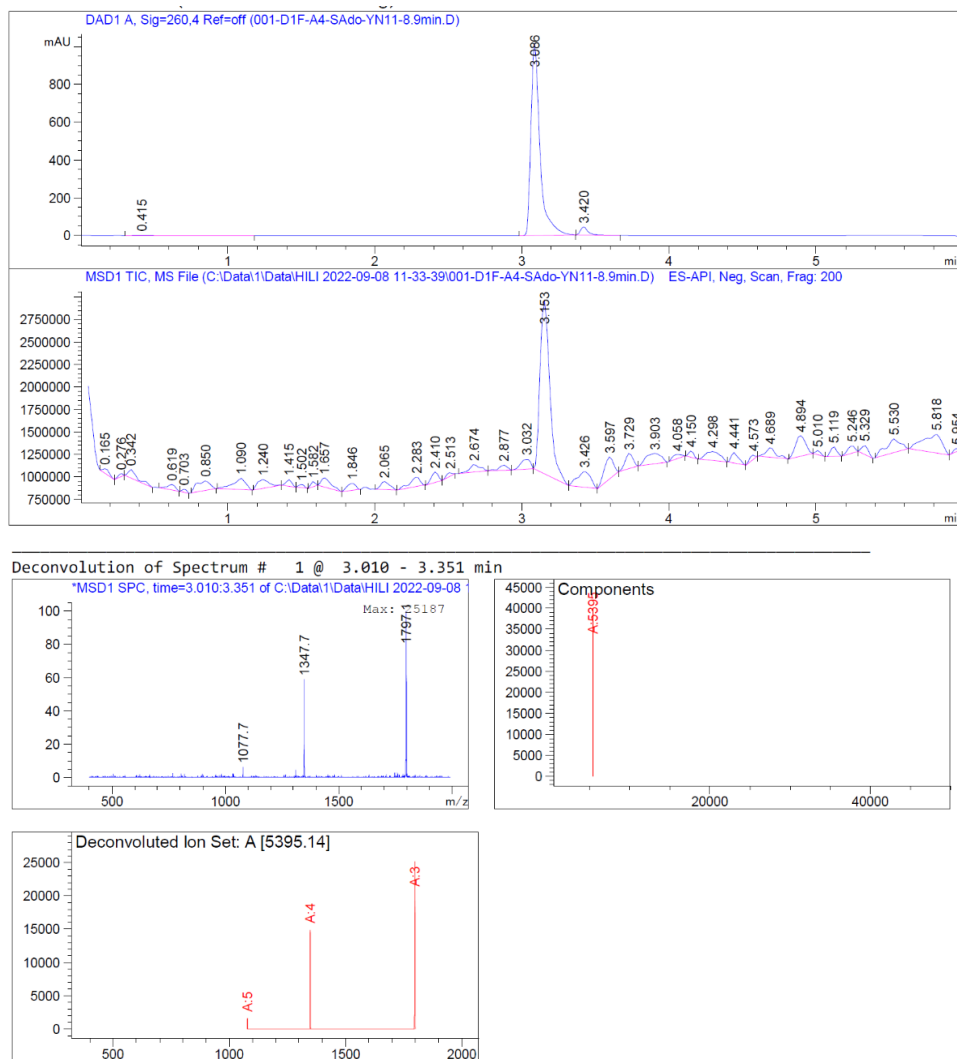

| Component | Molecular Weight | Absolute Abundance | Relative Abundance |
|-----------|------------------|--------------------|--------------------|
| A         | 5395.14          | 39883              | 100.00             |

**Figure S10.** Deconvoluted LCMS data for DNA conjugate **1e**

## DNA conjugate 1f:

**1f** was synthesized according to the general procedure using 2-(Ethylamino)-4-methyl-1,3-thiazole-5-carboxylic acid (Sigma-Aldrich, CBR00568).

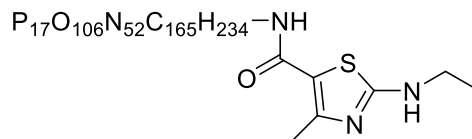

Molecular Weight: 5352.7360 D

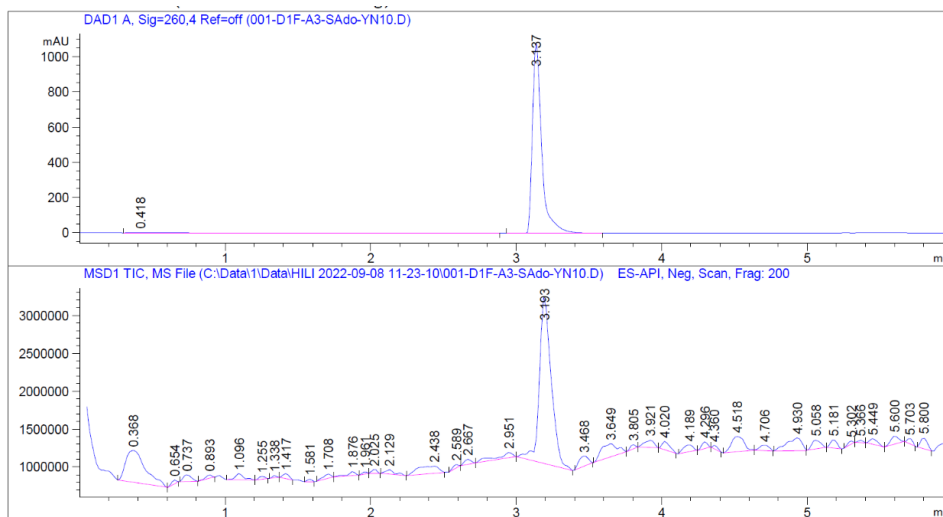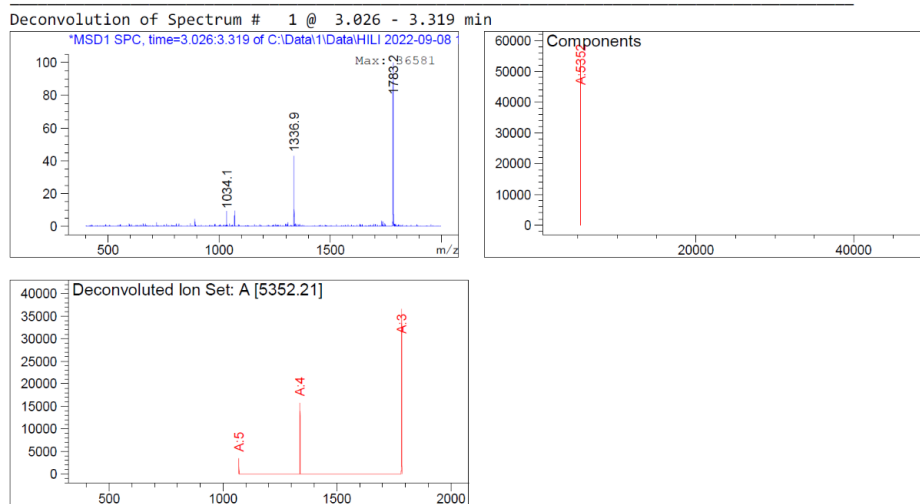

| Component | Molecular Weight | Absolute Abundance | Relative Abundance |
|-----------|------------------|--------------------|--------------------|
| A         | 5352.21          | 53606              | 100.00             |

**Figure S11.** Deconvoluted LCMS data for DNA conjugate **1f**

## HPLC purification

HPLC purifications were conducted on a 1260 Infinity II LC System from Agilent.

### HPLC method:

flow rate: 4 mL/min

Detection wavelength: 260 nm

mobile phase A: 0.1 M triethylammonium acetate (TEAA)

mobile phase B: Acetonitrile

| Elapsed time<br>(min) | %B |
|-----------------------|----|
| 0                     | 10 |
| 10                    | 20 |
| 23                    | 45 |
| 26                    | 80 |
| 28                    | 80 |
| 29                    | 10 |
| 31                    | 10 |

Column: Agilent 5 $\mu$ m Eclipse XDB-C18 9.4 x 250 mm

### General procedure for ethanol precipitation

To the reaction mixture containing DNA, was added 10% (V/V) 4 M NaCl and 3 times the volume ethanol. The solution was placed on dry ice for 1 hour and then centrifuged at 15000 rpm, at 4 °C for 30 minutes. the supernatant was removed, and the pellet was washed with 75% aq. ethanol and then air-dried.

## Photocatalysis reaction setup

In a PCR tube was added 10 nmol of DNA conjugate (in 10  $\mu\text{L}$   $\text{H}_2\text{O}$ ), quinuclidine (TCI America, Q0062) (10  $\mu\text{L}$  of 500 mM in DMF), alkene (10  $\mu\text{L}$  of 250 mM in DMF), and Iridium catalyst (10  $\mu\text{L}$  of 1 mM in DMF). The solution was degassed\* in glove box for 2 hours and then placed approximately 10 cm from blue light (highest intensity) with cooling. After 1.5 h, the DNA was recovered from the reaction mixture by Ethanol precipitation. Pellet was air-dried and resuspended in 100  $\mu\text{L}$  water and 5  $\mu\text{L}$  of the resulting solution was injected to LCMS.

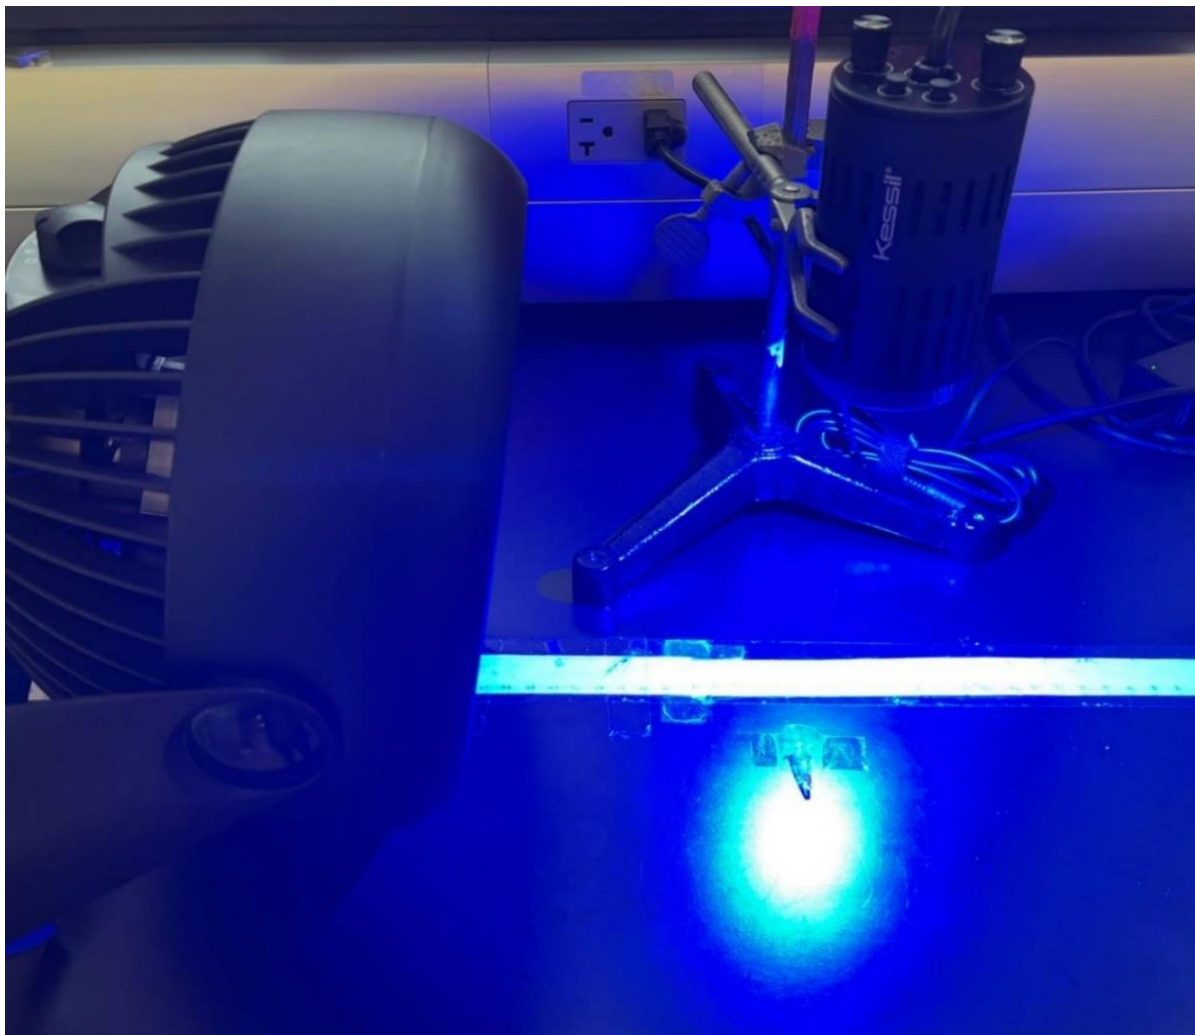

**Reaction setup:** Sample was secured 10 cm from Kessil Tuna Blue A160WE lamp set to the highest intensity. A fan was situated directly behind the reaction vessel to dissipate heat.

\* Note that oxygen had a detrimental effect on the yield of the reaction. We observed that when the mixture was not thoroughly degassed prior to irradiation with blue light, the product was contaminated with *N*-dealkylated starting material.

## LCMS analysis

LCMS analyses were performed using Agilent Infinity Lab LC/MSD system.

### LCMS method:

Flow rate: 0.5 mL/min

Detection wavelength: 260 nm

mobile phase A: 10  $\mu$ M EDTA, 0.38% TEAA pH 7, 0.75% HFIP, in 90:10 Methanol:MilliQ water

Mobile phase B: 10  $\mu$ M EDTA, 0.38% TEAA pH 7, 0.75% HFIP, in MilliQ water

| Elapsed time (min) | %B |
|--------------------|----|
| 0                  | 90 |
| 4                  | 10 |
| 5                  | 90 |
| 6                  | 90 |

Column: HALO 400 A, ES-C18, 3.4  $\mu$ M, 2.1 x 30 mm

### Conversion calculations for on-DNA reactions through LCMS:

Reported % conversion as determined from LCMS analysis by comparing the abundance of all DNA-derived compounds.

$$\% \text{ Conversion} = \frac{\text{Total abundance of target material}}{\text{Total abundance of DNA material}} \times 100$$

Example of LCMS data and calculations:

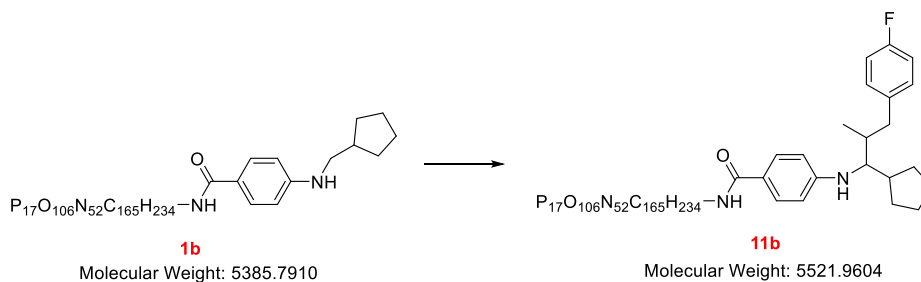



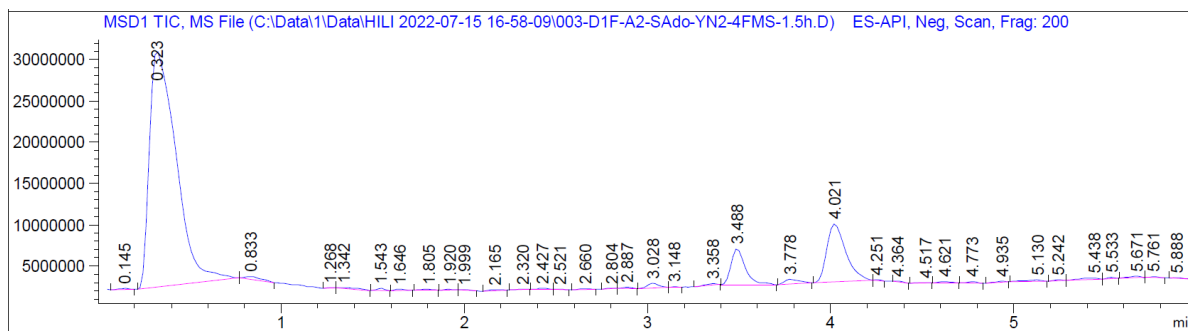

| Component | Molecular Weight | Absolute Abundance | Relative Abundance |
|-----------|------------------|--------------------|--------------------|
| A         | 5521.30          | 65013              | 100.00             |
| B         | 5385.22          | 32602              | 50.15              |

A (%) = percent single addition =  $100 / (100+50.15) = 67\%$

B (%) = percent starting material =  $50.15 / (100+50.15) = 33\%$

**Figure S12.** An example of conversion calculations

## ***Supporting Data***

### **Stability of DNA under photoredox conditions**

Photocatalysis reaction was performed on a model DNA conjugate with 4-vinyl pyridine for 0, 1.5, 2, 2.5, 3, 4 h and the DNA stability was assessed using non-denaturing gel analysis:

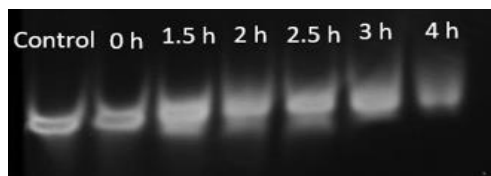

**Figure S13.** Stability of DNA under photoredox conditions

## Analysis of HAT catalyst requirement

Table S1: examination of HAT catalyst (quinuclidine) dependence on reaction

|   |                                      | SM  | Single Addn | Double Addn | Triple Addn | Unknown      | Dealkylation |
|---|--------------------------------------|-----|-------------|-------------|-------------|--------------|--------------|
| 1 | <b>1d + 4VP</b><br>no quinuclidine   | -   | 90%         | -           | -           | -            | 10%          |
| 2 | <b>1d + DPE</b><br>no quinuclidine   | 59% | 16%         | -           | -           | 5482.31: 10% | 15%          |
| 3 | <b>1d + 4VP</b><br>with quinuclidine | -   | 68%         | 25%         | 7%          | -            | -            |
| 4 | <b>1d + DPE</b><br>with quinuclidine | 77% | 23%         | -           | -           | -            | -            |

## LCMS spectra and deconvolution results for 1a derivatives

**Table S2:** Hydroaminoalkylation of various vinylarenes with DNA conjugate **1a**

|                 | Starting Material (1a) | Single Addition | Double Addition | Triple Addition |
|-----------------|------------------------|-----------------|-----------------|-----------------|
| <b>1a+4VP</b>   |                        | <b>4a:</b> 73%  | 27%             | -               |
| <b>1a+4CS</b>   | 8%                     | <b>7a:</b> 76%  | 16%             | -               |
| <b>1a+2BrS</b>  | 15%                    | <b>5a:</b> 76%  | 9%              | -               |
| <b>1a+2VhB</b>  | 15%                    | <b>6a:</b> 71%  | 14%             | -               |
| <b>1a+DPE</b>   | 25%                    | <b>3a:</b> 75%  | -               | -               |
| <b>1a+diFP</b>  | 14%                    | <b>8a:</b> 86%  | -               | -               |
| <b>1a+3EhP</b>  | 49%                    | <b>9a:</b> 51%  | -               | -               |
| <b>1a+4M5VT</b> | 51%                    | <b>10a:</b> 49% | -               | -               |
| <b>1a+4FMS</b>  | 66%                    | <b>11a:</b> 34% | -               | -               |
| <b>1a+5EMP</b>  | 68%                    | <b>12a:</b> 32% | -               | -               |
| <b>1a+4MS</b>   | 73%                    | <b>13a:</b> 27% | -               | -               |
| <b>1a+4VBA</b>  | 76%                    | <b>14a:</b> 24% | -               | -               |
| <b>1a+4AS</b>   | 100%                   | -               | -               | -               |



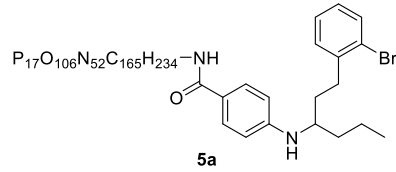

Molecular Weight: 5542.8010

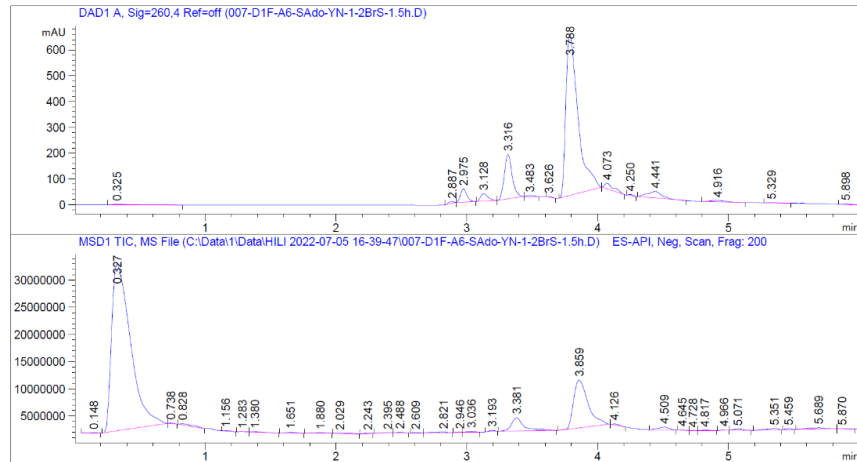

Deconvolution of Spectrum # 1 @ 3.140 - 4.229 min

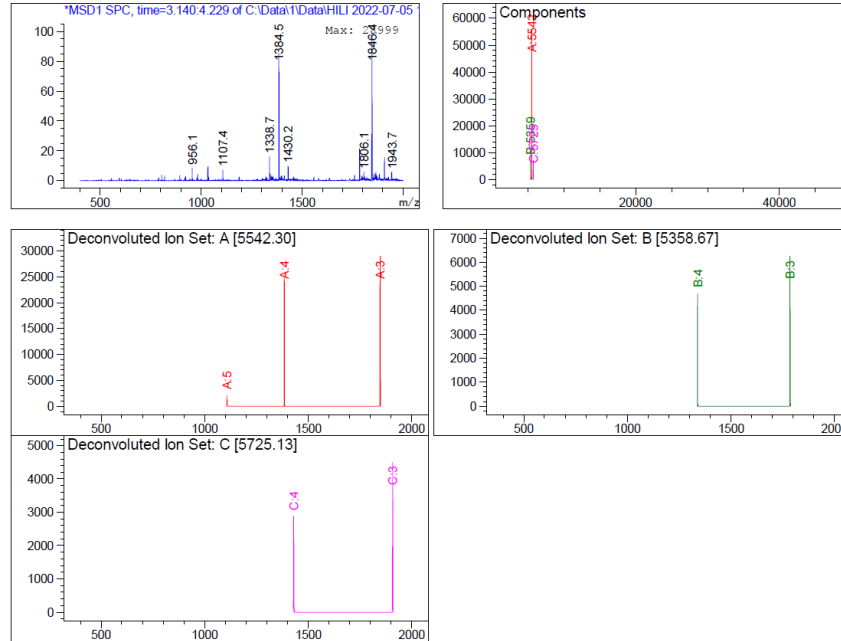

| Component | Molecular Weight | Absolute Abundance | Relative Abundance |
|-----------|------------------|--------------------|--------------------|
| A         | 5542.30          | 55761              | 100.00             |
| B         | 5358.67          | 10836              | 19.43              |
| C         | 5725.13          | 7163               | 12.85              |

**Figure S15.** Deconvoluted LCMS data for **5a**

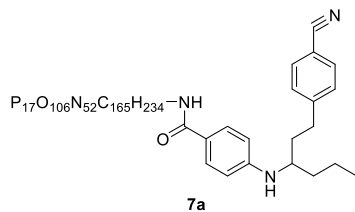

Molecular Weight: 5488.9150

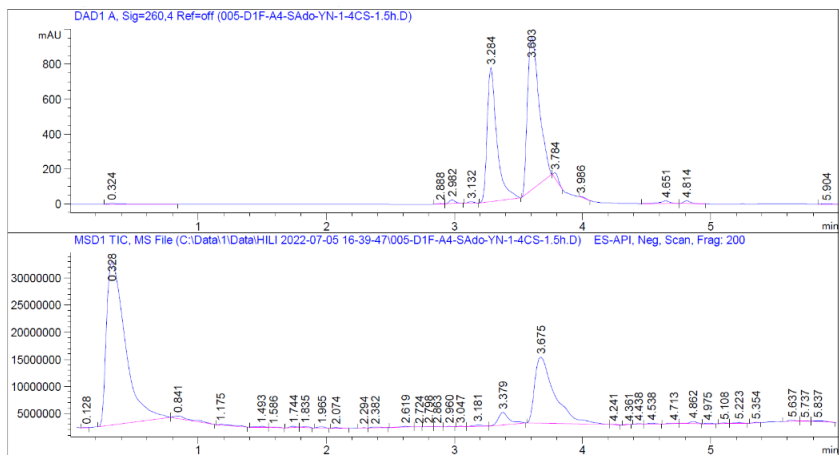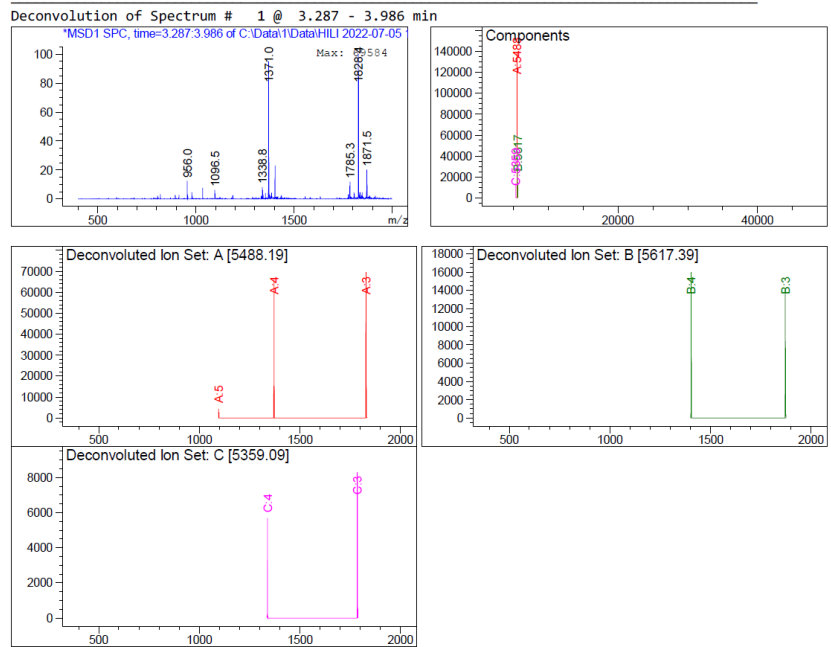

| Component | Molecular Weight | Absolute Abundance | Relative Abundance |
|-----------|------------------|--------------------|--------------------|
| A         | 5488.19          | 139142             | 100.00             |
| B         | 5617.39          | 30006              | 21.57              |
| C         | 5359.09          | 13902              | 9.99               |

**Figure S16.** Deconvoluted LCMS data for **7a**

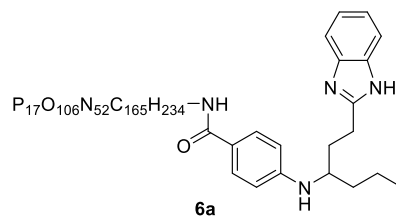

Molecular Weight: 5503.9300

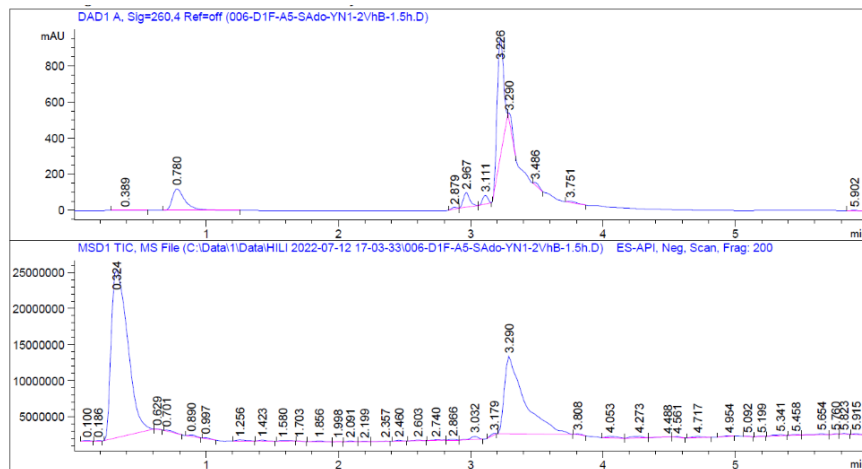

Deconvolution of Spectrum # 1 @ 2.994 - 3.741 min

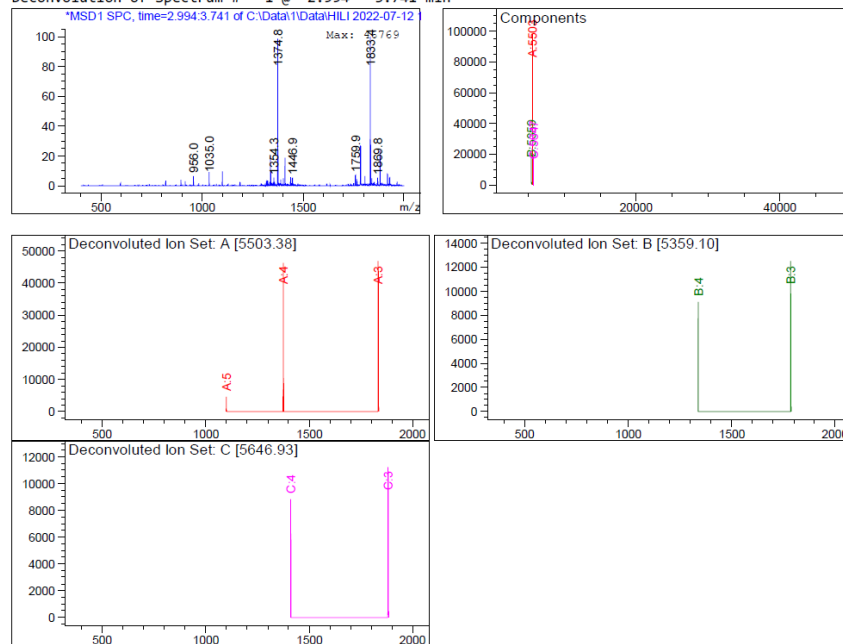

| Component | Molecular Weight | Absolute Abundance | Relative Abundance |
|-----------|------------------|--------------------|--------------------|
| A         | 5503.38          | 97490              | 100.00             |
| B         | 5359.10          | 21018              | 21.56              |
| C         | 5646.93          | 19824              | 20.33              |

**Figure S17.** Deconvoluted LCMS data for **6a**



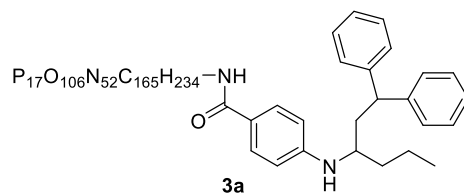

Molecular Weight: 5540.0030

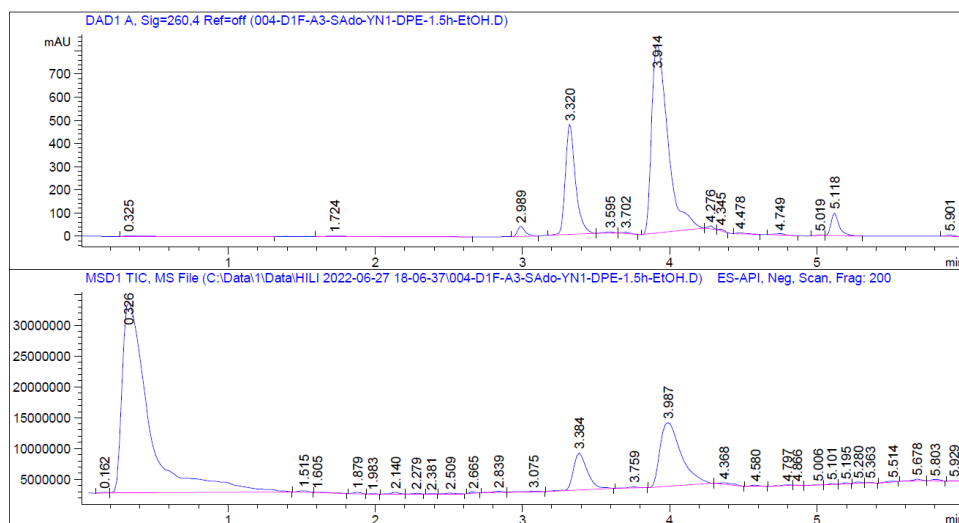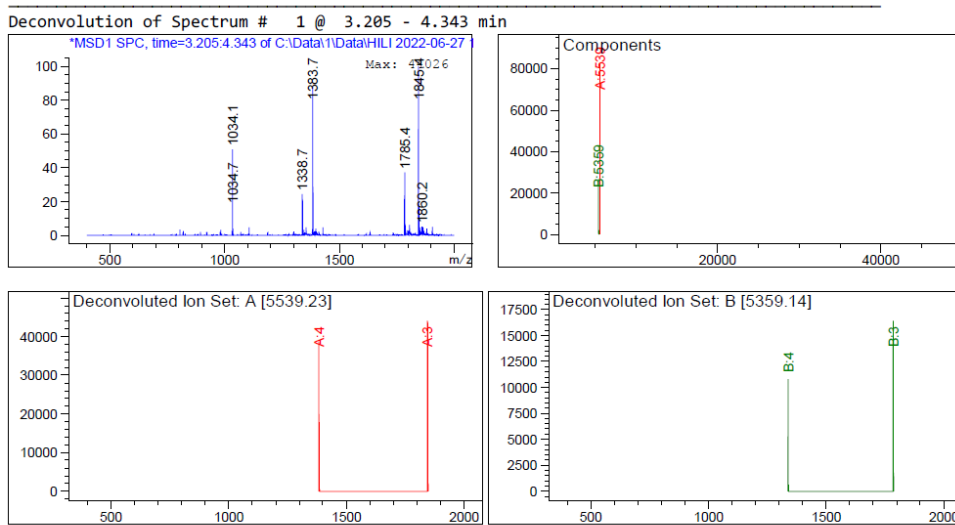

| Component | Molecular Weight | Absolute Abundance | Relative Abundance |
|-----------|------------------|--------------------|--------------------|
| A         | 5539.23          | 82233              | 100.00             |
| B         | 5359.14          | 26802              | 32.59              |

**Figure S18. Deconvoluted LCMS data for 3a (10 nmol)**

Deconvolution of Spectrum # 1 @ 3.222 - 4.132 min

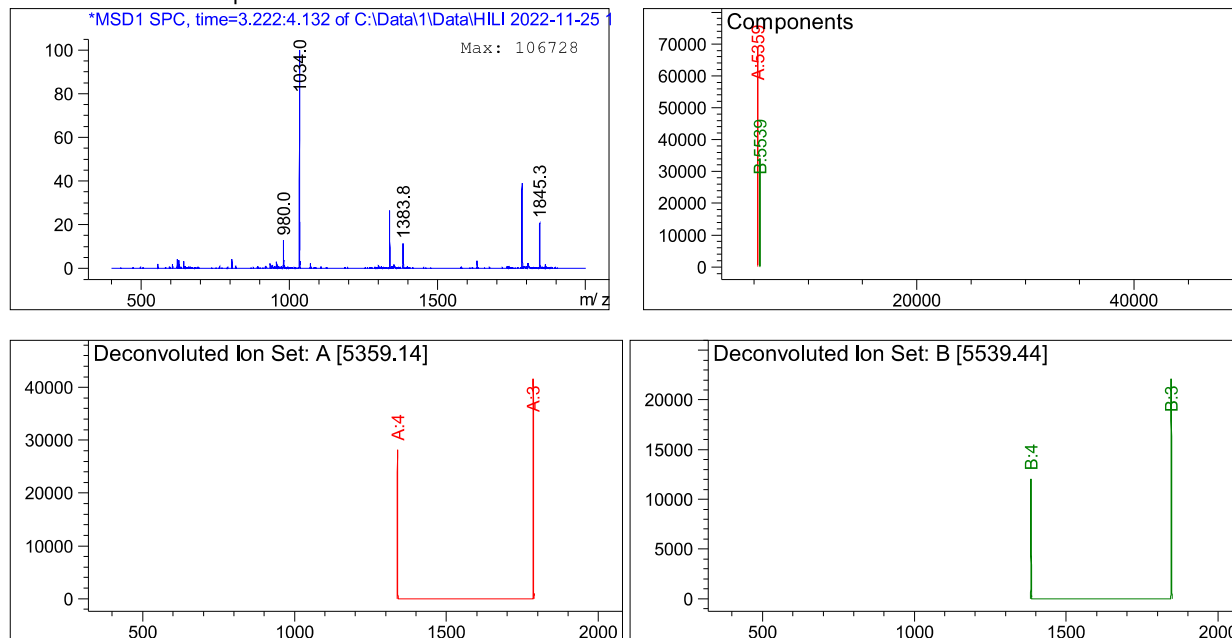

| Component | Molecular Weight | Absolute Abundance | Relative Abundance |
|-----------|------------------|--------------------|--------------------|
| A         | 5359.14          | 69043              | 100.00             |
| B         | 5539.44          | 34104              | 49.40              |

Figure S19. Deconvoluted LCMS data for 3a (100 nmol)

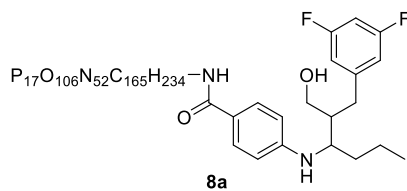

Molecular Weight: 5529.9118

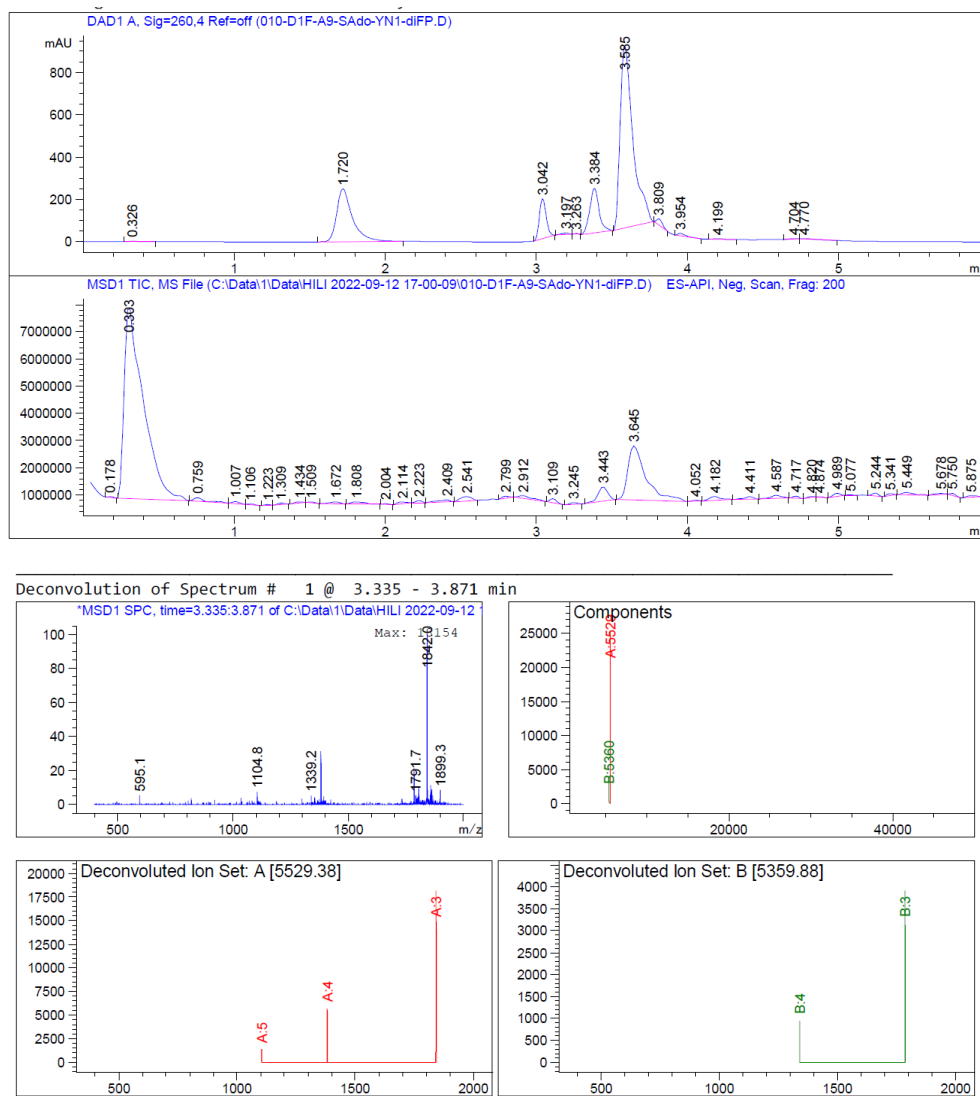

| Component | Molecular Weight | Absolute Abundance | Relative Abundance |
|-----------|------------------|--------------------|--------------------|
| A         | 5529.38          | 25190              | 100.00             |
| B         | 5359.88          | 4027               | 15.99              |

**Figure S20. Deconvoluted LCMS data for 8a**

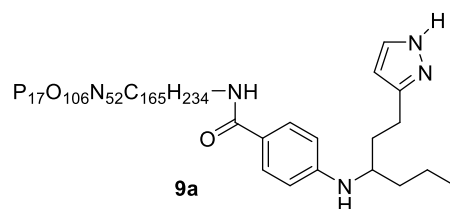

Molecular Weight: 5453.8700

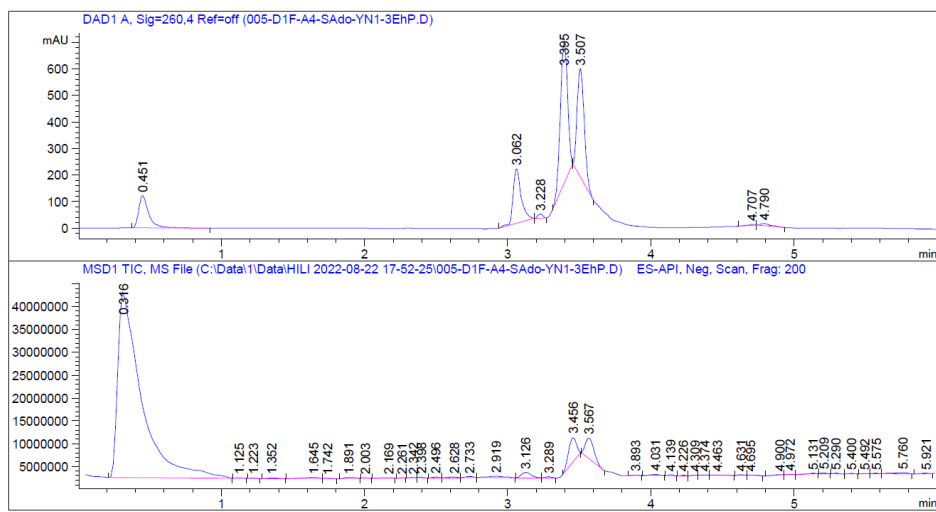

Deconvolution of Spectrum # 1 @ 3.417 - 3.742 min

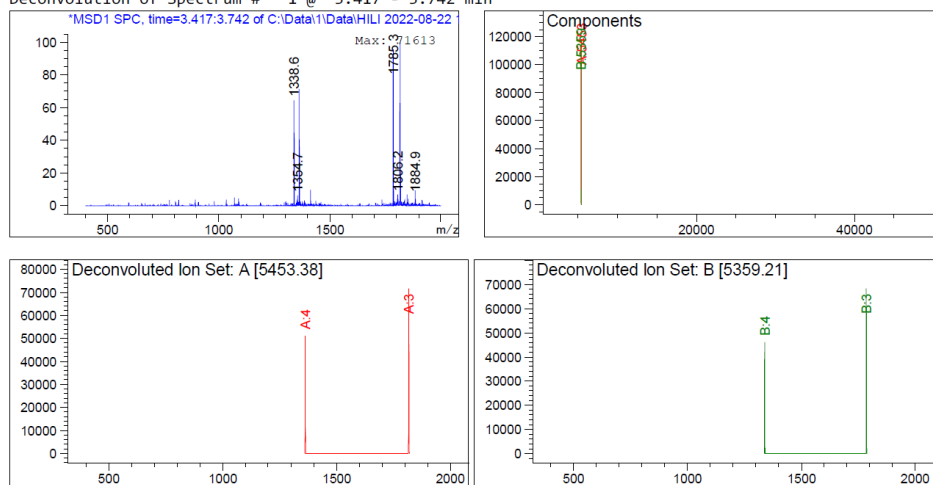

| Component | Molecular Weight | Absolute Abundance | Relative Abundance |
|-----------|------------------|--------------------|--------------------|
| A         | 5453.38          | 117571             | 100.00             |
| B         | 5359.21          | 112927             | 96.05              |

**Figure S21.** Deconvoluted LCMS data for **9a**

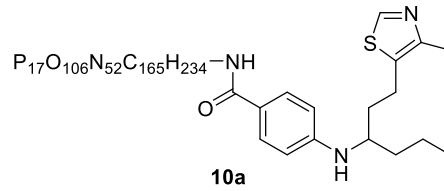

Molecular Weight: 5484.9420

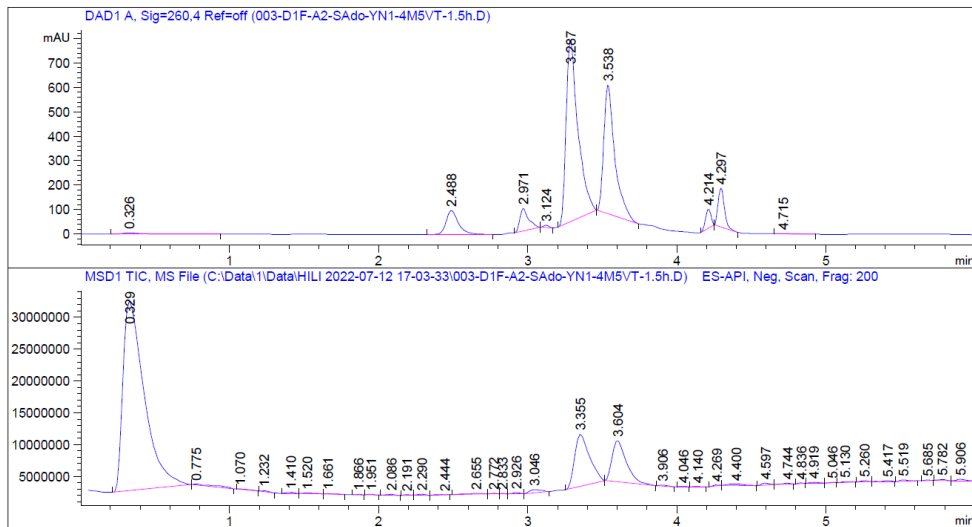

Deconvolution of Spectrum # 1 @ 2.945 - 3.888 min

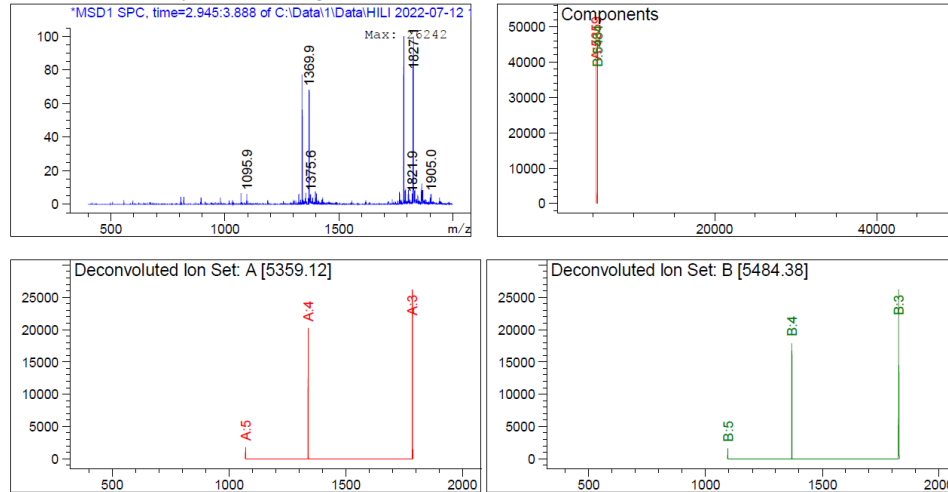

| Component | Molecular Weight | Absolute Abundance | Relative Abundance |
|-----------|------------------|--------------------|--------------------|
| A         | 5359.12          | 47998              | 100.00             |
| B         | 5484.38          | 45285              | 94.35              |

**Figure S22.** Deconvoluted LCMS data for **10a**

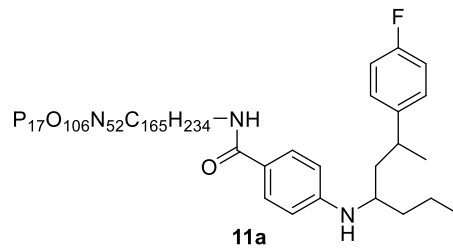

Molecular Weight: 5495.9224

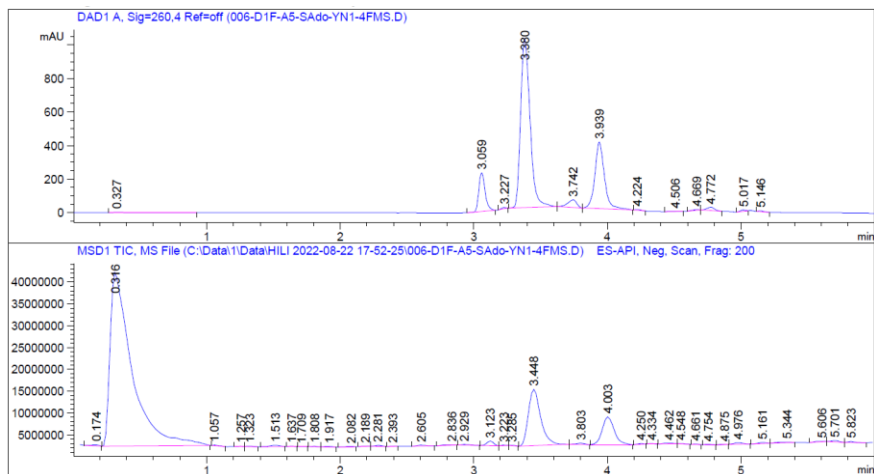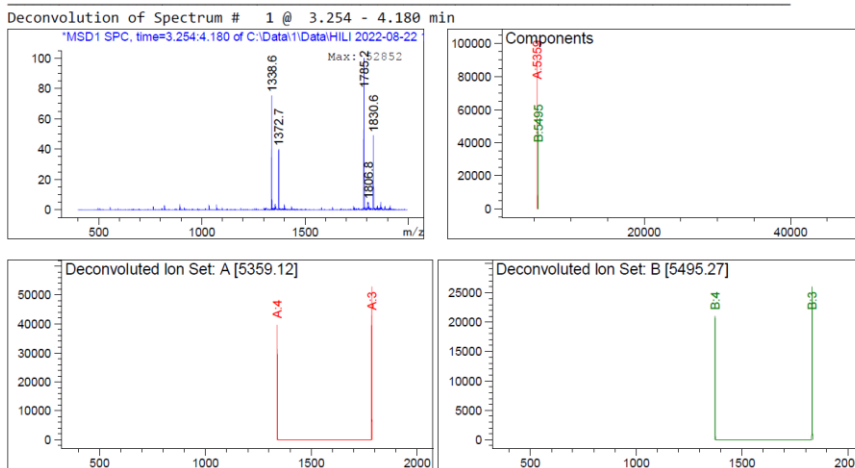

| Component | Molecular Weight | Absolute Abundance | Relative Abundance |
|-----------|------------------|--------------------|--------------------|
| A         | 5359.12          | 92400              | 100.00             |
| B         | 5495.27          | 47097              | 50.97              |

**Figure S23.** Deconvoluted LCMS data for **11a**

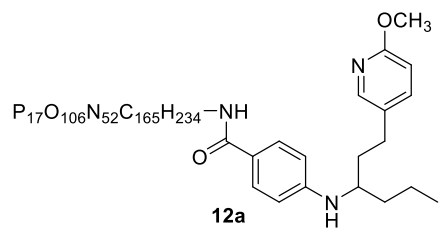

Molecular Weight: 5494.9190

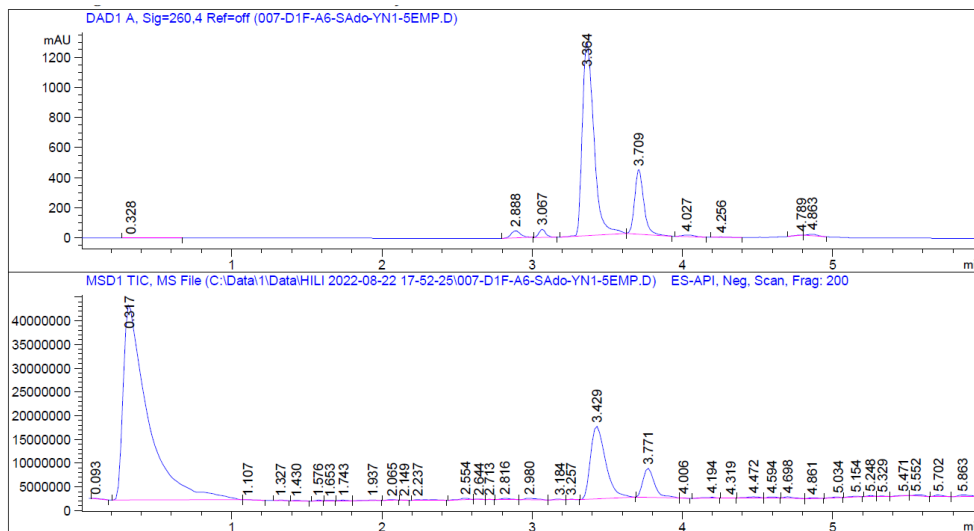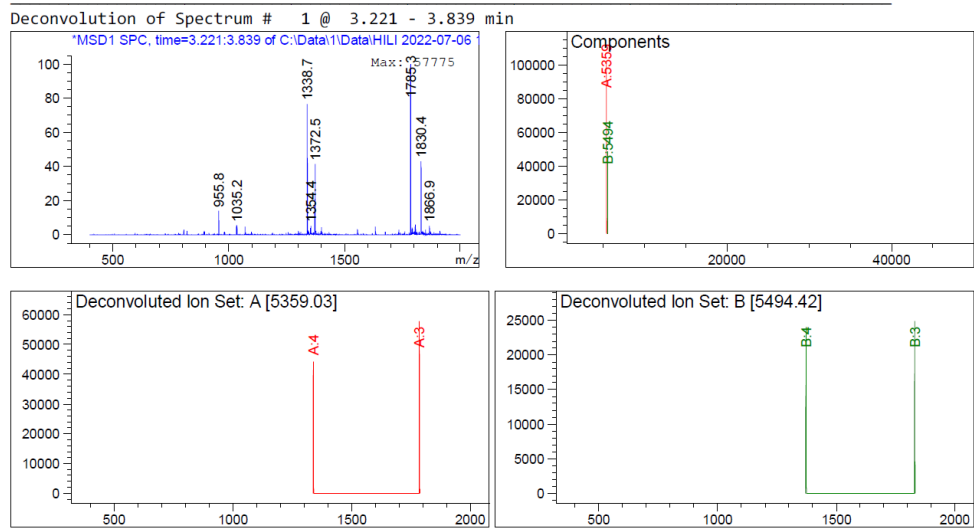

| Component | Molecular Weight | Absolute Abundance | Relative Abundance |
|-----------|------------------|--------------------|--------------------|
| A         | 5359.03          | 101842             | 100.00             |
| B         | 5494.42          | 48620              | 47.74              |

**Figure S24.** Deconvoluted LCMS data for **12a**

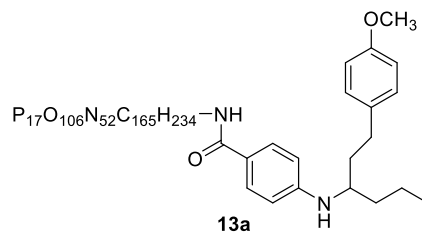

Molecular Weight: 5493.9310

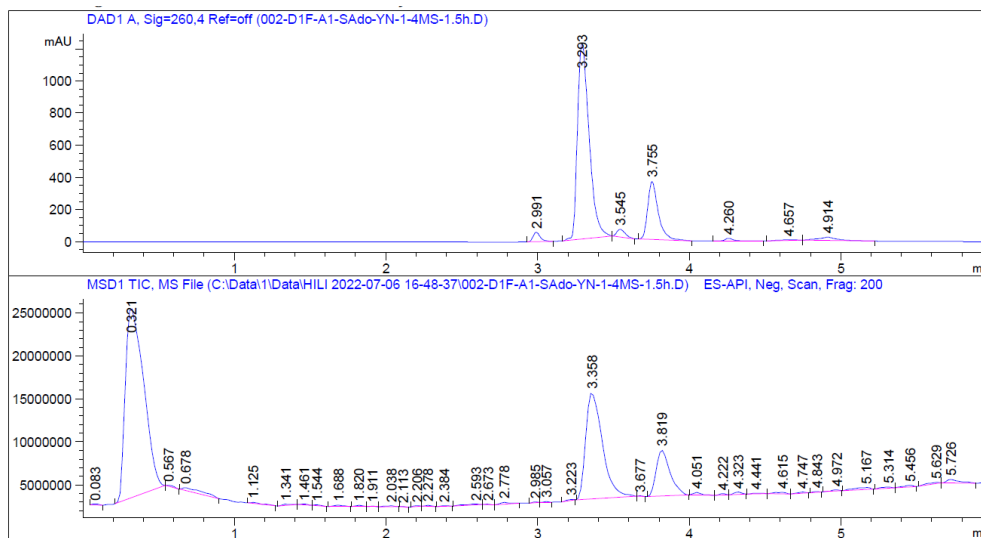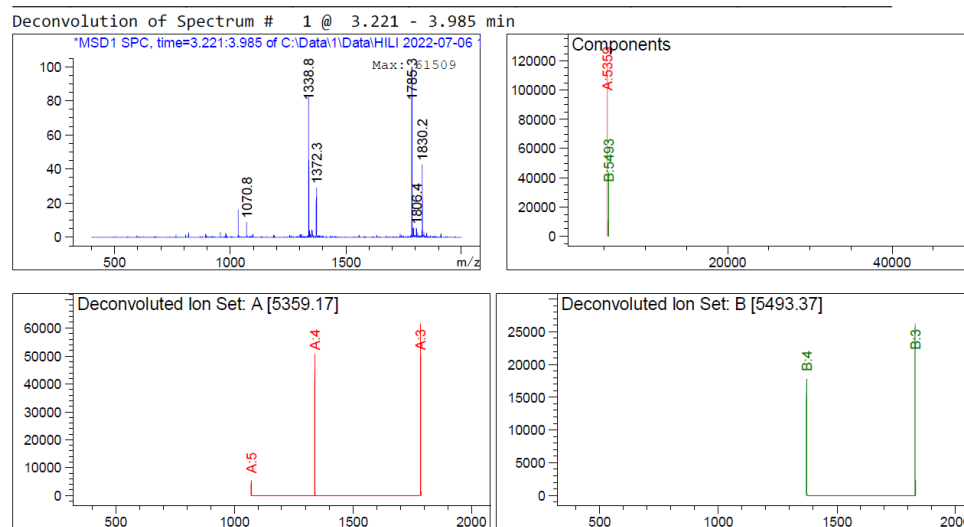

| Component | Molecular Weight | Absolute Abundance | Relative Abundance |
|-----------|------------------|--------------------|--------------------|
| A         | 5359.17          | 117613             | 100.00             |
| B         | 5493.37          | 43497              | 36.98              |

**Figure S25.** Deconvoluted LCMS data for **13a**



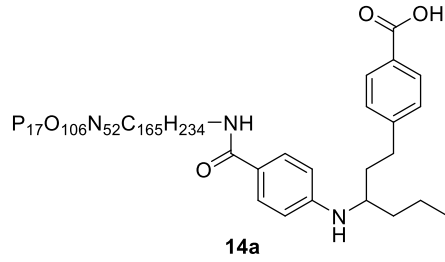

Molecular Weight: 5507.9140

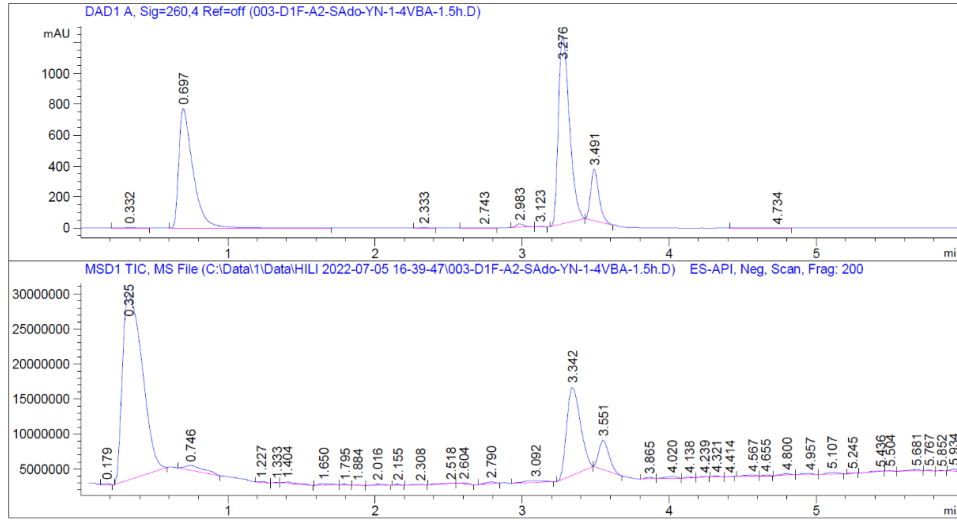

Deconvolution of Spectrum # 1 @ 2.929 - 3.774 min

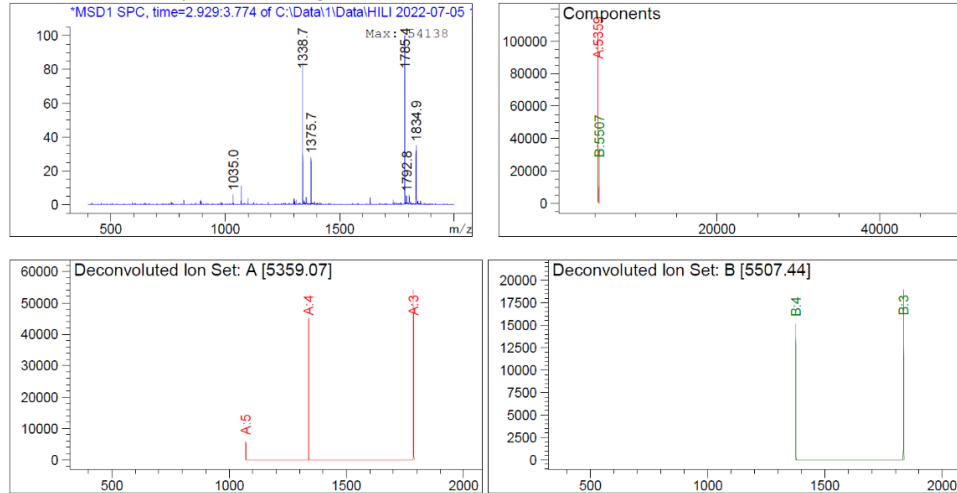

| Component | Molecular Weight | Absolute Abundance | Relative Abundance |
|-----------|------------------|--------------------|--------------------|
| A         | 5359.07          | 104935             | 100.00             |
| B         | 5507.44          | 33538              | 31.96              |

**Figure S26. Deconvoluted LCMS data for 14a**

## LCMS spectra and deconvolution results for 1b derivatives

**Table S3:** Hydroaminoalkylation of various vinylarenes with DNA conjugate **1b**

|                  | Starting Material ( <b>1b</b> ) | Single Addition  | Double Addition | Triple Addition |
|------------------|---------------------------------|------------------|-----------------|-----------------|
| <b>1b</b> +4VP   | -                               | <b>4b</b> : 58%  | 31%             | 11%             |
| <b>1b</b> +4CS   | -                               | <b>7b</b> : 72%  | 28%             | -               |
| <b>1b</b> +2BrS  | -                               | <b>5b</b> : 79%  | 21%             | -               |
| <b>1b</b> +2VhB  | -                               | <b>6b</b> : 79%  | 21%             | -               |
| <b>1b</b> +DPE   | -                               | <b>3b</b> : 86%  | 14%             | -               |
| <b>1b</b> +diFP  | -                               | <b>8b</b> : 83%  | 17%             | -               |
| <b>1b</b> +4M5VT | 27%                             | <b>10b</b> : 67% | 6%              | -               |
| <b>1b</b> +4FMS  | 33%                             | <b>11b</b> : 67% | -               | -               |
| <b>1b</b> +3EhP  | 39%                             | <b>9b</b> : 61%  | -               | -               |
| <b>1b</b> +5EMP  | 47%                             | <b>12b</b> : 53% | -               | -               |
| <b>1b</b> +4MS   | 48%                             | <b>13b</b> : 52% | -               | -               |
| <b>1b</b> +4VBA  | 67%                             | <b>14b</b> : 33% | -               | -               |
| <b>1b</b> +4AS   | 100%                            | -                | -               | -               |

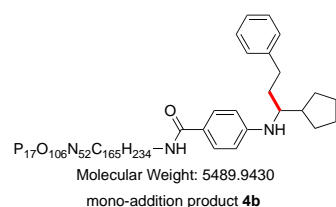

possible double-addition byproduct

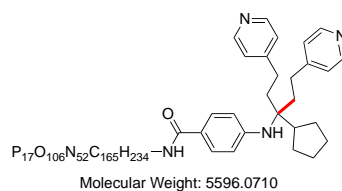

possible triple-addition byproduct

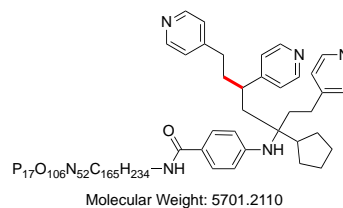

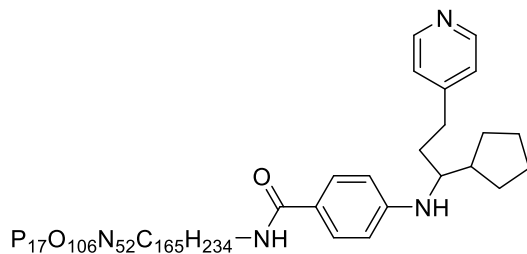

**4b**

Molecular Weight: 5490.9310

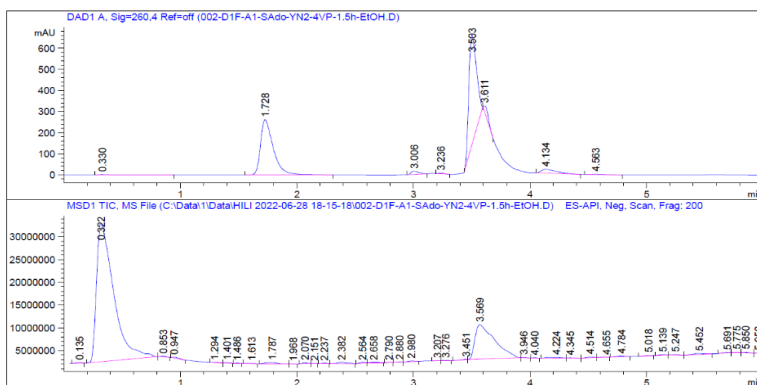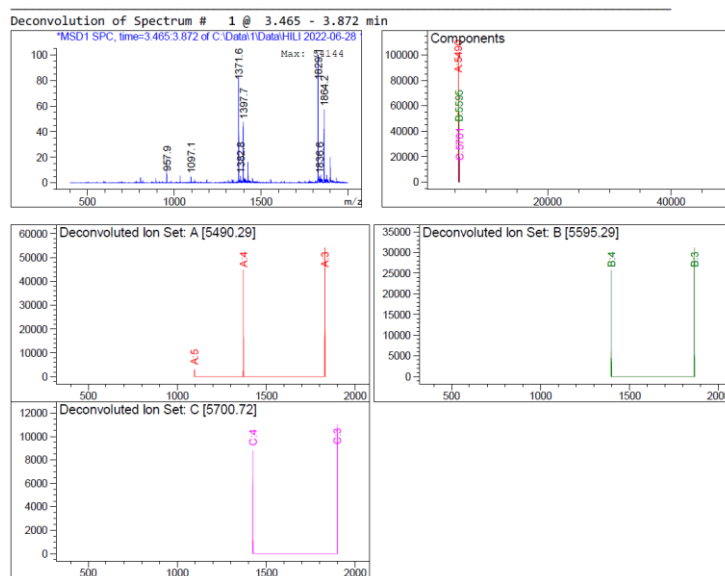

| Component | Molecular Weight | Absolute Abundance | Relative Abundance |
|-----------|------------------|--------------------|--------------------|
| A         | 5490.29          | 101564             | 100.00             |
| B         | 5595.29          | 55558              | 54.70              |
| C         | 5700.72          | 19660              | 19.36              |

**Figure S27.** Deconvoluted LCMS data for **4b**

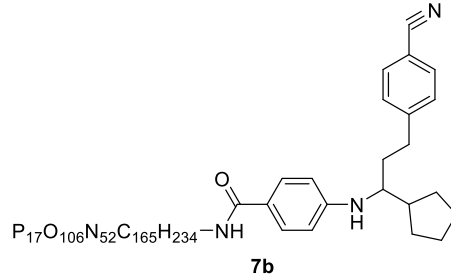

Molecular Weight: 5514.9530

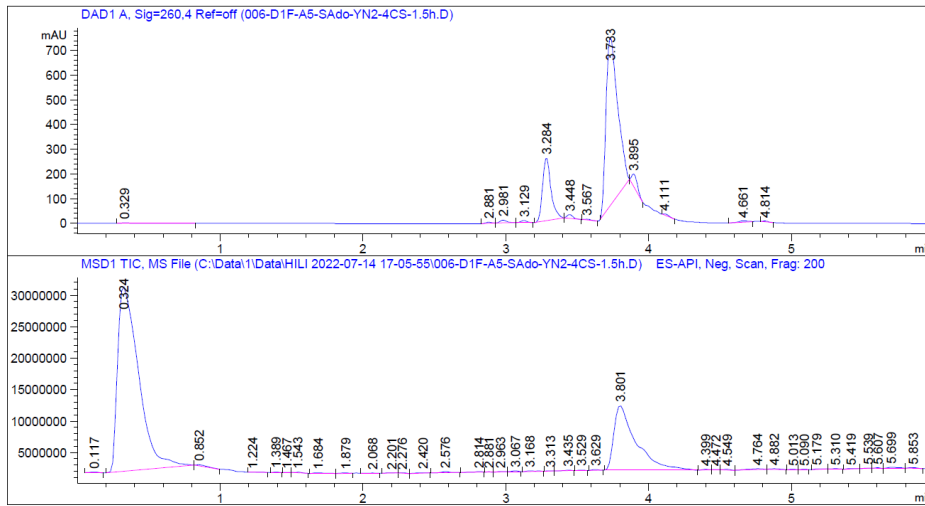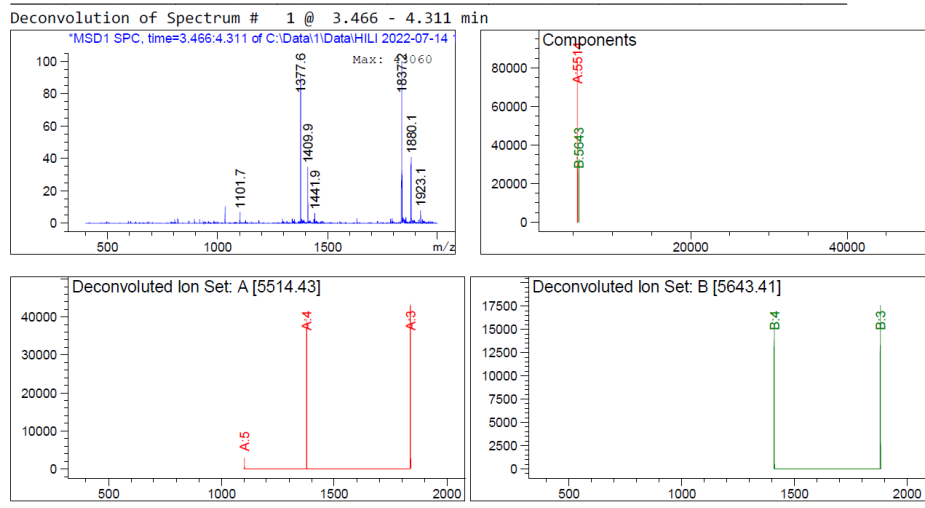

| Component | Molecular Weight | Absolute Abundance | Relative Abundance |
|-----------|------------------|--------------------|--------------------|
| A         | 5514.43          | 84625              | 100.00             |
| B         | 5643.41          | 32524              | 38.43              |

**Figure S28.** Deconvoluted LCMS data for **7b**

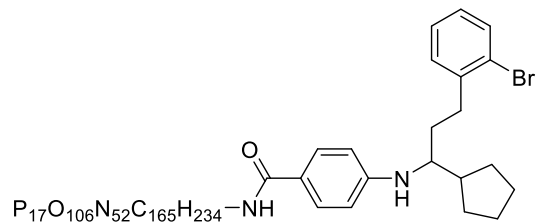

**5b**

Molecular Weight: 5568.8390

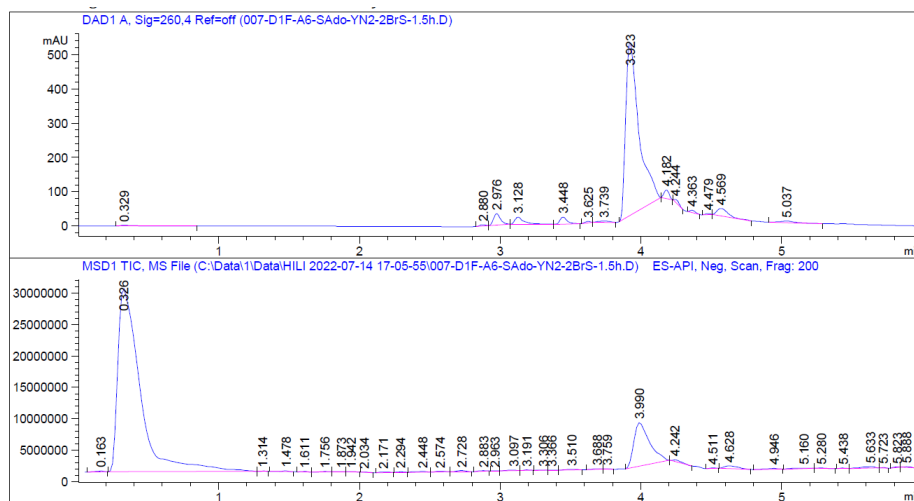

Deconvolution of Spectrum # 1 @ 3.840 - 4.555 min

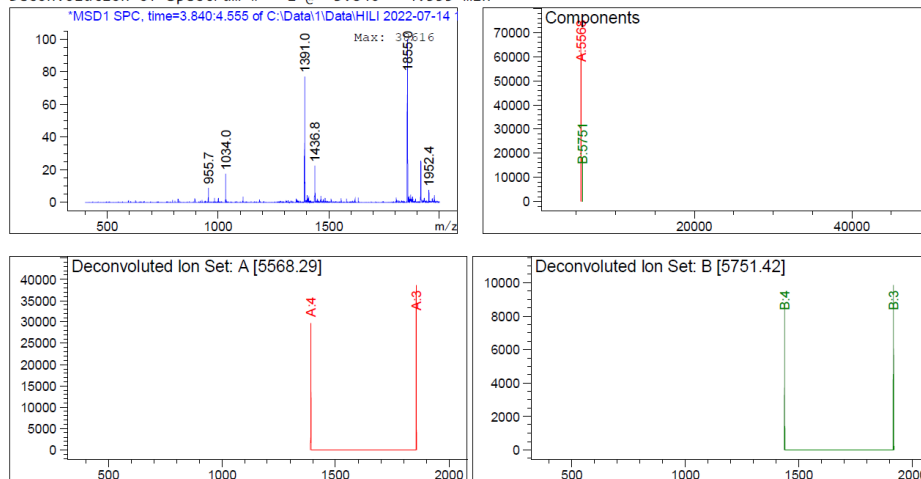

| Component | Molecular Weight | Absolute Abundance | Relative Abundance |
|-----------|------------------|--------------------|--------------------|
| A         | 5568.29          | 68333              | 100.00             |
| B         | 5751.42          | 18060              | 26.43              |

**Figure S29.** Deconvoluted LCMS data for **5b**

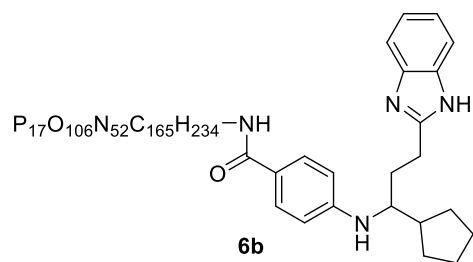

Molecular Weight: 5529.9680

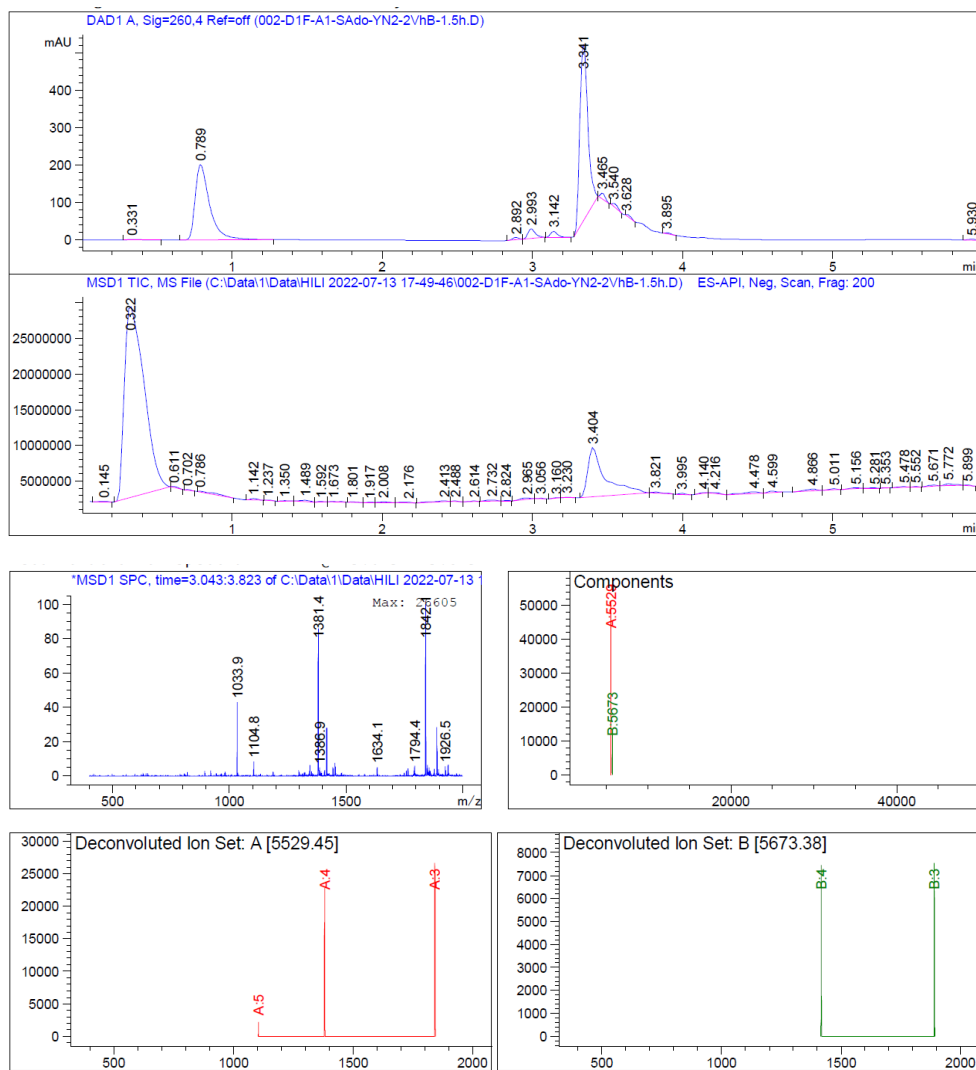

| Component | Molecular Weight | Absolute Abundance | Relative Abundance |
|-----------|------------------|--------------------|--------------------|
| A         | 5529.45          | 51037              | 100.00             |
| B         | 5673.38          | 13581              | 26.61              |

**Figure S30.** Deconvoluted LCMS data for **6b**

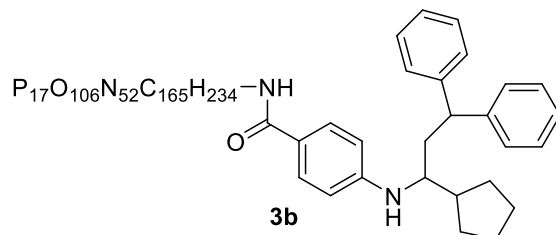

Molecular Weight: 5566.0410

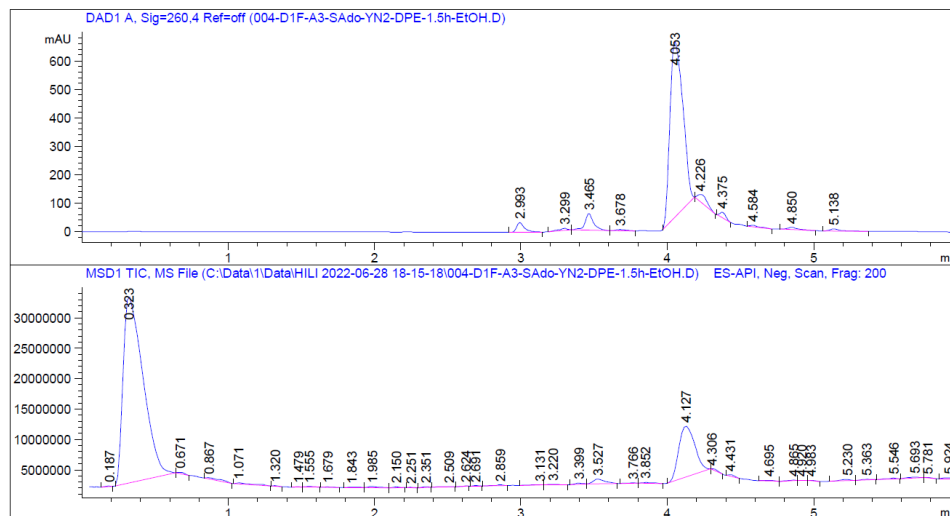

Deconvolution of Spectrum # 1 @ 3.222 - 4.587 min

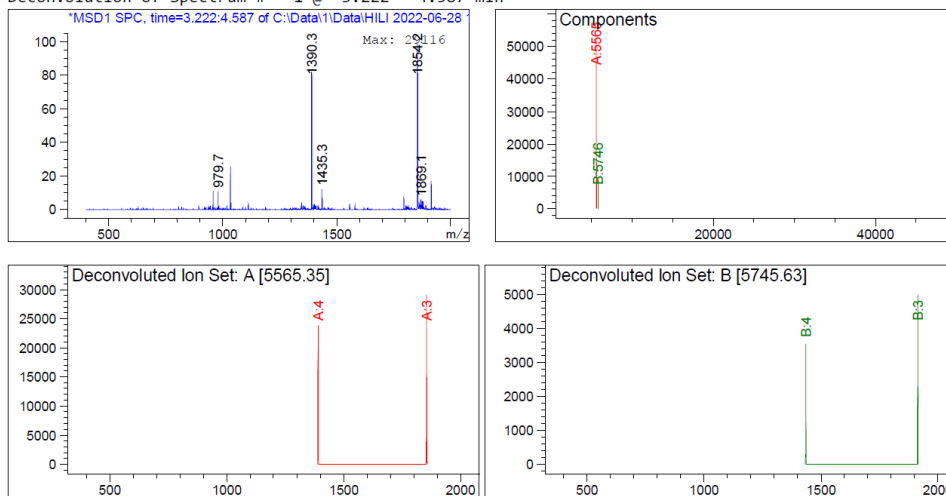

| Component | Molecular Weight | Absolute Abundance | Relative Abundance |
|-----------|------------------|--------------------|--------------------|
| A         | 5565.35          | 52284              | 100.00             |
| B         | 5745.63          | 8516               | 16.29              |

**Figure S31.** Deconvoluted LCMS data for **3b**

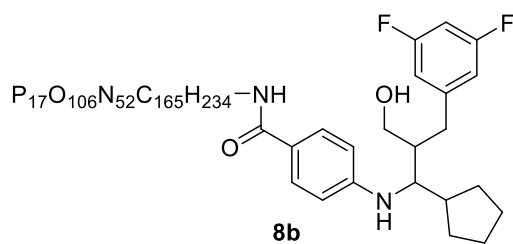

**8b**

Molecular Weight: 5555.9498

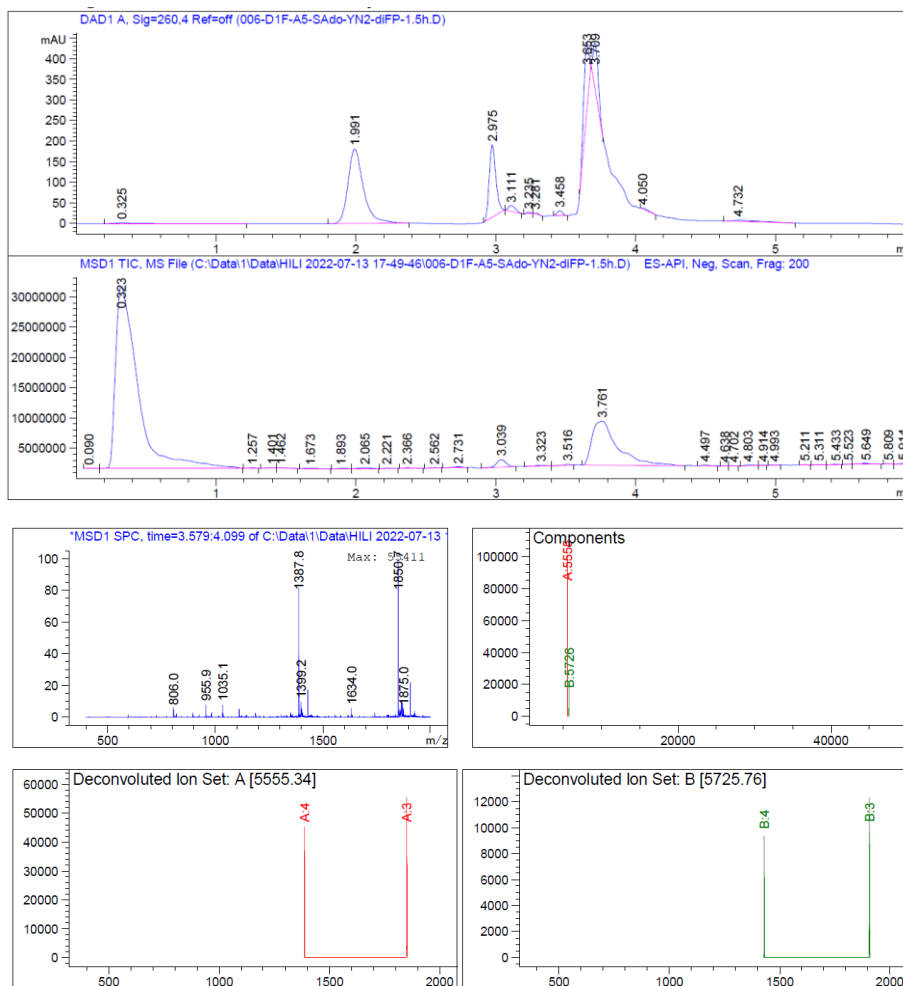

| Component | Molecular Weight | Absolute Abundance | Relative Abundance |
|-----------|------------------|--------------------|--------------------|
| A         | 5555.34          | 100210             | 100.00             |
| B         | 5725.76          | 20673              | 20.63              |

**Figure S32.** Deconvoluted LCMS data for **8b**



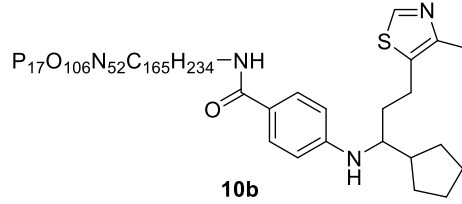

Molecular Weight: 5510.9800

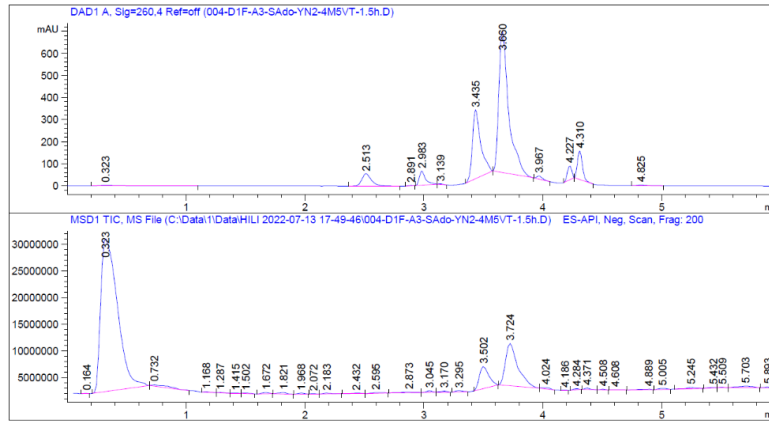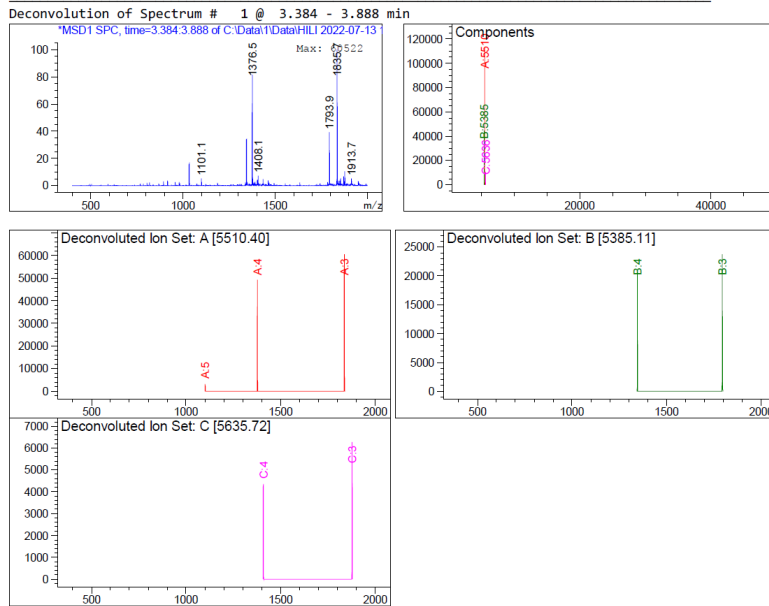

| Component | Molecular Weight | Absolute Abundance | Relative Abundance |
|-----------|------------------|--------------------|--------------------|
| A         | 5510.40          | 112765             | 100.00             |
| B         | 5385.11          | 44314              | 39.30              |
| C         | 5635.72          | 9991               | 8.86               |

**Figure S33.** Deconvoluted LCMS data for **10b**

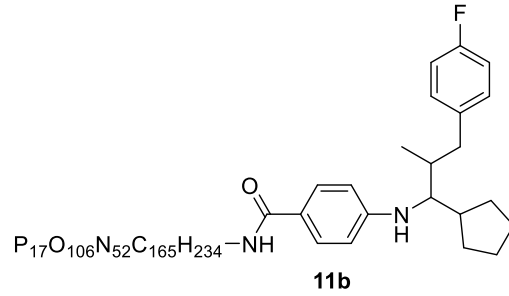

Molecular Weight: 5521.9604

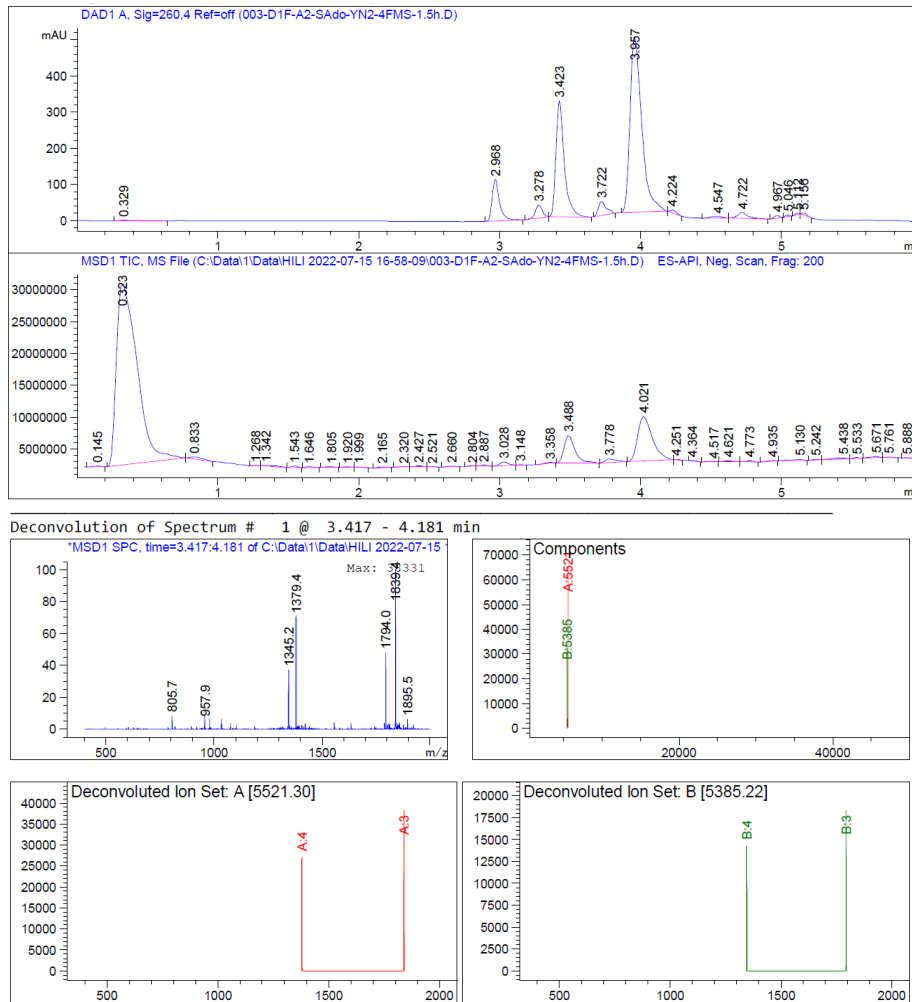

| Component | Molecular Weight | Absolute Abundance | Relative Abundance |
|-----------|------------------|--------------------|--------------------|
| A         | 5521.30          | 65013              | 100.00             |
| B         | 5385.22          | 32602              | 50.15              |

**Figure S34. Deconvoluted LCMS data for 11b**

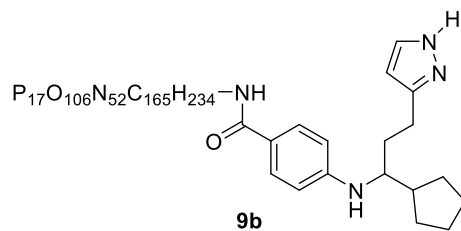

Molecular Weight: 5479.9080

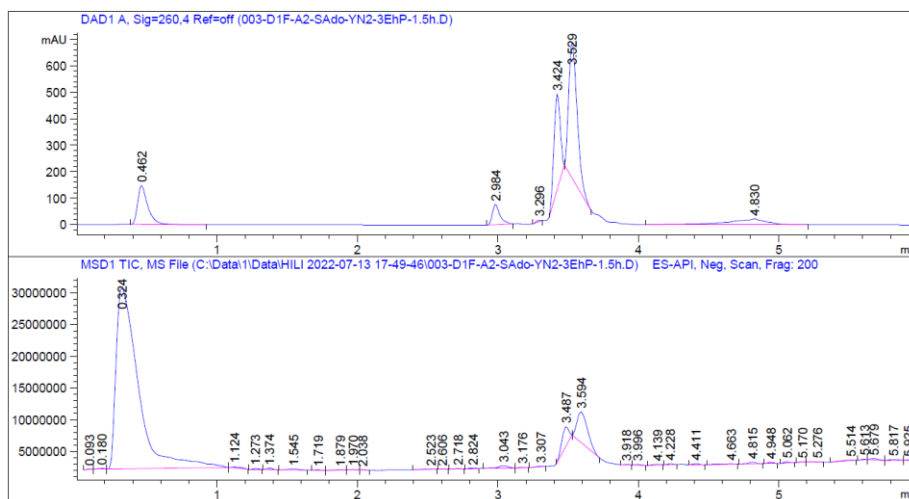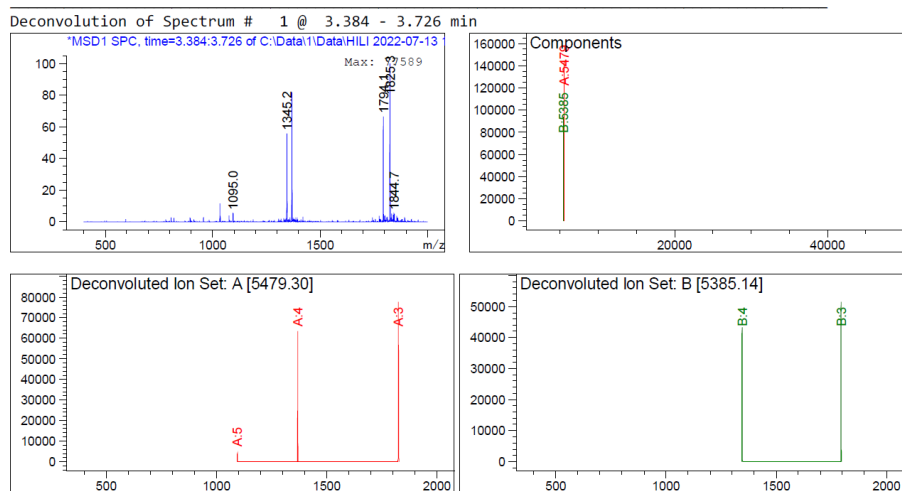

| Component | Molecular Weight | Absolute Abundance | Relative Abundance |
|-----------|------------------|--------------------|--------------------|
| A         | 5479.30          | 143998             | 100.00             |
| B         | 5385.14          | 93740              | 65.10              |

**Figure S35. Deconvoluted LCMS data for 9b**

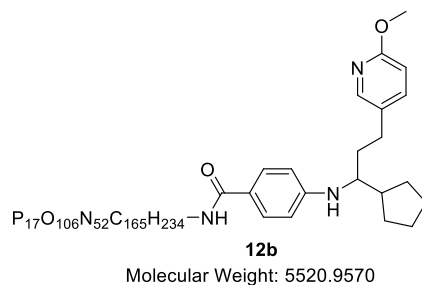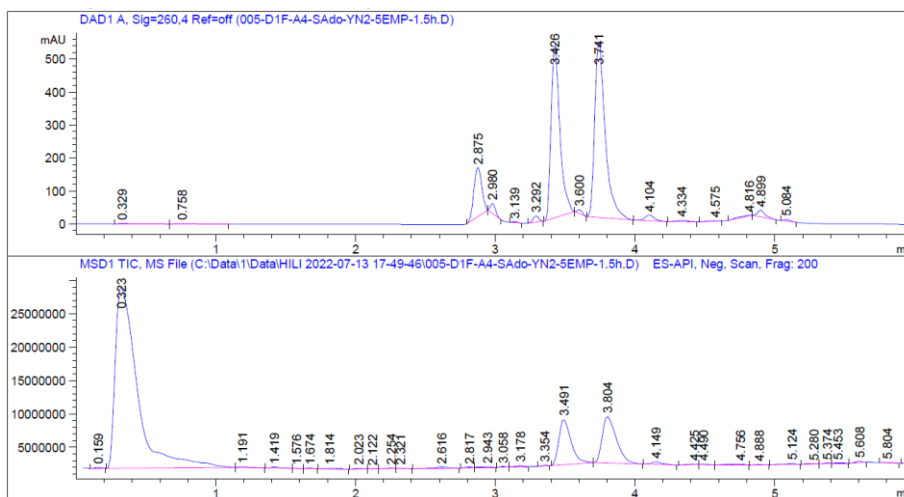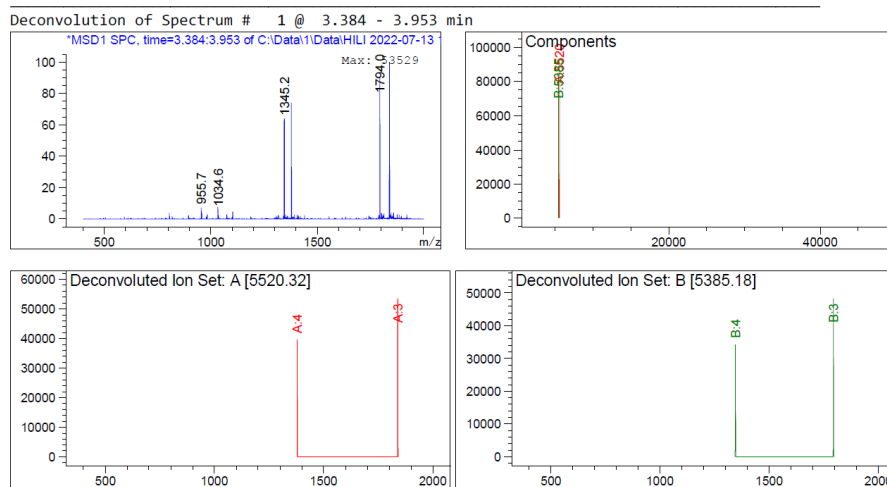

| Component | Molecular Weight | Absolute Abundance | Relative Abundance |
|-----------|------------------|--------------------|--------------------|
| A         | 5520.32          | 92687              | 100.00             |
| B         | 5385.18          | 82469              | 88.98              |

**Figure S36. Deconvoluted LCMS data for 12b**

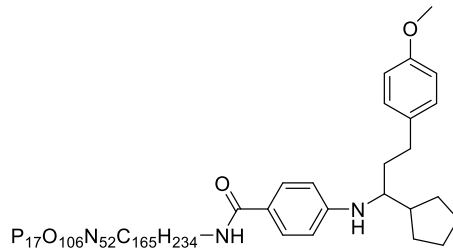

**13b**

Molecular Weight: 5519.9690

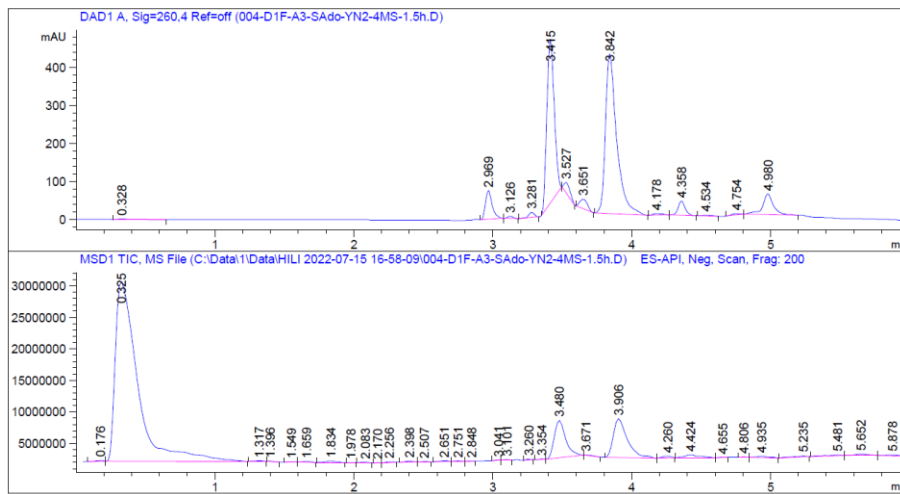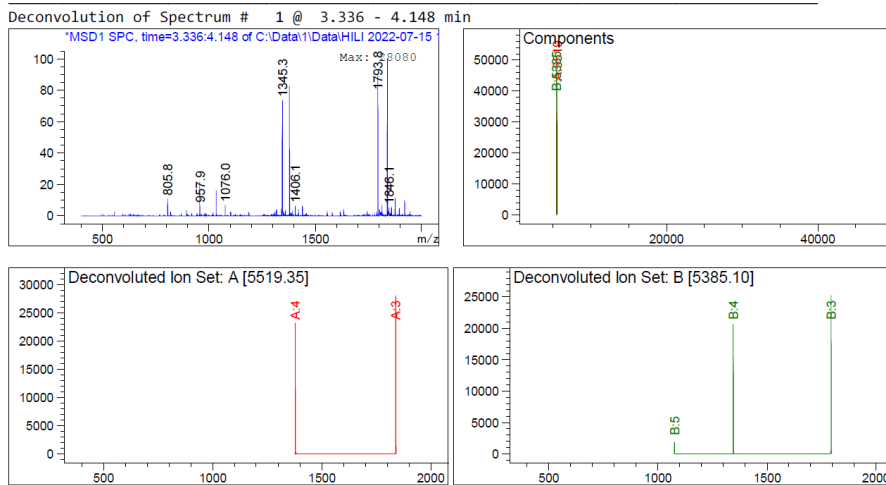

| Component | Molecular Weight | Absolute Abundance | Relative Abundance |
|-----------|------------------|--------------------|--------------------|
| A         | 5519.35          | 51096              | 100.00             |
| B         | 5385.10          | 47038              | 92.06              |

**Figure S37. Deconvoluted LCMS data for 13b**

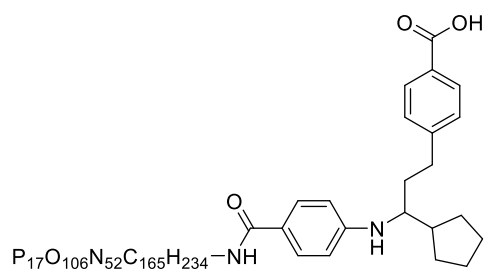

**14b**

Molecular Weight: 5533.9520

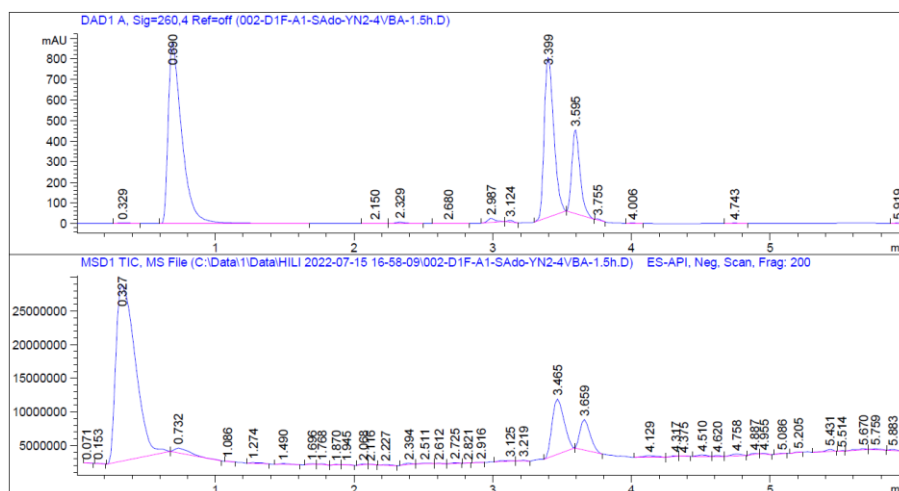

Deconvolution of Spectrum # 1 @ 3.287 - 3.774 min

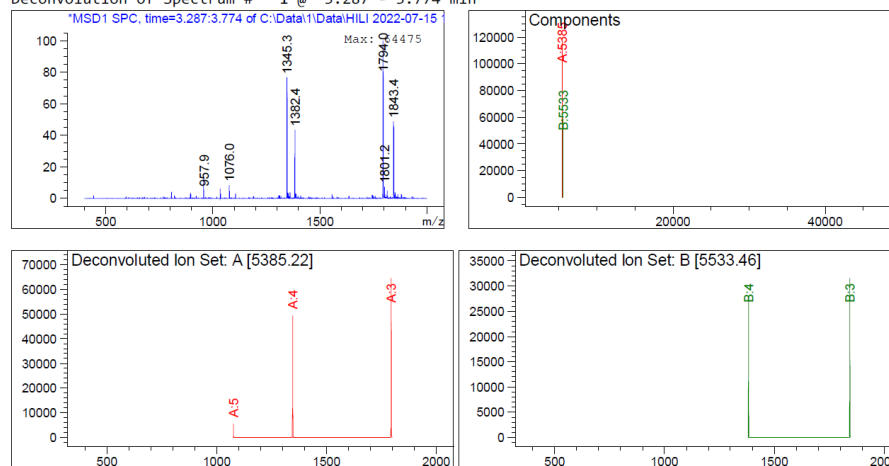

| Component | Molecular Weight | Absolute Abundance | Relative Abundance |
|-----------|------------------|--------------------|--------------------|
| A         | 5385.22          | 118981             | 100.00             |
| B         | 5533.46          | 59173              | 49.73              |

**Figure S38. Deconvoluted LCMS data for 14b**

## LCMS spectra and deconvolution results for 1c derivatives

**Table S4:** Hydroaminoalkylation of various vinylarenes with DNA conjugate **1c**

|                 | Starting Material ( <b>1c</b> ) | Single Addition | Double Addition | Triple Addition |
|-----------------|---------------------------------|-----------------|-----------------|-----------------|
| <b>1c+4VP</b>   | 69%                             | <b>4c:</b> 31%  | -               | -               |
| <b>1c+4CS</b>   | 83%                             | <b>7c:</b> 17%  | -               | -               |
| <b>1c+2VhB</b>  | 86%                             | <b>6c:</b> 14%  | -               | -               |
| <b>1c+2BrS</b>  | 88%                             | <b>5c:</b> 12%  | -               | -               |
| <b>1c+diFP</b>  | 89%                             | <b>8c:</b> 11%  | -               | -               |
| <b>1c+4M5VT</b> | 93%                             | <b>10c:</b> 7%  | -               | -               |
| <b>1c+DPE</b>   | 100%                            | <b>3c:</b> 0%   | -               | -               |
| <b>1c+4FMS</b>  | 100%                            | <b>11c:</b> 0%  | -               | -               |
| <b>1c+3EhP</b>  | 100%                            | <b>9c:</b> 0%   | -               | -               |
| <b>1c+5EMP</b>  | 100%                            | <b>12c:</b> 0%  | -               | -               |
| <b>1c+4MS</b>   | 100%                            | <b>13c:</b> 0%  | -               | -               |
| <b>1c+4VBA</b>  | 100%                            | <b>14c:</b> 0%  | -               | -               |
| <b>1c+4AS</b>   | 100%                            | -               | -               | -               |

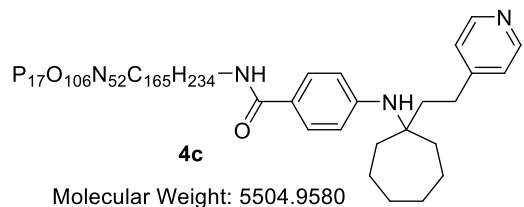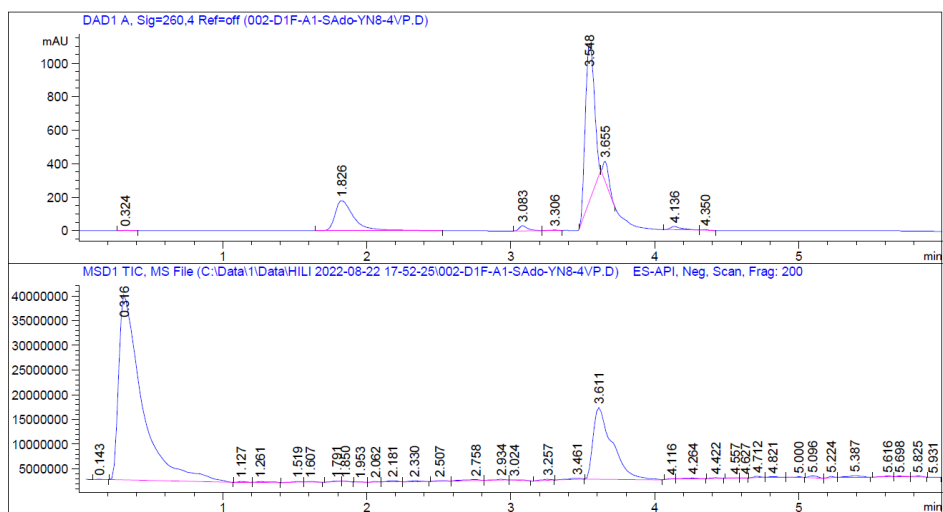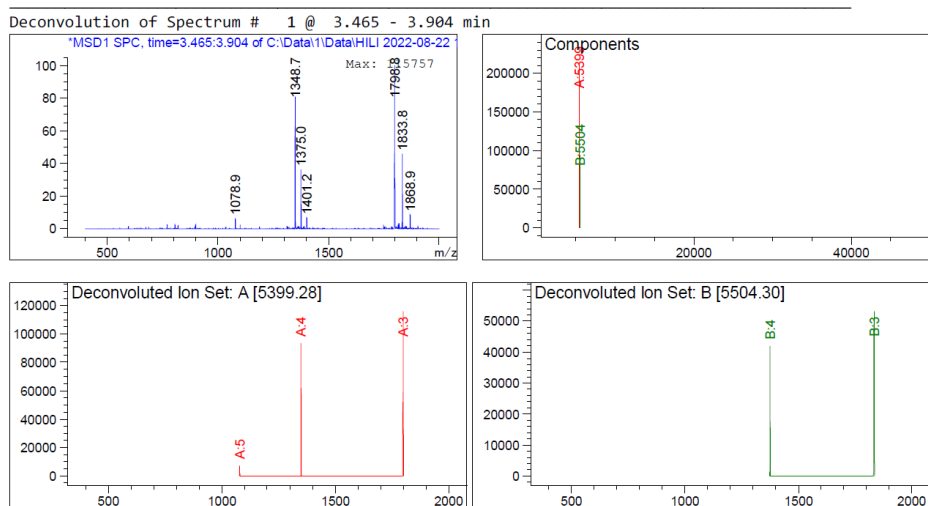

| Component | Molecular Weight | Absolute Abundance | Relative Abundance |
|-----------|------------------|--------------------|--------------------|
| A         | 5399.28          | 212905             | 100.00             |
| B         | 5504.30          | 94072              | 44.18              |

**Figure S39.** Deconvoluted LCMS data for **4c**



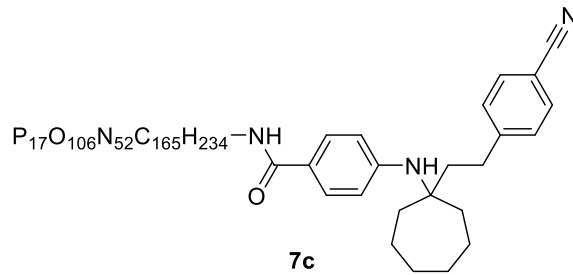

Molecular Weight: 5528.9800

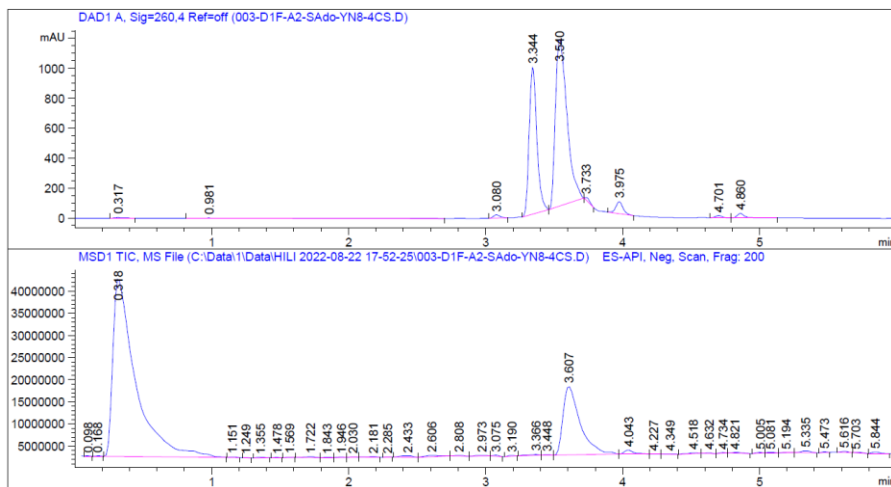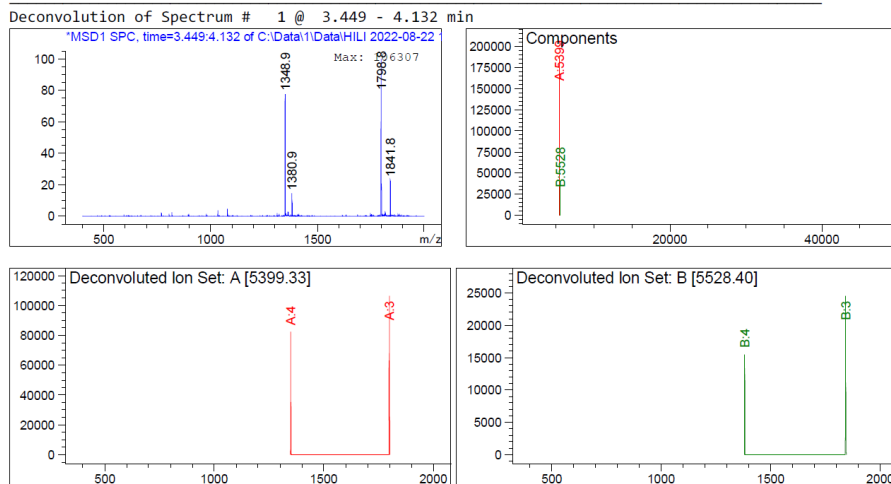

| Component | Molecular Weight | Absolute Abundance | Relative Abundance |
|-----------|------------------|--------------------|--------------------|
| A         | 5399.33          | 187971             | 100.00             |
| B         | 5528.40          | 39590              | 21.06              |

**Figure S40.** Deconvoluted LCMS data for **7c**

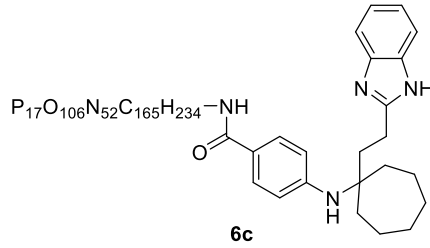

Molecular Weight: 5543.9950

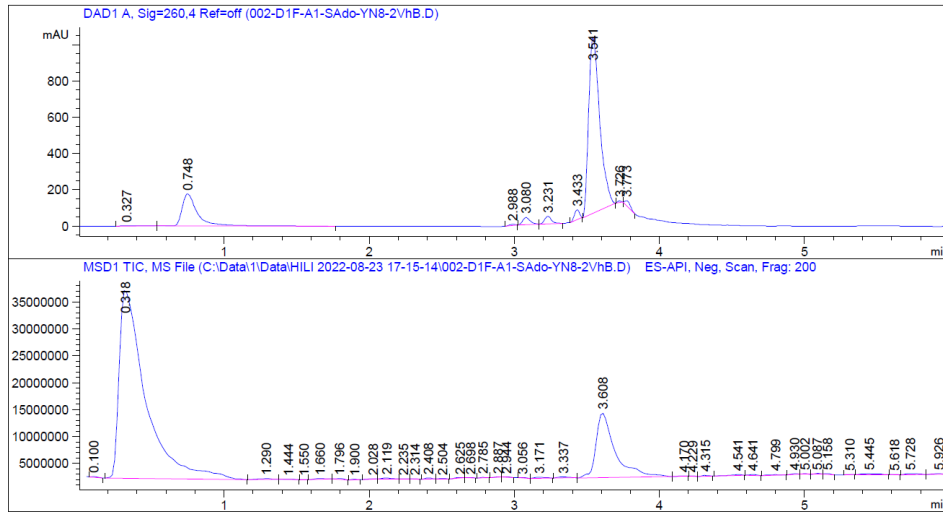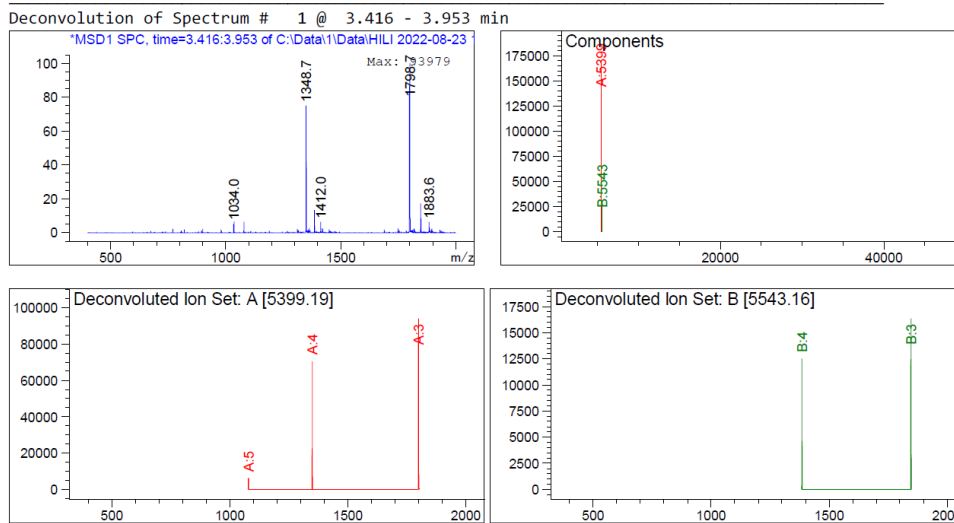

| Component | Molecular Weight | Absolute Abundance | Relative Abundance |
|-----------|------------------|--------------------|--------------------|
| A         | 5399.19          | 169927             | 100.00             |
| B         | 5543.16          | 28136              | 16.56              |

**Figure S41.** Deconvoluted LCMS data for **6c**

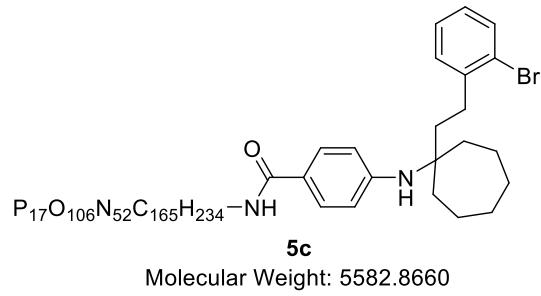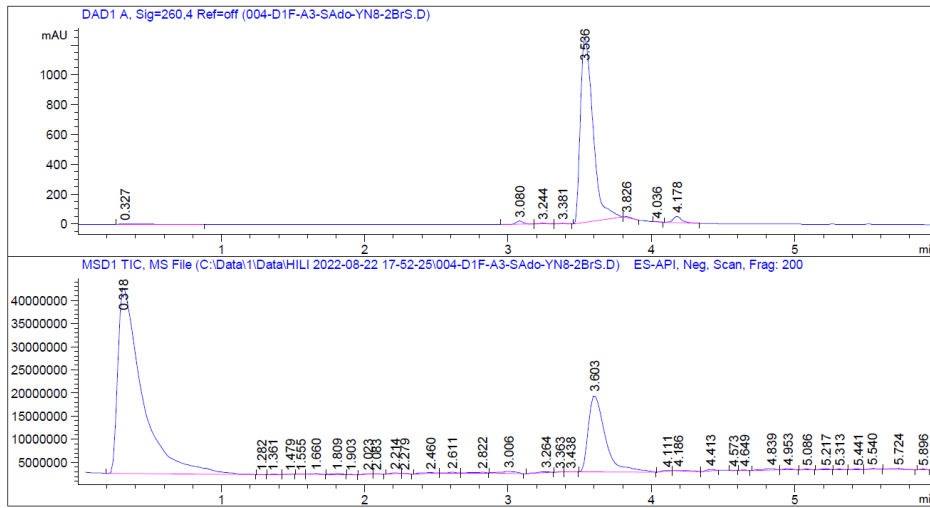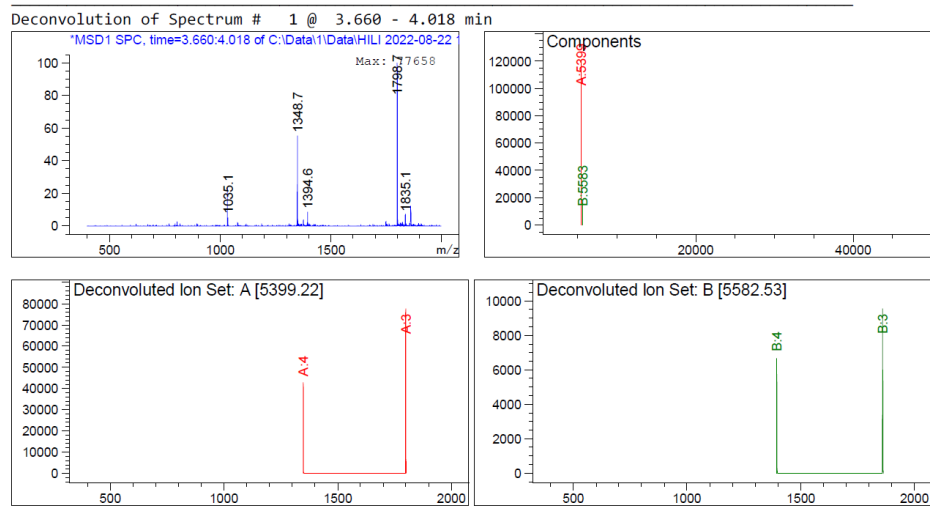

| Component | Molecular Weight | Absolute Abundance | Relative Abundance |
|-----------|------------------|--------------------|--------------------|
| A         | 5399.22          | 120466             | 100.00             |
| B         | 5582.53          | 15979              | 13.26              |

**Figure S42.** Deconvoluted LCMS data for **5c**

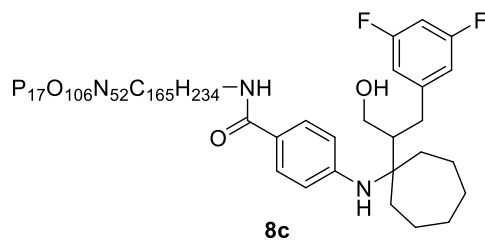

Molecular Weight: 5569.9768

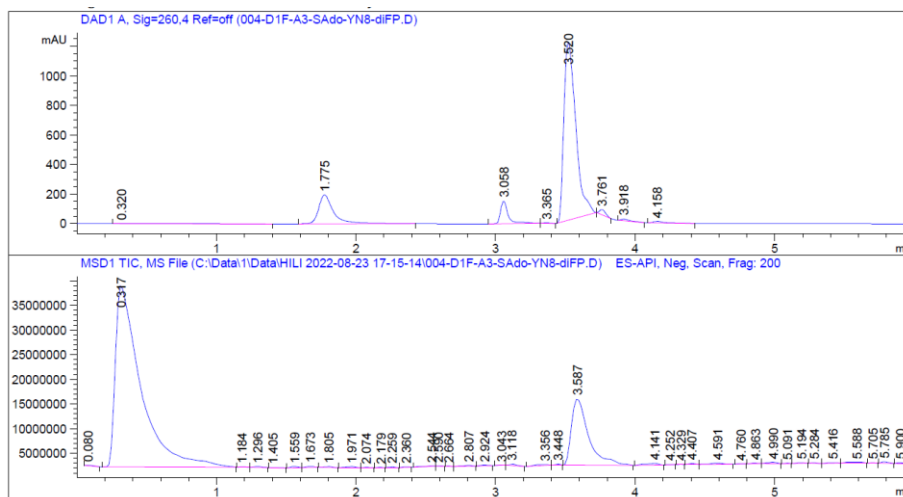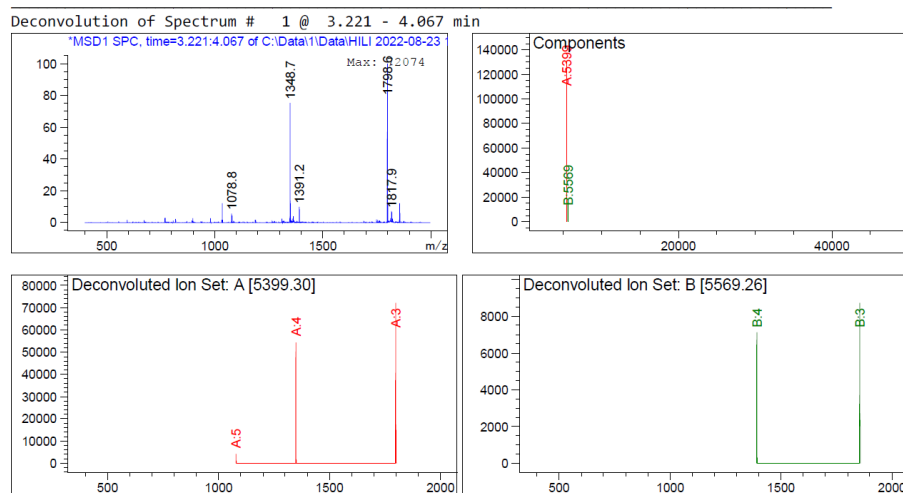

| Component | Molecular Weight | Absolute Abundance | Relative Abundance |
|-----------|------------------|--------------------|--------------------|
| A         | 5399.30          | 130458             | 100.00             |
| B         | 5569.26          | 15674              | 12.01              |

**Figure S43.** Deconvoluted LCMS data for **8c**

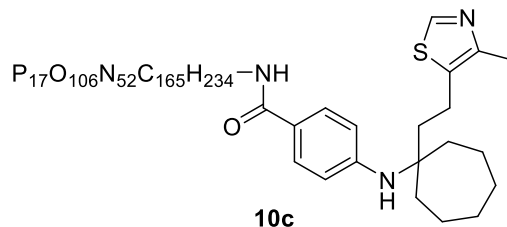

Molecular Weight: 5525.0070

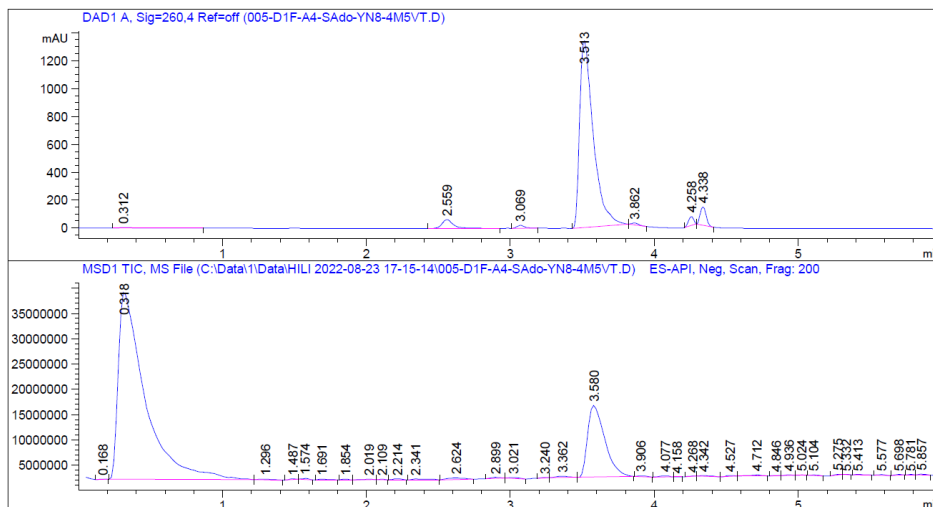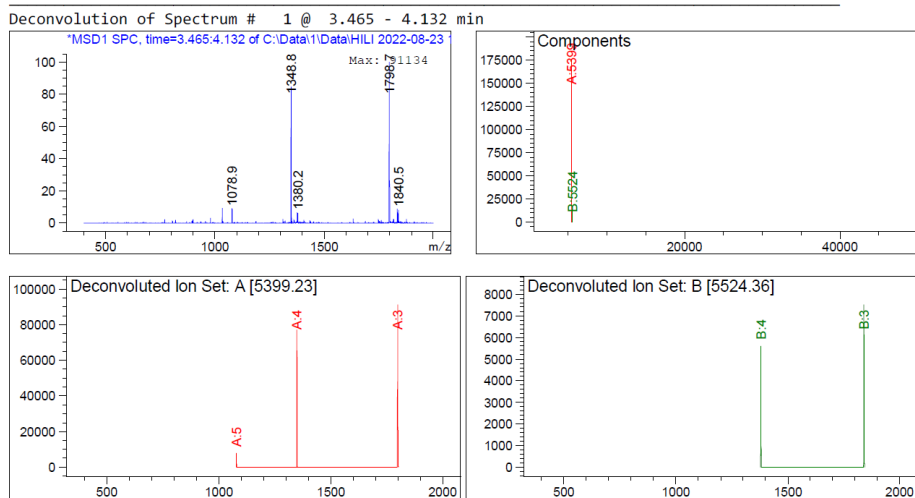

| Component | Molecular Weight | Absolute Abundance | Relative Abundance |
|-----------|------------------|--------------------|--------------------|
| A         | 5399.23          | 175435             | 100.00             |
| B         | 5524.36          | 13121              | 7.48               |

**Figure S44.** Deconvoluted LCMS data for **10c**

## LCMS spectra and deconvolution results for 1d derivatives

**Table S5:** Hydroaminoalkylation of various vinylarenes with DNA conjugate **1d**

|                  | Starting Material ( <b>1d</b> ) | Single Addition  | Double Addition | Triple Addition | Other                                |
|------------------|---------------------------------|------------------|-----------------|-----------------|--------------------------------------|
| <b>1d</b> +4VP   | -                               | <b>4d</b> : 68%  | 25%             | 7%              | -                                    |
| <b>1d</b> +4CS   | 13%                             | <b>7d</b> : 75%  | 12%             | -               | -                                    |
| <b>1d</b> +2BrS  | 60%                             | <b>5d</b> : 40%  | -               | -               | -                                    |
| <b>1d</b> +2VhB  | 44%                             | <b>6d</b> : 56%  | -               | -               | -                                    |
| <b>1d</b> +DPE   | 77%                             | <b>3d</b> : 23%  | -               | -               | -                                    |
| <b>1d</b> +4M5VT | 67%                             | <b>10d</b> : 33% | -               | -               | -                                    |
| <b>1d</b> +diFP  | 100%                            | <b>8d</b> : 0%   | -               | -               | -                                    |
| <b>1d</b> +4FMS  | 100%                            | <b>11d</b> : 0%  | -               | -               | -                                    |
| <b>1d</b> +3EhP  | 82%                             | <b>9d</b> : 0%   | -               | -               | <b>9d</b> -quinuclidine adduct: 18%  |
| <b>1d</b> +5EMP  | 100%                            | <b>12d</b> : 0%  | -               | -               | -                                    |
| <b>1d</b> +4MS   | 91%                             | <b>13d</b> : 0%  | -               | -               | <b>13d</b> -quinuclidine adduct: 9%  |
| <b>1d</b> +4VBA  | 90%                             | <b>14d</b> : 0%  | -               | -               | <b>14d</b> -quinuclidine adduct: 10% |
| <b>1d</b> +4AS   | 100%                            | -                | -               | -               | -                                    |

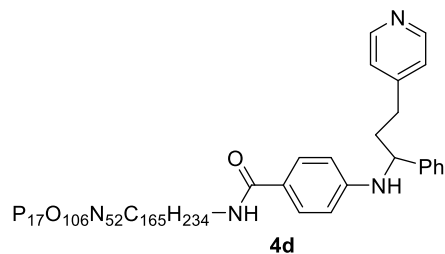

Molecular Weight: 5498.9100

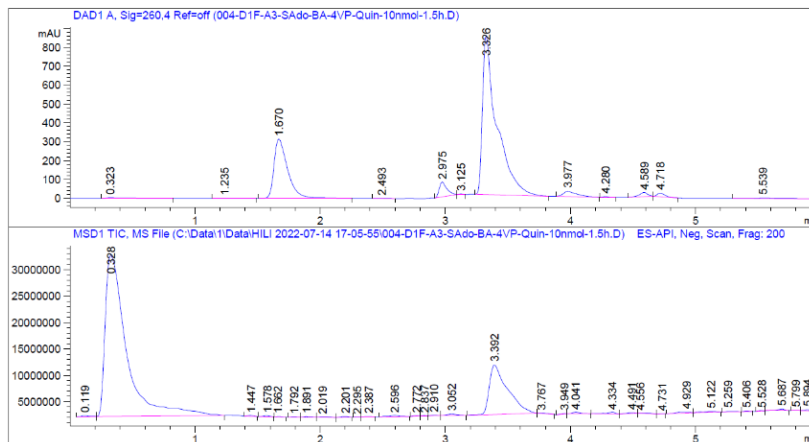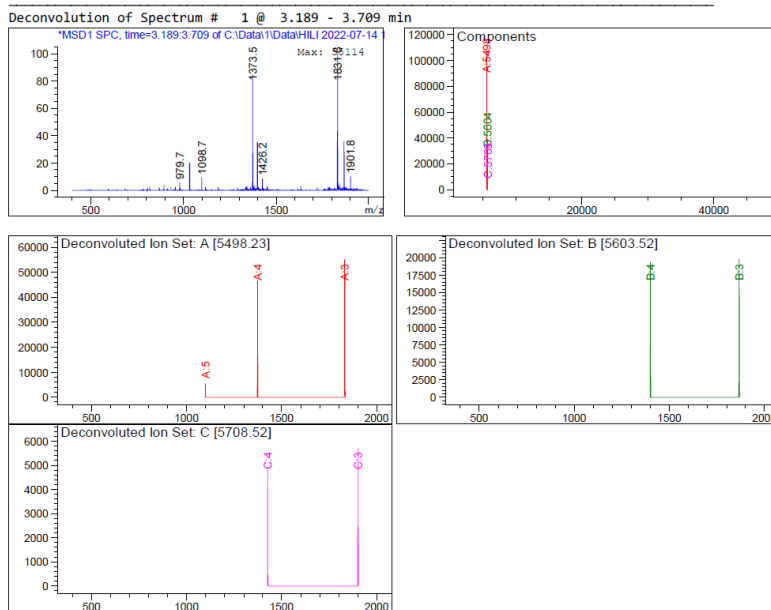

| Component | Molecular Weight | Absolute Abundance | Relative Abundance |
|-----------|------------------|--------------------|--------------------|
| A         | 5498.23          | 106623             | 100.00             |
| B         | 5603.52          | 38941              | 36.52              |
| C         | 5708.52          | 10481              | 9.83               |

**Figure S45.** Deconvoluted LCMS data for **4d**

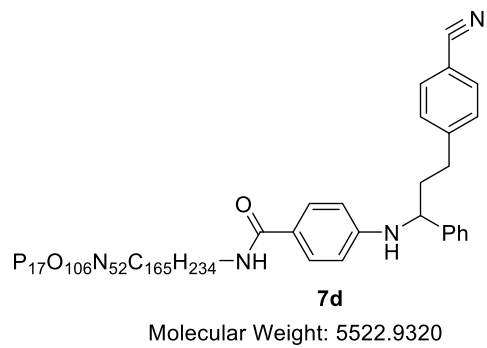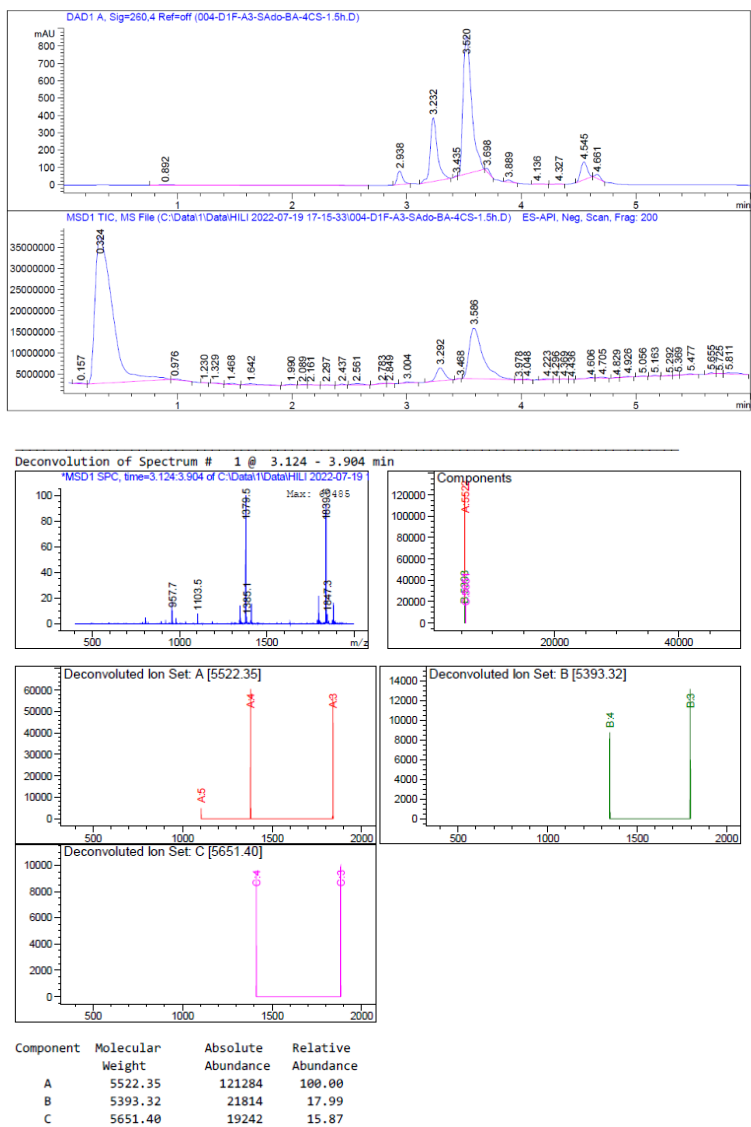

**Figure S46.** Deconvoluted LCMS data for **7d**





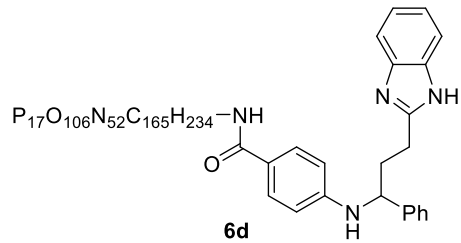

Molecular Weight: 5537.9470

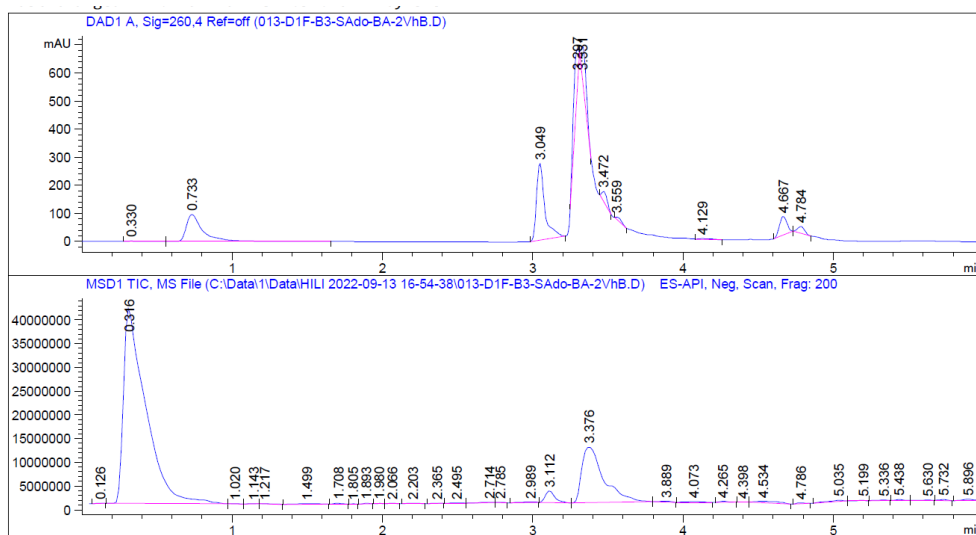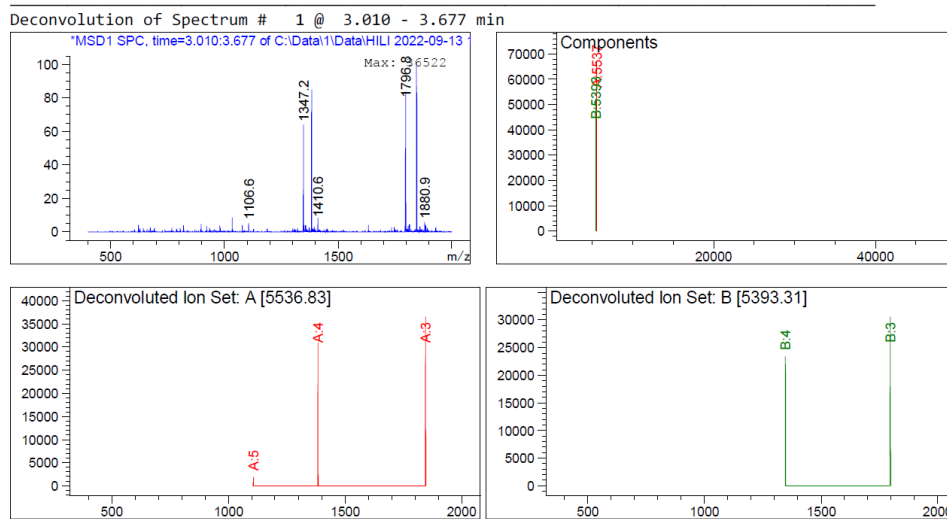

| Component | Molecular Weight | Absolute Abundance | Relative Abundance |
|-----------|------------------|--------------------|--------------------|
| A         | 5536.83          | 66853              | 100.00             |
| B         | 5393.31          | 52213              | 78.10              |

**Figure S48.** Deconvoluted LCMS data for **6d**

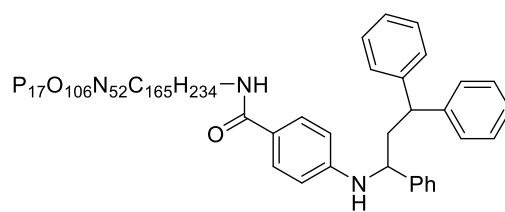

**3d**

Molecular Weight: 5574.0200

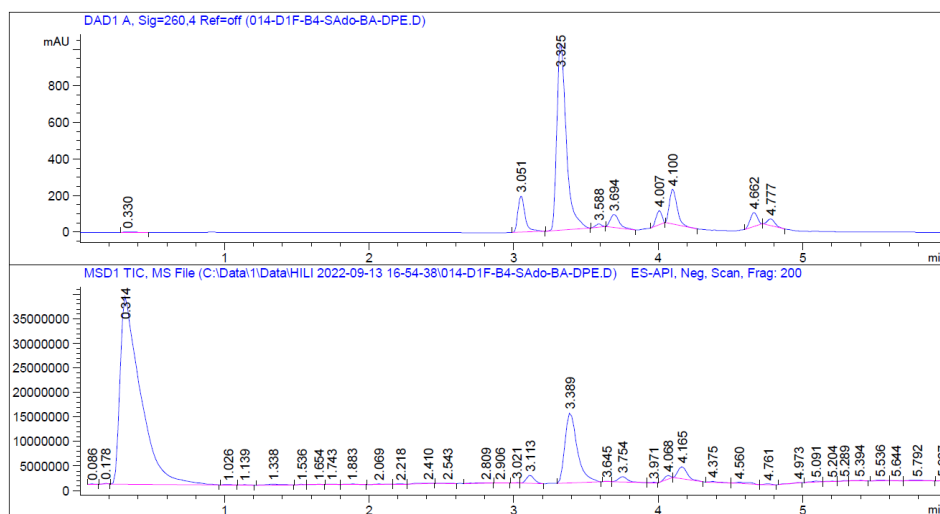

Deconvolution of Spectrum # 1 @ 3.270 - 4.278 min

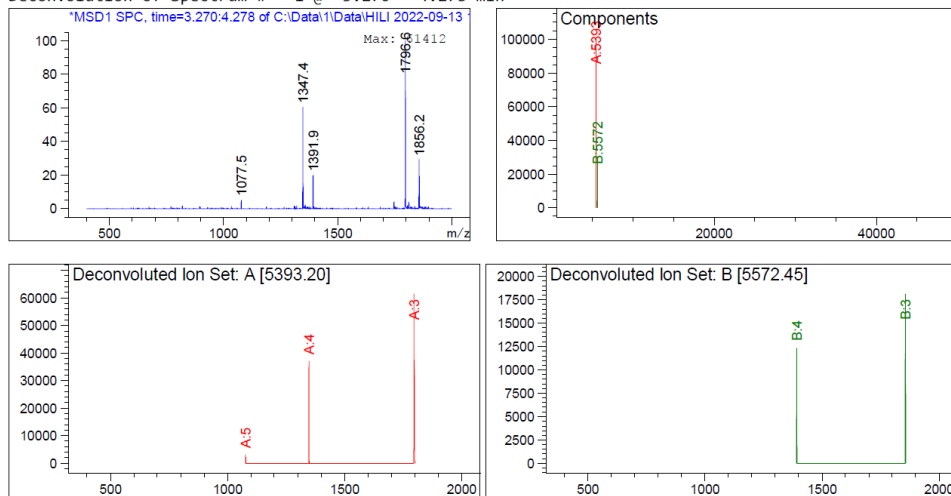

| Component | Molecular Weight | Absolute Abundance | Relative Abundance |
|-----------|------------------|--------------------|--------------------|
| A         | 5393.20          | 100616             | 100.00             |
| B         | 5572.45          | 30459              | 30.27              |

**Figure S49.** Deconvoluted LCMS data for **3d**

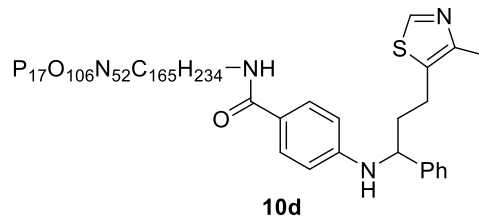

Molecular Weight: 5518.9590

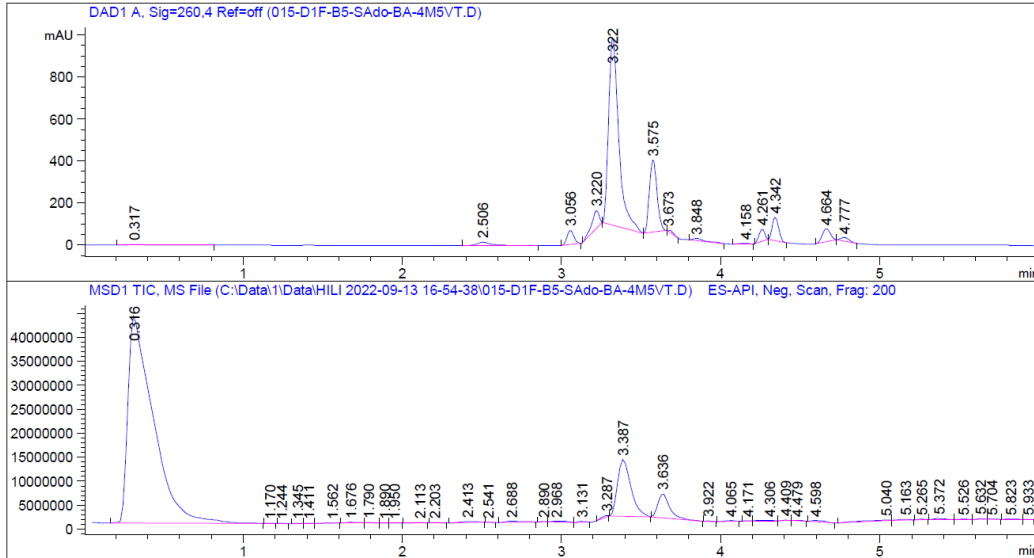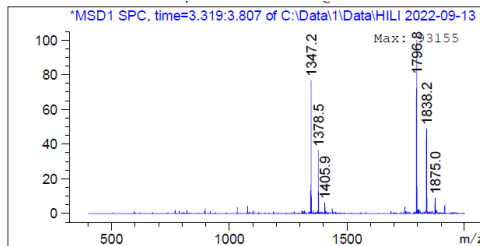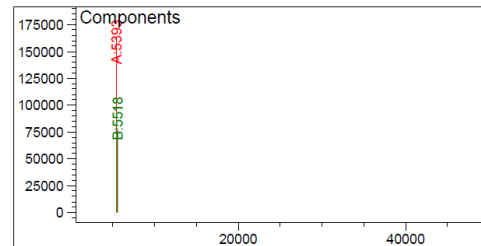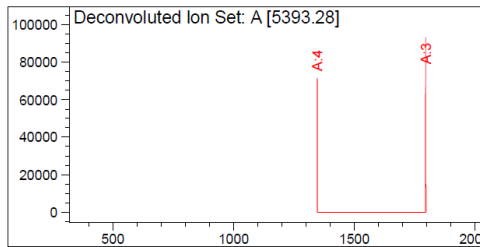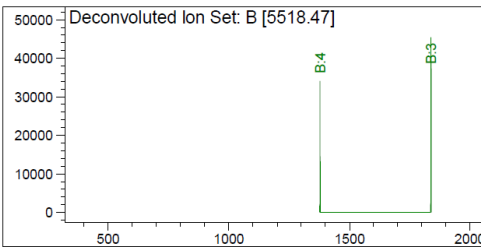

| Component | Molecular Weight | Absolute Abundance | Relative Abundance |
|-----------|------------------|--------------------|--------------------|
| A         | 5393.28          | 162858             | 100.00             |
| B         | 5518.47          | 78733              | 48.34              |

Figure S50. Deconvoluted LCMS data for 10d

## LCMS spectra and deconvolution results for 1e derivatives

**Table S6:** Hydroaminoalkylation of various vinylarenes with DNA conjugate **1e**

|                 | Starting Material (1e) | Single Addition | Double Addition | Triple Addition |
|-----------------|------------------------|-----------------|-----------------|-----------------|
| <b>1e+4VP</b>   | 39%                    | <b>25:</b> 40%  | 15%             | 6%              |
| <b>1e+4CS</b>   | 63%                    | <b>26:</b> 31%  | 6%              | -               |
| <b>1e+2BrS</b>  | 72%                    | <b>27:</b> 28%  | -               | -               |
| <b>1e+2VhB</b>  | 78%                    | <b>28:</b> 22%  | -               | -               |
| <b>1e+DPE</b>   | 86%                    | <b>29:</b> 14%  | -               | -               |
| <b>1e+diFP</b>  | 72%                    | <b>30:</b> 28%  | -               | -               |
| <b>1e+4M5VT</b> | 90%                    | <b>31:</b> 10%  | -               | -               |
| <b>1e+3EhP</b>  | 100%                   | -               | -               | -               |
| <b>1e+4FMS</b>  | 100%                   | -               | -               | -               |
| <b>1e+5EMP</b>  | 100%                   | -               | -               | -               |
| <b>1e+4MS</b>   | 100%                   | -               | -               | -               |
| <b>1e+4VBA</b>  | 100%                   | -               | -               | -               |
| <b>1e+4AS</b>   | 100%                   | -               | -               | -               |

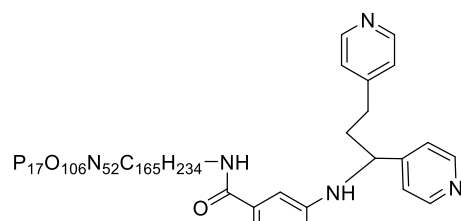

**25**

Molecular Weight: 5500.8860

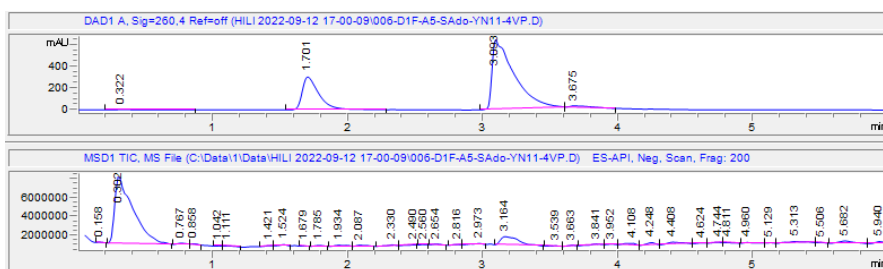

Deconvolution of Spectrum # 1 @ 3.091 - 3.335 min

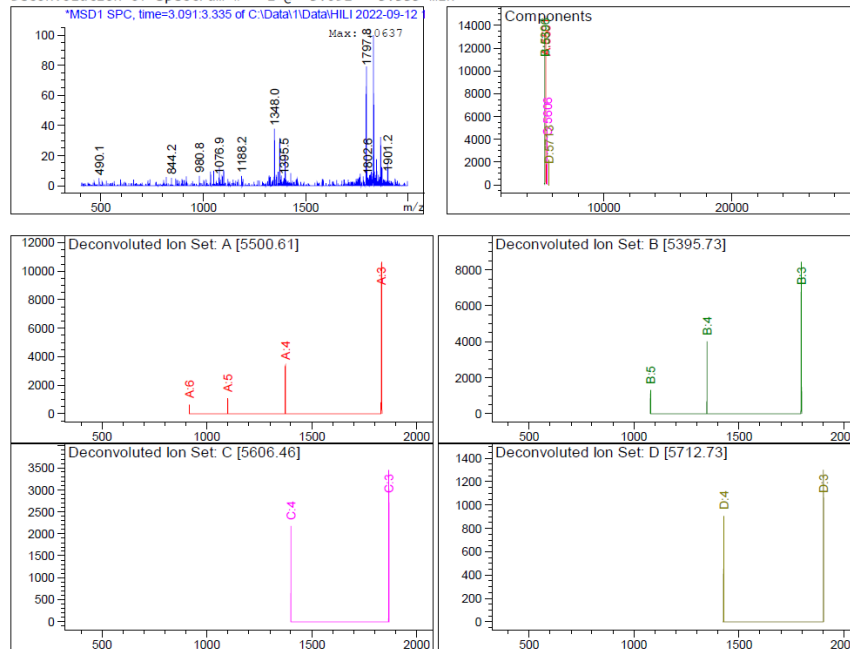

| Component | Molecular Weight | Absolute Abundance | Relative Abundance |
|-----------|------------------|--------------------|--------------------|
| A         | 5500.61          | 13318              | 100.00             |
| B         | 5395.73          | 13279              | 99.71              |
| C         | 5606.46          | 5036               | 37.81              |
| D         | 5712.73          | 2139               | 16.06              |

**Figure S51.** Deconvoluted LCMS data for **25**

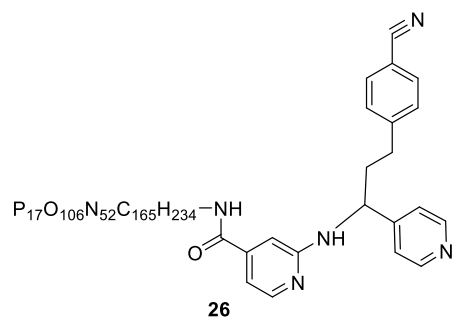

Molecular Weight: 5524.9080

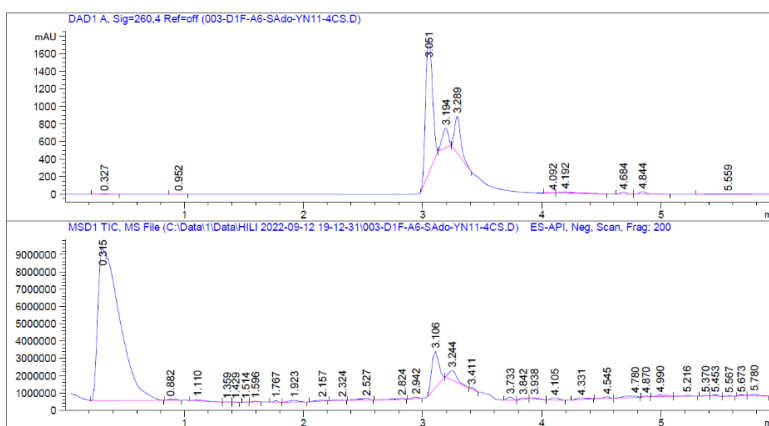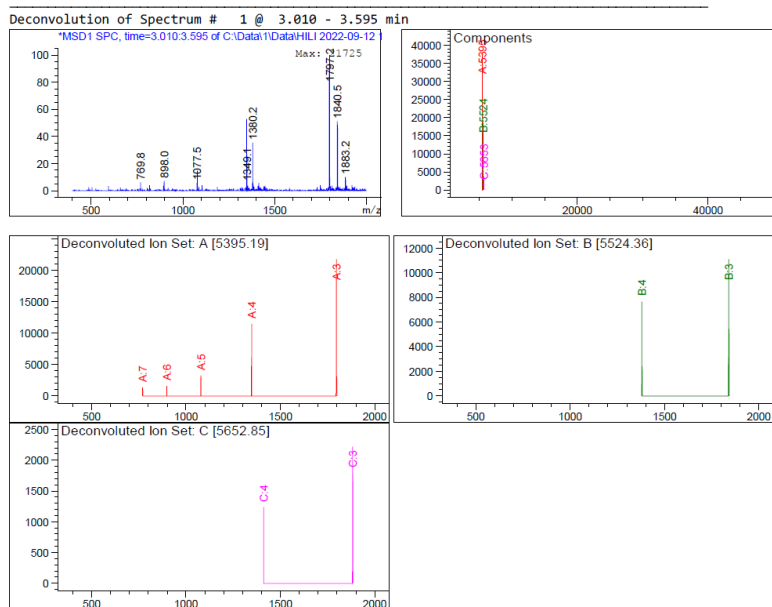

| Component | Molecular Weight | Absolute Abundance | Relative Abundance |
|-----------|------------------|--------------------|--------------------|
| A         | 5395.19          | 37767              | 100.00             |
| B         | 5524.36          | 18597              | 49.24              |
| C         | 5652.85          | 3453               | 9.14               |

**Figure S52.** Deconvoluted LCMS data for **26**

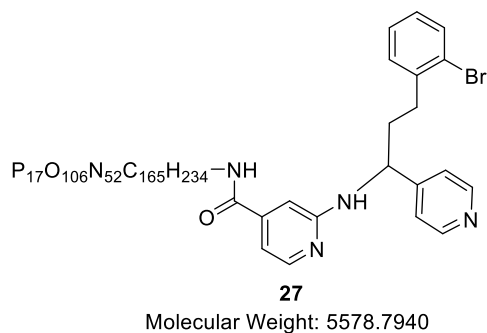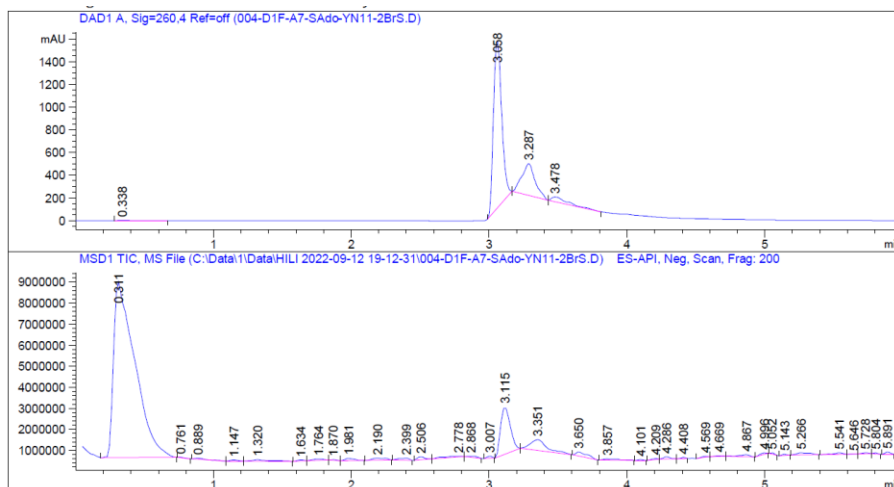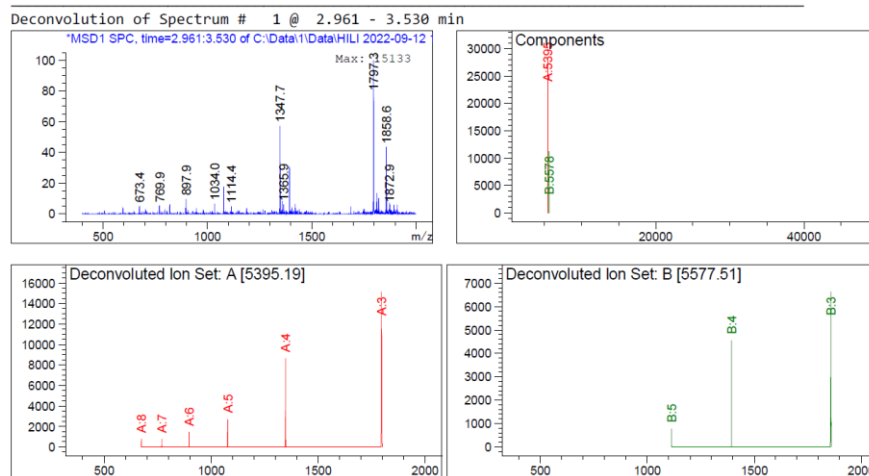

| Component | Molecular Weight | Absolute Abundance | Relative Abundance |
|-----------|------------------|--------------------|--------------------|
| A         | 5395.19          | 28271              | 100.00             |
| B         | 5577.51          | 11176              | 39.53              |

**Figure S53.** Deconvoluted LCMS data for **27**



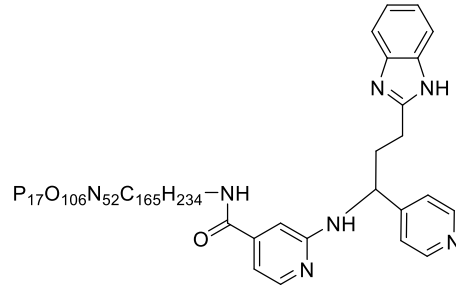

**28**

Molecular Weight: 5539.9230

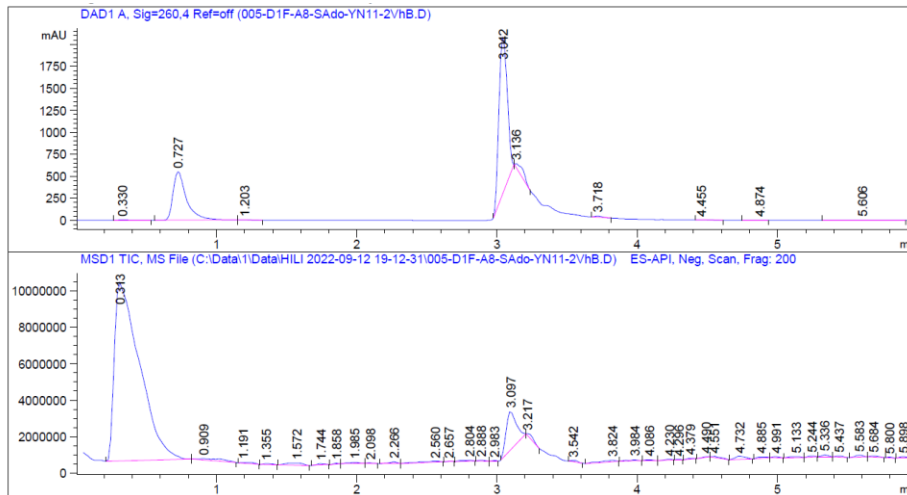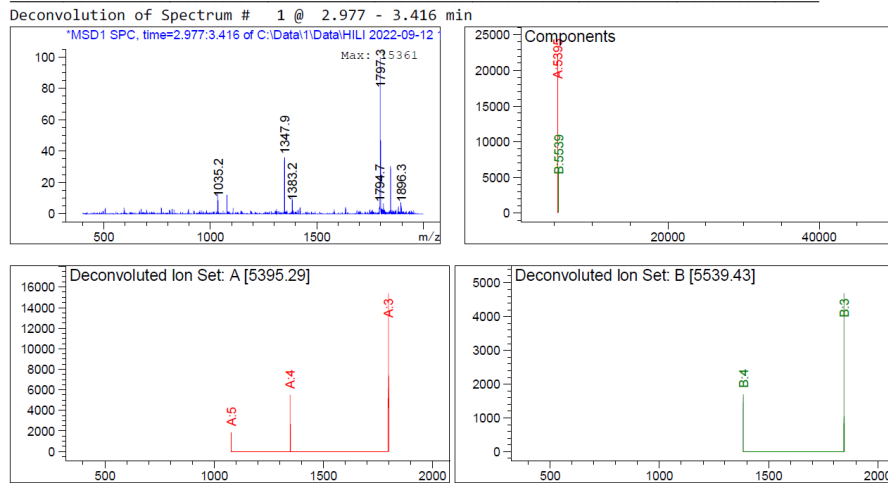

| Component | Molecular Weight | Absolute Abundance | Relative Abundance |
|-----------|------------------|--------------------|--------------------|
| A         | 5395.29          | 22199              | 100.00             |
| B         | 5539.43          | 6370               | 28.69              |

**Figure S54.** Deconvoluted LCMS data for **28**

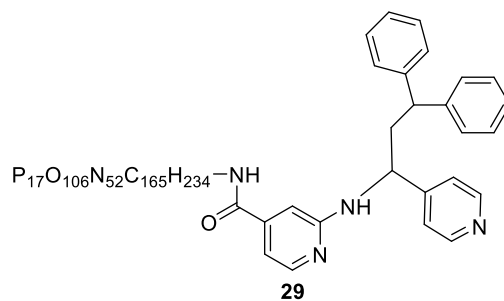

Molecular Weight: 5575.9960

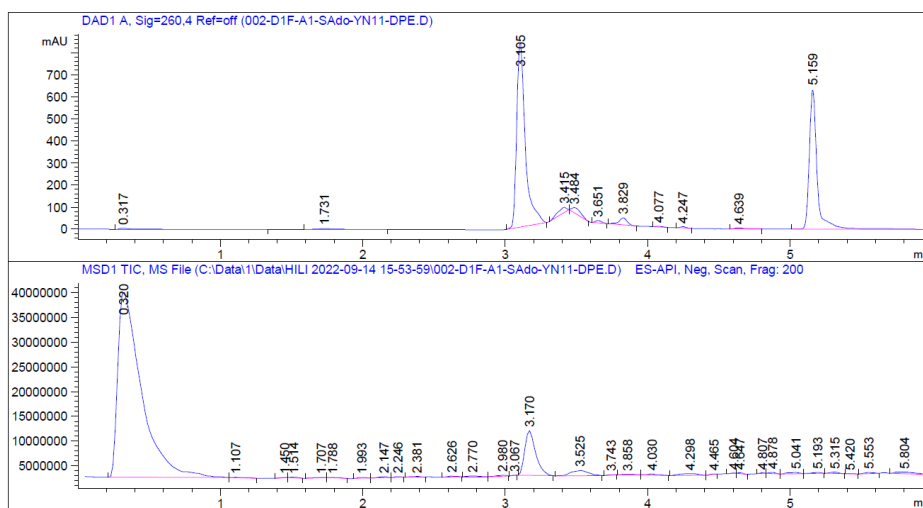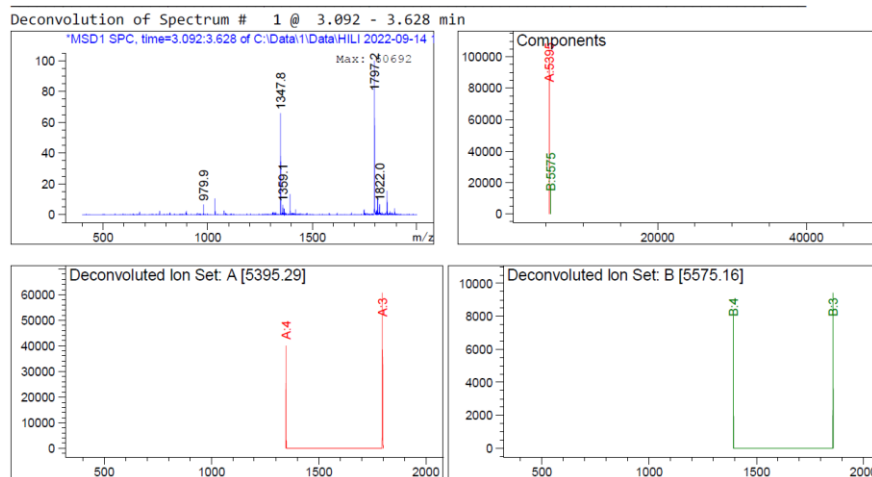

| Component | Molecular Weight | Absolute Abundance | Relative Abundance |
|-----------|------------------|--------------------|--------------------|
| A         | 5395.29          | 98910              | 100.00             |
| B         | 5575.16          | 16746              | 16.93              |

**Figure S55. Deconvoluted LCMS data for 29**

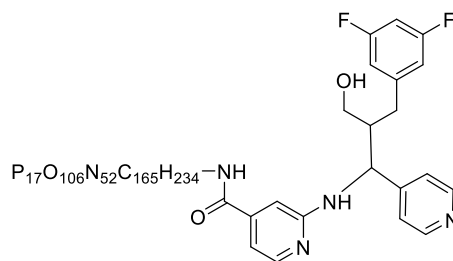

**30**

Molecular Weight: 5565.9048

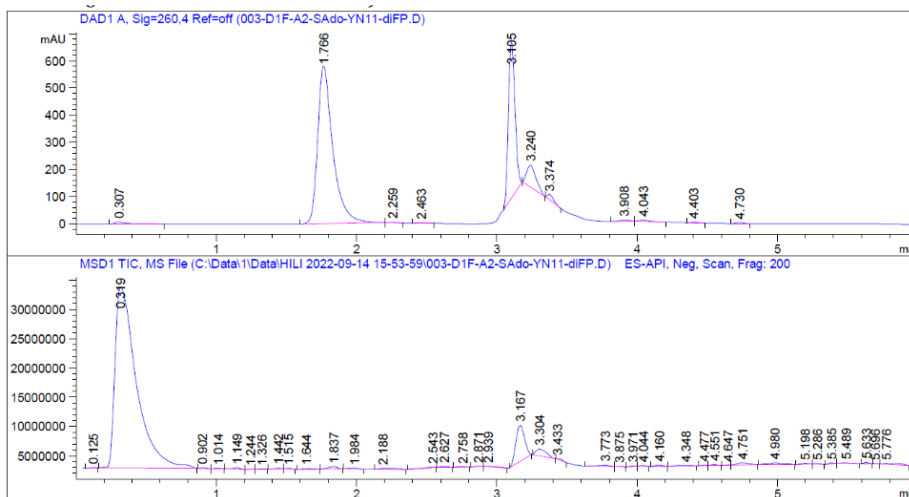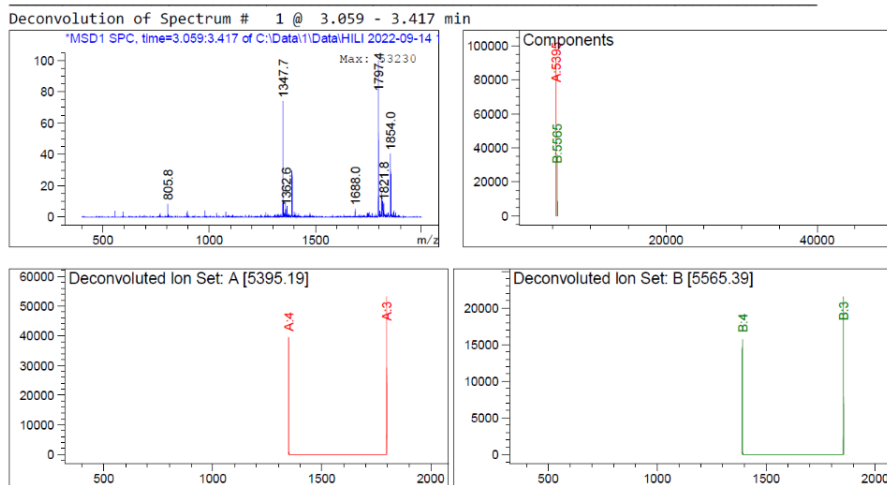

| Component | Molecular Weight | Absolute Abundance | Relative Abundance |
|-----------|------------------|--------------------|--------------------|
| A         | 5395.19          | 92618              | 100.00             |
| B         | 5565.39          | 36139              | 39.02              |

**Figure S56.** Deconvoluted LCMS data for **30**

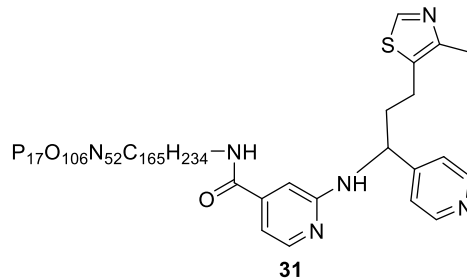

Molecular Weight: 5520.9350

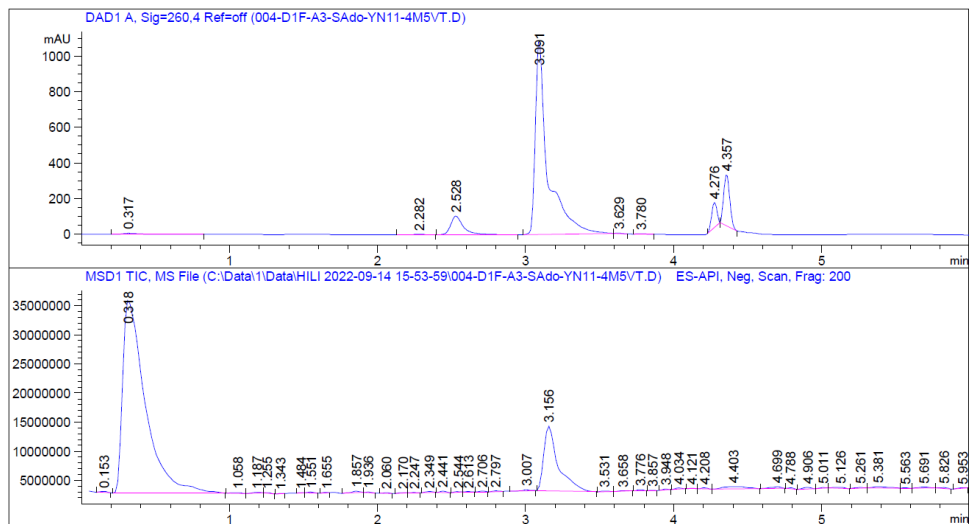

Deconvolution of Spectrum # 1 @ 2.994 - 3.433 min

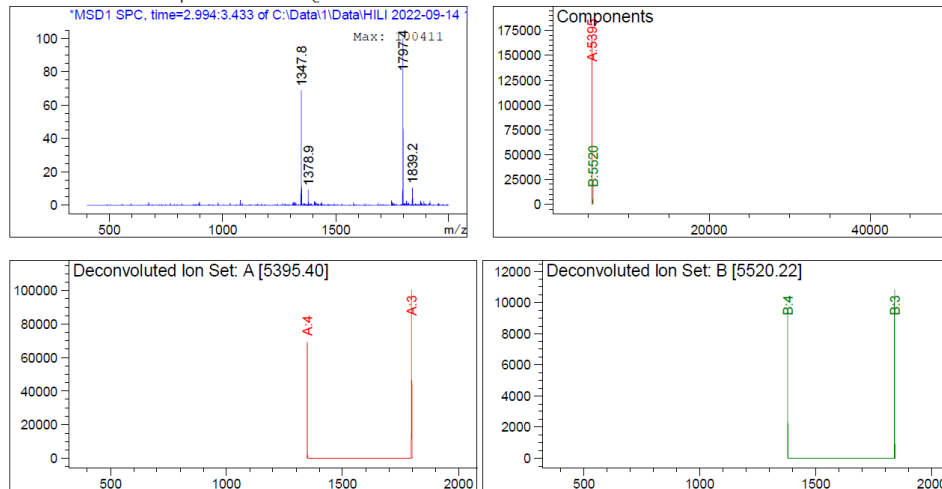

| Component | Molecular Weight | Absolute Abundance | Relative Abundance |
|-----------|------------------|--------------------|--------------------|
| A         | 5395.40          | 169561             | 100.00             |
| B         | 5520.22          | 19791              | 11.67              |

**Figure S57.** Deconvoluted LCMS data for **31**

## LCMS spectra and deconvolution results for 1f derivatives

**Table S7:** Hydroaminoalkylation of various vinylarenes with DNA conjugate **1f**

|                 | Starting Material ( <b>1f</b> ) | Single Addition | Double Addition | Triple Addition | Other                         |
|-----------------|---------------------------------|-----------------|-----------------|-----------------|-------------------------------|
| <b>1f+4VP</b>   | 29%                             | <b>15:</b> 39%  | 25%             | 7%              | -                             |
| <b>1f+4CS</b>   | 47%                             | <b>16:</b> 40%  | 13%             | -               | -                             |
| <b>1f+2BrS</b>  | 80%                             | <b>17:</b> 20%  | -               | -               | -                             |
| <b>1f+2VhB</b>  | 72%                             | <b>18:</b> 28%  | -               | -               | -                             |
| <b>1f+DPE</b>   | 73%                             | <b>19:</b> 27%  | -               | -               | -                             |
| <b>1f+diFP</b>  | 57%                             | <b>20:</b> 23%  | -               | -               | Dealkylated <b>1f:</b><br>20% |
| <b>1f+3EhP</b>  | 91%                             | <b>21:</b> 9%   | -               | -               | -                             |
| <b>1f+4M5VT</b> | 87%                             | <b>22:</b> 13%  | -               | -               | -                             |
| <b>1f+5EMP</b>  | 93%                             | <b>24:</b> 7%   | -               | -               | -                             |
| <b>1f+4FMS</b>  | 100%                            | <b>23:</b> 0%   | -               | -               | -                             |
| <b>1f+4MS</b>   | 100%                            | -               | -               | -               | -                             |
| <b>1f+4VBA</b>  | 100%                            | -               | -               | -               | -                             |
| <b>1f+4AS</b>   | 100%                            | -               | -               | -               | -                             |

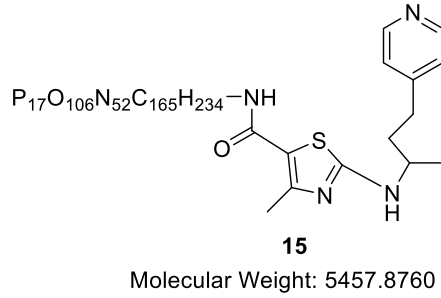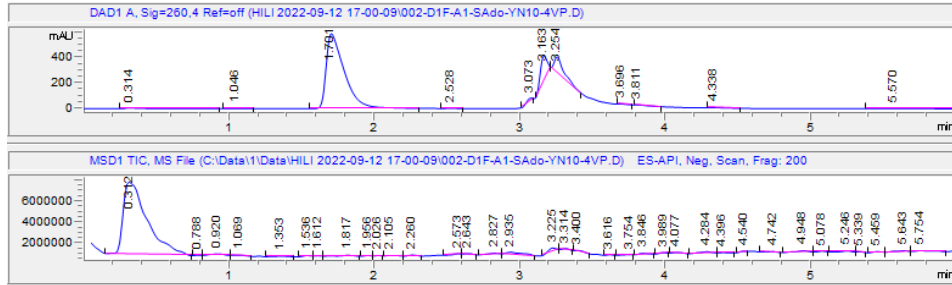

Deconvolution of Spectrum # 1 @ 3.172 - 3.481 min

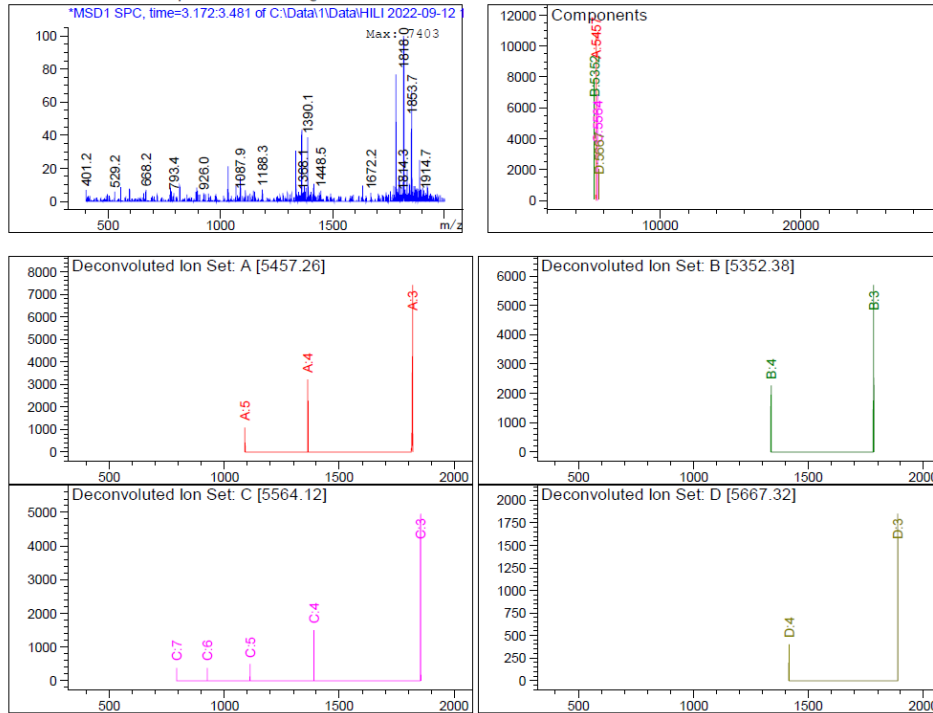

| Component | Molecular Weight | Absolute Abundance | Relative Abundance |
|-----------|------------------|--------------------|--------------------|
| A         | 5457.26          | 10806              | 100.00             |
| B         | 5352.38          | 7884               | 72.96              |
| C         | 5564.12          | 6808               | 63.00              |
| D         | 5667.32          | 2005               | 18.55              |

**Figure S58.** Deconvoluted LCMS data for **15**

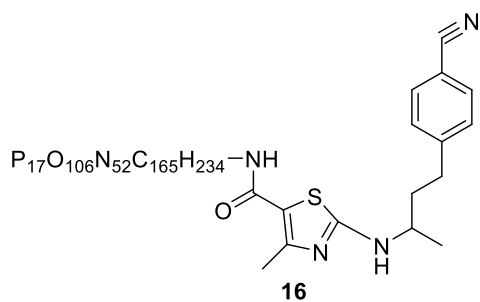

Molecular Weight: 5481.8980

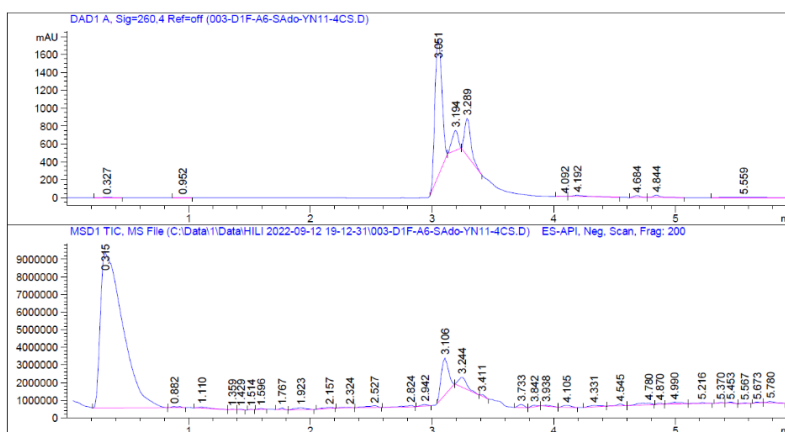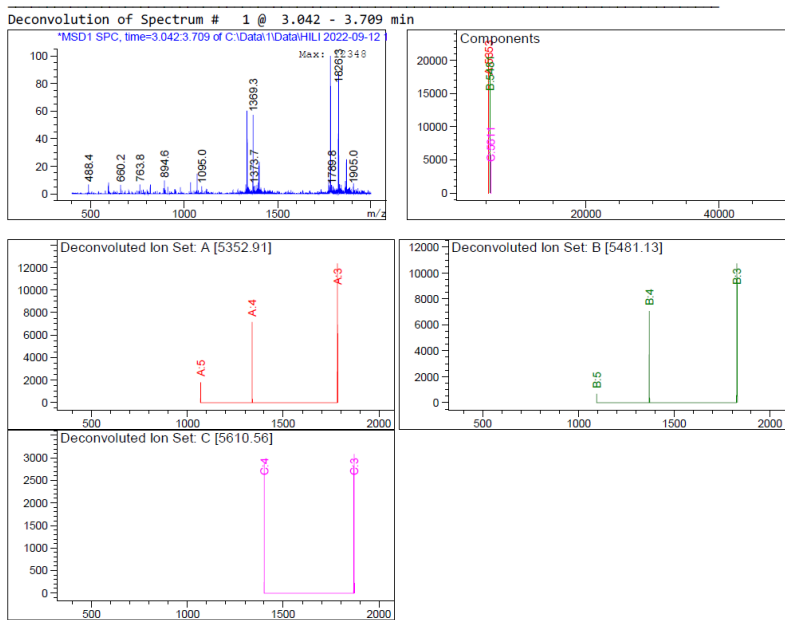

| Component | Molecular Weight | Absolute Abundance | Relative Abundance |
|-----------|------------------|--------------------|--------------------|
| A         | 5352.91          | 20957              | 100.00             |
| B         | 5481.13          | 18169              | 86.70              |
| C         | 5610.56          | 5687               | 27.14              |

**Figure S59.** Deconvoluted LCMS data for **16**

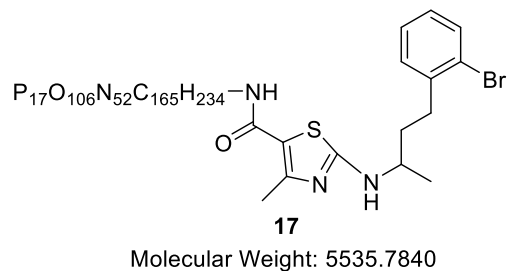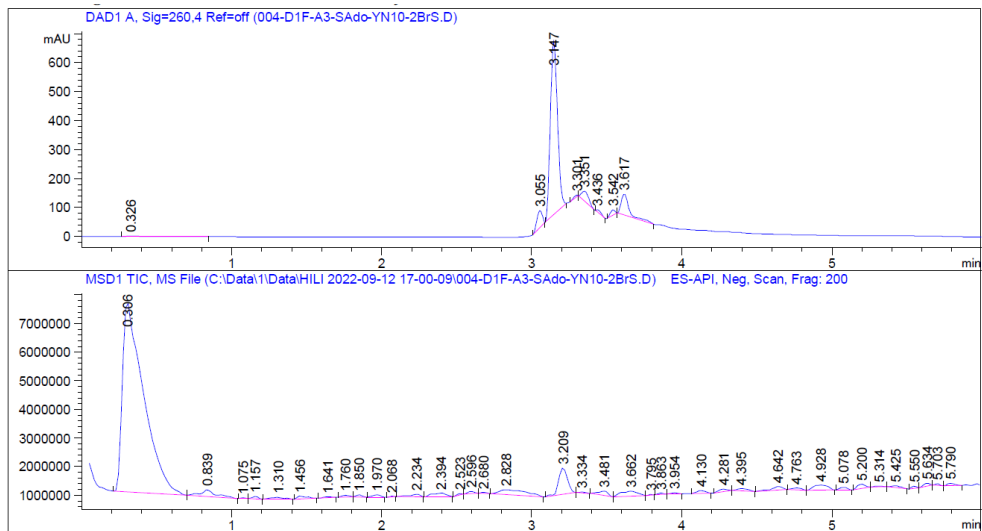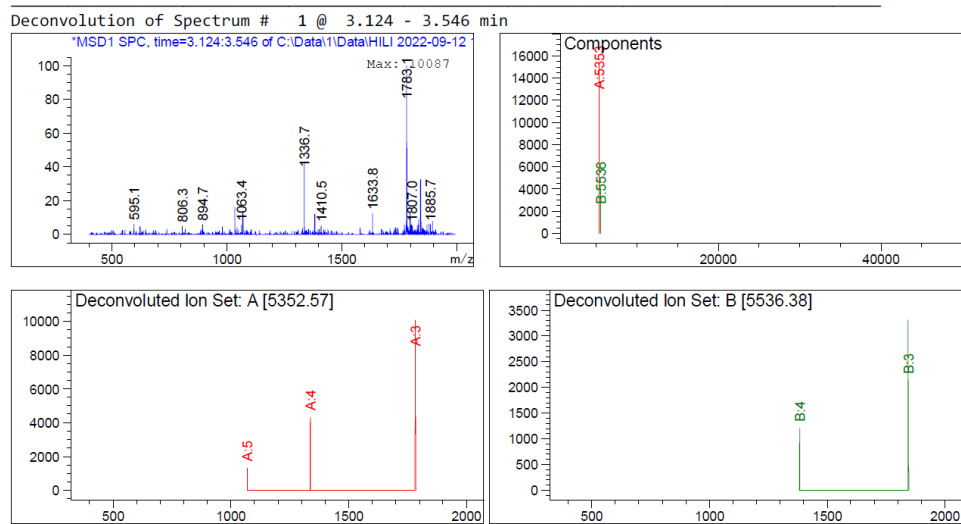

| Component | Molecular Weight | Absolute Abundance | Relative Abundance |
|-----------|------------------|--------------------|--------------------|
| A         | 5352.57          | 15344              | 100.00             |
| B         | 5536.38          | 3823               | 24.92              |

**Figure S60.** Deconvoluted LCMS data for **17**



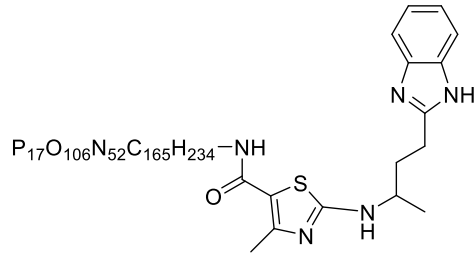

**18**

Molecular Weight: 5496.9130

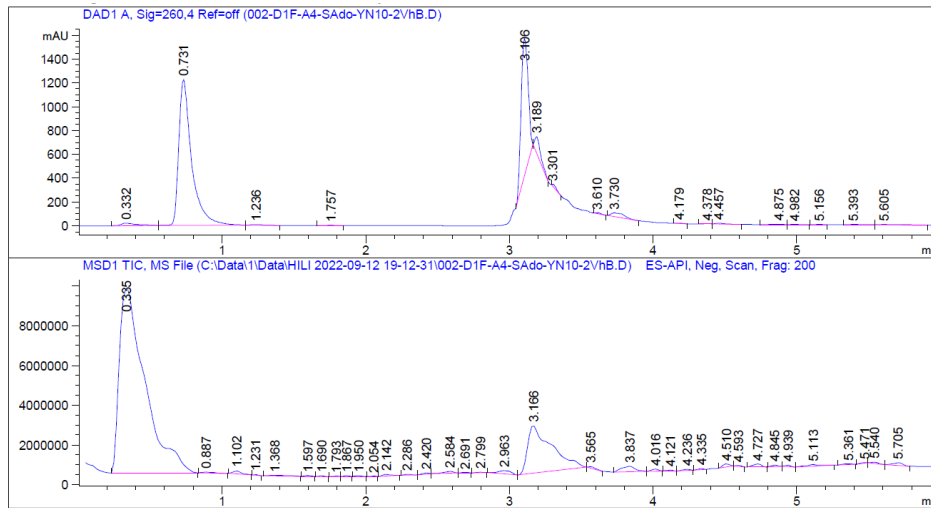

Deconvolution of Spectrum # 1 @ 3.059 - 3.546 min

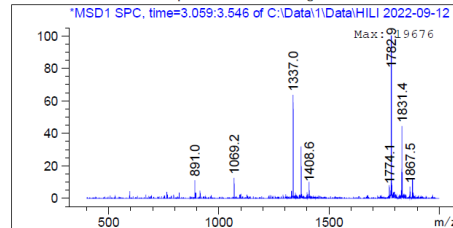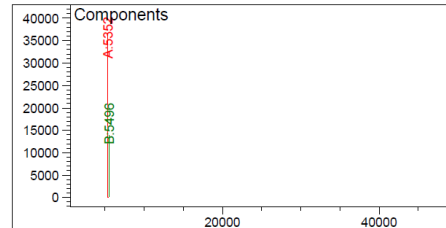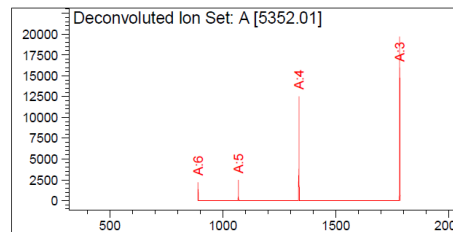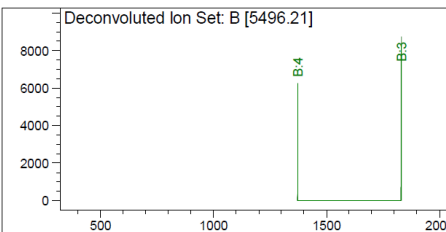

| Component | Molecular Weight | Absolute Abundance | Relative Abundance |
|-----------|------------------|--------------------|--------------------|
| A         | 5352.01          | 36598              | 100.00             |
| B         | 5496.21          | 13925              | 38.05              |

**Figure S61.** Deconvoluted LCMS data for **18**

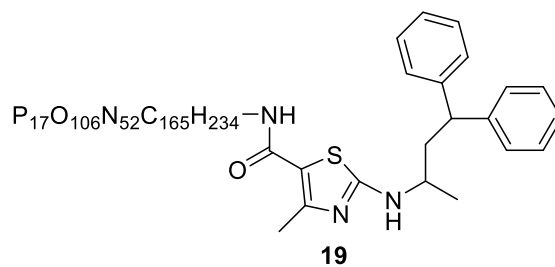

Molecular Weight: 5532.9860

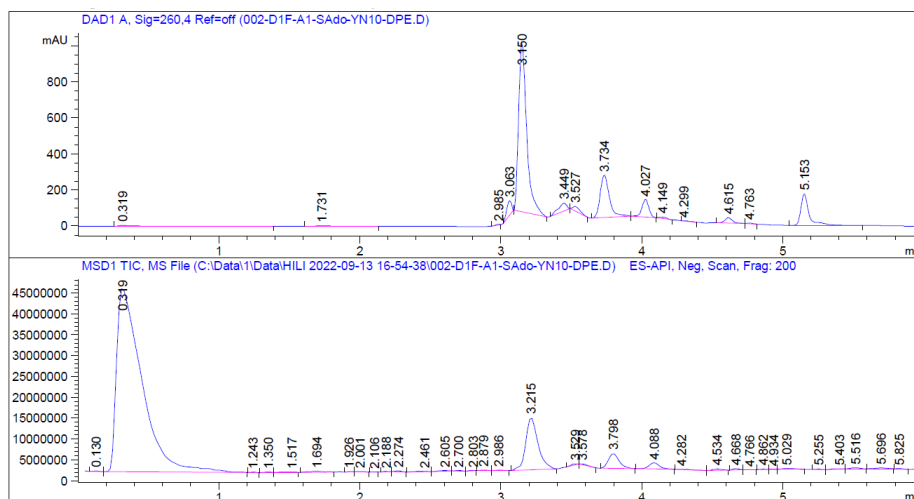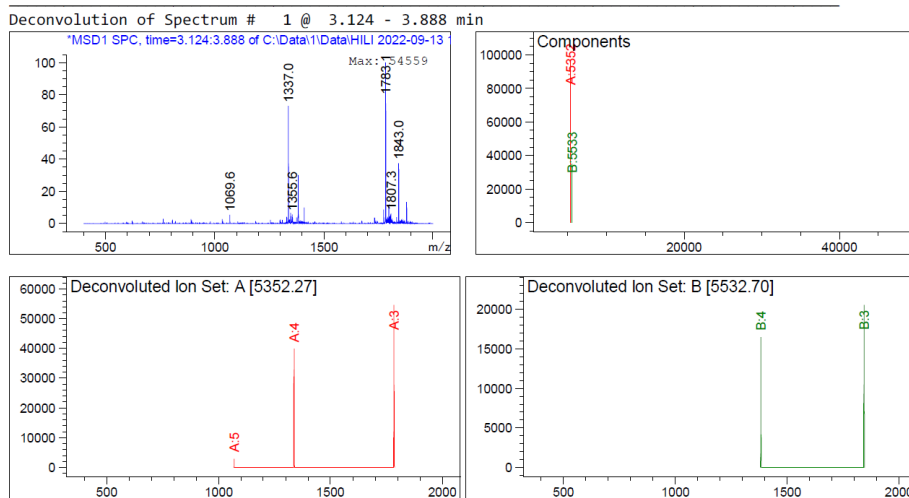

| Component | Molecular Weight | Absolute Abundance | Relative Abundance |
|-----------|------------------|--------------------|--------------------|
| A         | 5352.27          | 96726              | 100.00             |
| B         | 5532.70          | 34981              | 36.17              |

**Figure S62.** Deconvoluted LCMS data for **19**

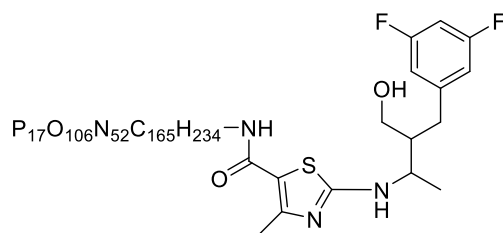

20

Molecular Weight: 5522.8948

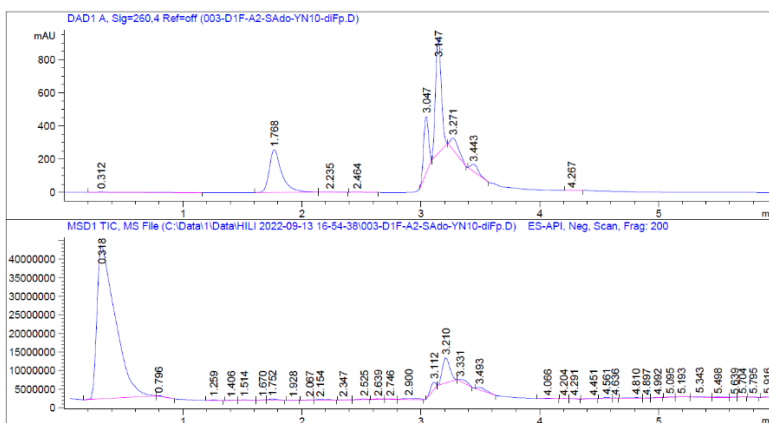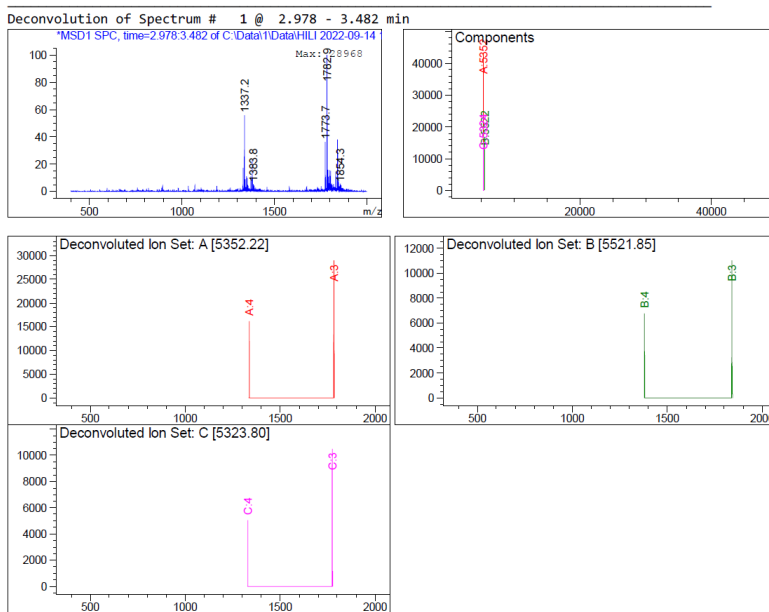

| Component | Molecular Weight | Absolute Abundance | Relative Abundance |
|-----------|------------------|--------------------|--------------------|
| A         | 5352.22          | 43189              | 100.00             |
| B         | 5521.85          | 16761              | 38.81              |
| C         | 5323.80          | 15220              | 35.24              |

Figure S63. Deconvoluted LCMS data for 20



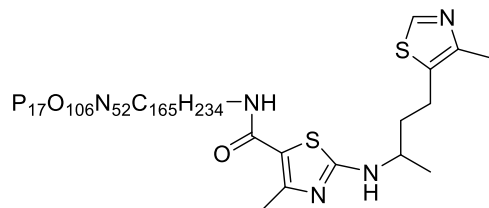

**22**

Molecular Weight: 5477.9250

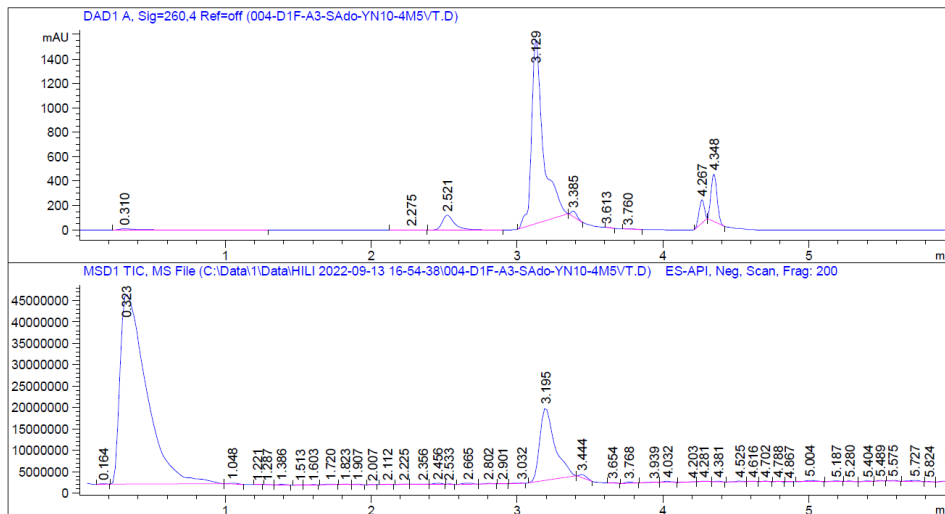

Deconvolution of Spectrum # 1 @ 3.059 - 3.530 min

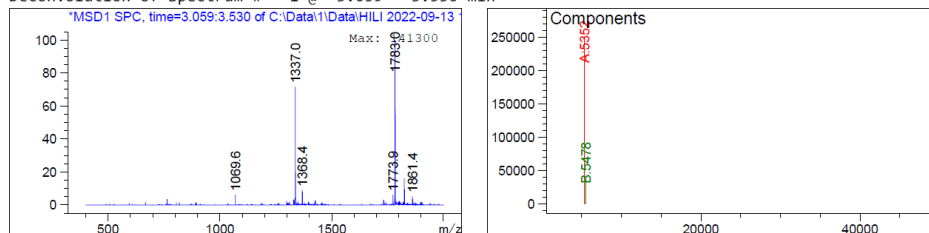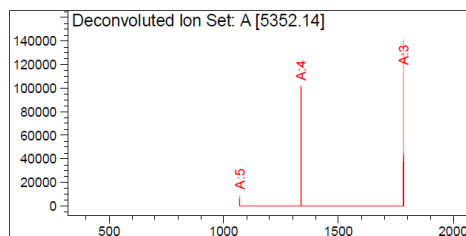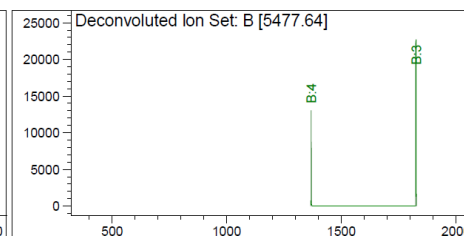

| Component | Molecular Weight | Absolute Abundance | Relative Abundance |
|-----------|------------------|--------------------|--------------------|
| A         | 5352.14          | 249573             | 100.00             |
| B         | 5477.64          | 35657              | 14.29              |

**Figure S65.** Deconvoluted LCMS data for **22**

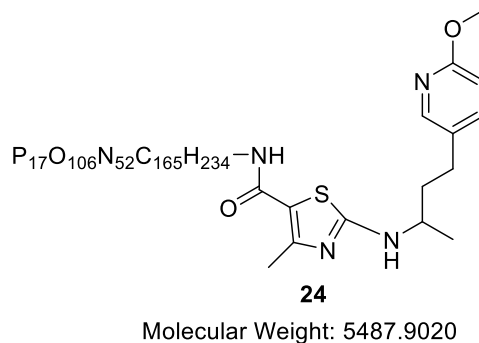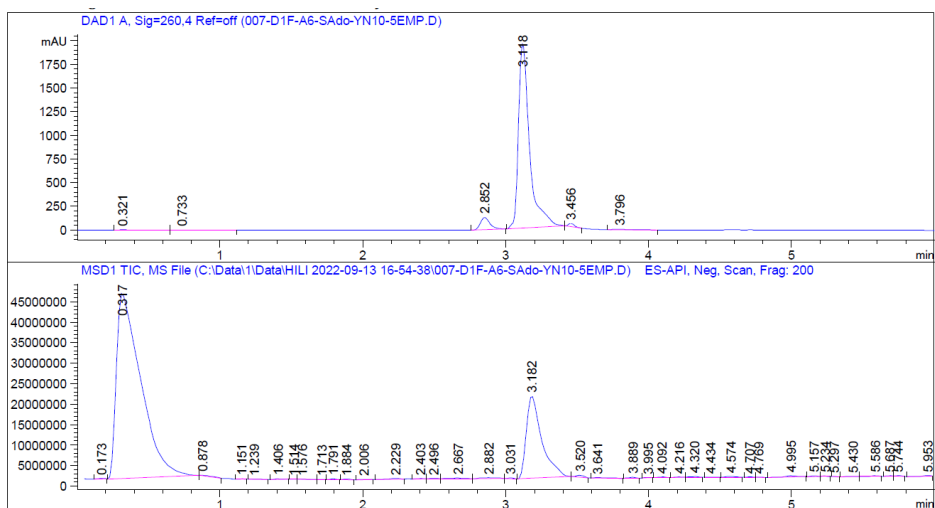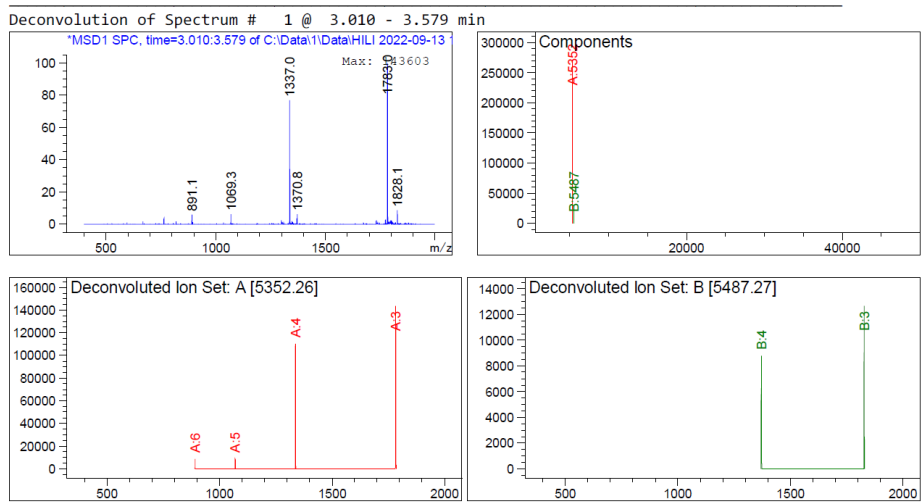

| Component | Molecular Weight | Absolute Abundance | Relative Abundance |
|-----------|------------------|--------------------|--------------------|
| A         | 5352.26          | 270283             | 100.00             |
| B         | 5487.27          | 21224              | 7.85               |

**Figure S66.** Deconvoluted LCMS data for **24**

## Analysis of post-reaction DNA integrity

### Synthesis and Purification of LongSAdo-HP-YN1

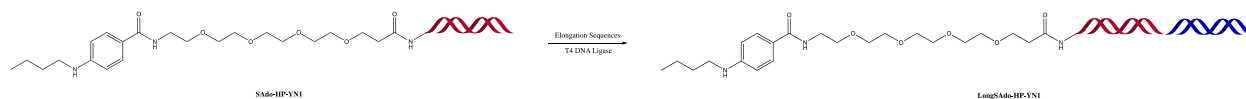

#### Elongation Duplex Sequences:

5'-/5Phos/AAA TCG ATG TGT TCC GCA AGA AGC CTG GTA AGC GGA GAA AGG TCG TT -3'

5'-/5Phos/CGA CCT TTC TCC GCT TAC CAG GCT TCT TGC GGA ACA CAT CGA TTT GG -3'

Ligation was conducted using a modified procedure.<sup>1,4</sup> The elongation duplex (IDT) were first combined by adding 100  $\mu$ L of 2 mM of each strand, in water (200  $\mu$ L total). The duplex was annealed by heating to 95  $^{\circ}$ C for 5 minutes, then cooling to rt at a ramp of -0.1  $^{\circ}$ C/s. The annealed duplex solution (1.4 equiv, 185.9  $\mu$ L, 1 mM) was added to SAdo-HP-YN1 (1 equiv, 132.8 nmol, 132.8  $\mu$ L, 1 mM), along with 150.2  $\mu$ L of water, and 53  $\mu$ L 10x T4 ligation buffer. The sample was then heated to 95  $^{\circ}$ C for 1 minute, and cooled to 16  $^{\circ}$ C over 10 minutes. T4 ligase (7.98  $\mu$ L, 400,000 cohesive end units/mL, NEB) was added, the reaction was mixed gently by pipetting up and down, and left to react overnight at 16  $^{\circ}$ C. Ethanol precipitation was completed according to the general procedure for ethanol precipitation. The product was purified using HPLC and the collected fractions were lyophilized three times, prior to the hydroaminoalkylation photoreaction.

#### Quantitative PCR analysis protocol

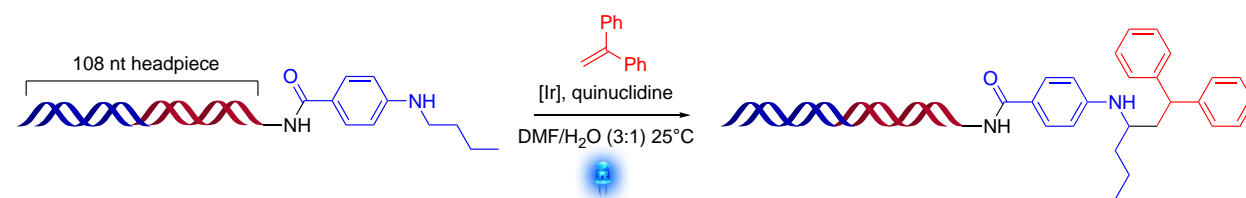

#### Forward and Reverse Primer Sequences:

DELPCR1: 5'-TGA CTC CCA AAT CGA TGT G-3' T<sub>m</sub> (50 mM NaCl) = 52.2  $^{\circ}$ C

DELPCR3: 5'-AAC GAC CTT TCT CCG CT -3' T<sub>m</sub> (50 mM NaCl) = 53.7  $^{\circ}$ C

Quantitative PCR was performed after the hydroaminoalkylation photoreaction on LongSAdo-HP-YN1 and compared against a no-reaction control. Data was collected using a CFX Connect instrument from Bio-Rad. A standard curve was prepared at 100 nM, 10 nM, 1 nM, 0.1 nM and 0.01 nM concentrations. The qPCR reagents were prepared with SYBR Green I as the detection dye. To 10  $\mu$ L of 1  $\mu$ M of the template sequence, was added 2.5  $\mu$ L of each primer (IDT) at 10  $\mu$ M, 5  $\mu$ L of 10x SYBR Green, 5  $\mu$ L of water, and 25  $\mu$ L of 2X Q5 Master Mix (NEB), for a total of 50  $\mu$ L. The resulting  $\Delta$ C<sub>t</sub> value was calculated using CFX manager. The qPCR cycles were as follows:

| Cycle Step | Temperature, $^{\circ}$ C | Time (seconds) | Cycles |
|------------|---------------------------|----------------|--------|
| Initiation | 95                        | 30             | 1      |

|              |    |                 |    |
|--------------|----|-----------------|----|
| Denaturation | 95 | 10              | 30 |
| Annealing    | 58 | 30              |    |
| Extension    | 72 | 30 + plate read |    |

### **Ligation Test on LongSAdo-HP-YN1**

#### Closing Primer Sequences:

5'-/5Phos/ACG ATG CCC GGT CTA CNN NNN NNN NNN NCT GAT GGC GCG AGG GAG GC-3'

5'-GTA GAC CGG GCA TCG TAA-3'

Following the photoreaction on LongSAdo-HP-YN1, ligation efficacy was assessed to evaluate the integrity of the DNA code for downstream applications. Closing primers were ligated on as previously described. The 10 nmol hydroaminoalkylation reaction and no reaction control were both cleaned up by ethanol precipitation (according to the general procedure), and 30 pmols of each sample was loaded with Gel Loading Buffer II (ThermoFisher) onto a 15% denaturing gel for polyacrylamide gel electrophoresis (150 V, 70 minutes). The gel was stained with ethidium bromide and visualized using Bio-Rad Gel Doc XR+. Densitometry was performed using Rio-Rad Image Lab.



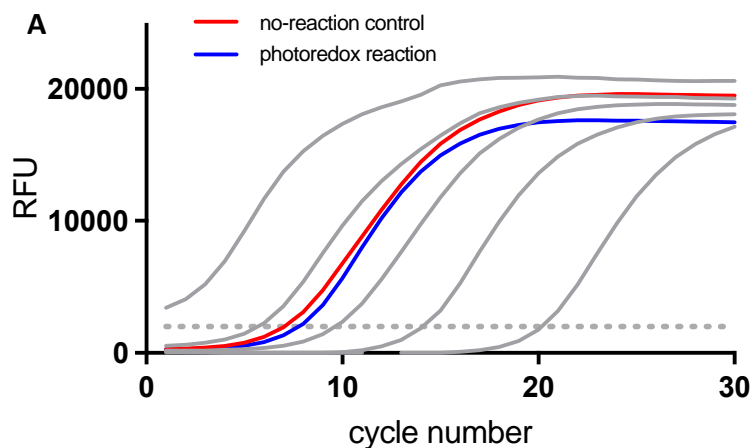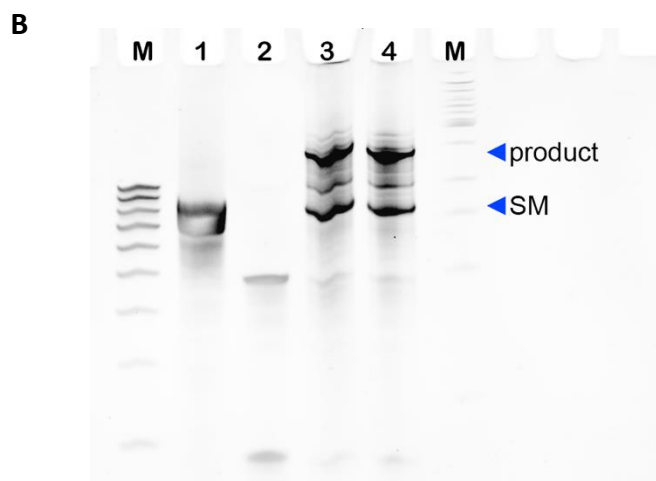

**Figure S67.** Analysis of DNA tag integrity following photoredox-catalysed hydroaminoalkylation of longSAdo-YN1 and DPE. **A)** Photoredox reactions were performed on 10 nmol scale. qPCR analysis was performed using Q5 polymerase (M0492, NEB). Grey lines indicate 10-fold dilution series. Red and blue curves indicate no-reaction control and photoredox reaction, respectively. Cycle threshold values were used to calculate concentrations. 29.9% degradation was observed for this process compared to the no-reaction control. **B)** Ligation efficiency comparison between the no-reaction control and DNA photoredox catalysed hydroaminoalkylation reaction using T4 DNA ligase (M0202, NEB). M: molecular weight ladder, 1: starting long SAdo-YN1 substrate, 2: closing duplex, 3: ligation reaction of long-SAdo-YN1 photoreacted with 1,1-dipheylethylene, 4: ligation reaction of long-SAdo-YN1 as no-reaction control, M: molecular weight ladder.

## References

- (1) Clark, M. A.; Acharya, R. A.; Arico-Muendel, C. C.; Belyanskaya, S. L.; Benjamin, D. R.; Carlson, N. R.; Centrella, P. A.; Chiu, C. H.; Creaser, S. P.; Cuozzo, J. W.; Davie, C. P.; Ding, Y.; Franklin, G. J.; Franzen, K. D.; Gefter, M. L.; Hale, S. P.; Hansen, N. J. V.; Israel, D. I.; Jiang, J.; Kavarana, M. J.; Kelley, M. S.; Kollmann, C. S.; Li, F.; Lind, K.; Mataruse, S.; Medeiros, P. F.; Messer, J. A.; Myers, P.; O'Keefe, H.; Oliff, M. C.; Rise, C. E.; Satz, A. L.; Skinner, S. R.; Svendsen, J. L.; Tang, L.; van Vloten, K.; Wagner, R. W.; Yao, G.; Zhao, B.; Morgan, B. A. Design, Synthesis and Selection of DNA-Encoded Small-Molecule Libraries. *Nat. Chem. Biol.* **2009**, *5* (9), 647–654. <https://doi.org/10.1038/nchembio.211>.
- (2) Andrade, A. L.; Melich, K.; Whatley, G. G.; Kirk, S. R.; Karpen, J. W. Cyclic Nucleotide-Gated Channel Block by Hydrolysis-Resistant Tetracaine Derivatives. *J. Med. Chem.* **2011**, *54* (13), 4904–4912. <https://doi.org/10.1021/jm200495g>.
- (3) Abdel-Magid, A. F.; Carson, K. G.; Harris, B. D.; Maryanoff, C. A.; Shah, R. D. Reductive Amination of Aldehydes and Ketones with Sodium Triacetoxyborohydride. Studies on Direct and Indirect Reductive Amination Procedures. *J. Org. Chem.* **1996**, *61* (11), 3849–3862. <https://doi.org/10.1021/jo960057x>.
- (4) J. P. Phelan, S. B. Lang, J. Sim, S. Berritt, A. J. Peat, K. Billings, L. Fan and G. A. Molander, *J. Am. Chem. Soc.*, 2019, **141**, 3723–3732. <https://doi.org/10.1021/jacs.9b00669>.
